# Supplementary material for: New insights into the degradation mechanism of ibuprofen in the UV/H2O2 process: role of natural dissolved matter in hydrogen transfer reactions
Source: Royal Society of Chemistry journal article supplement (doi:10.1039/d3cp03305h), 2023-01-01
Supplement: d3cp03305h1.pdf [file d3cp03305h1.pdf]

**Electronic Supplementary Information for**  
New Insights into the Degradation Mechanism of Ibuprofen in  
UV/H<sub>2</sub>O<sub>2</sub> Process: Role of Natural Dissolved Matter in  
Hydrogen Transfer Reactions

Zhezheng Ding, Jiahui Zhang, Timing Fang, Guohui Zhou, Xiao Tang, Yan Wang,  
Xiaomin Liu\*

School of Chemistry and Chemical Engineering, Qingdao University,  
Qingdao, 266071, Shandong, China

---

\*Corresponding author. E-mail: liuxiaomin@qdu.edu.cn

**Table S1.** Energy barriers ( $\Delta G^*$ , in kcal mol<sup>-1</sup>) of R1-R5 calculated by M06-2X, CBS-QB3, MPWB1K and WB97XD methods with the same basis set mentioned in the main text. ‘SD’ refers to the standard deviation of each method with respect to CBS-QB3.

|    | $\Delta G^*_{\text{M06-2X}}$ | $\Delta G^*_{\text{CBS-QB3}}$ | $\Delta G^*_{\text{MPWB1K}}$ | $\Delta G^*_{\text{WB97XD}}$ |
|----|------------------------------|-------------------------------|------------------------------|------------------------------|
| R1 | 8.02                         | 8.66                          | 9.27                         | 6.74                         |
| R2 | 7.31                         | 8.03                          | 9.02                         | 5.00                         |
| R3 | 9.47                         | 9.91                          | 11.54                        | 7.03                         |
| R4 | 10.65                        | 11.74                         | 10.23                        | 9.11                         |
| R5 | 9.68                         | 10.30                         | 9.94                         | 8.23                         |
| SD | 0.33                         | 0                             | 0.51                         | 1.14                         |

**Table S2.** Gibbs free energies of all species, calculated at the CBS-QB3//M06-2X-D3/6-311+g(d,p) level, involved in this work. The unit is Hartree.

| Species | Gibbs free energies |
|---------|---------------------|
| IBU     | -656.413830         |
| IM1     | -655.776276         |
| IM2     | -655.766375         |
| IM3     | -655.757868         |
| IM4     | -655.757161         |
| IM5     | -655.756776         |
| IM6     | -806.138560         |
| IM7     | -806.130100         |
| IM8     | -806.121445         |
| IM9     | -498.625887         |
| IM10    | -806.125156         |
| IM11    | -688.314564         |
| IM12    | -498.605691         |
| IM13    | -806.126072         |
| IM14    | -806.139939         |
| IM15    | -806.137947         |
| P1      | -806.784109         |
| P2      | -730.461379         |
| P3      | -612.626087         |
| P4      | -615.926389         |
| P5      | -731.641281         |
| P6      | -574.522844         |
| P7      | -806.780807         |
| P8      | -691.185421         |
| P9      | -731.617306         |
| P10     | -655.214036         |
| P11     | -655.219827         |
| IMs1    | -655.742047         |
| IMs2    | -655.741191         |
| IMs3    | -655.743040         |
| IMs4    | -655.741678         |
| IMs5    | -655.735514         |
| IMs6a   | -732.170967         |
| IMs6s   | -732.175795         |
| IMs7a   | -732.171276         |
| IMs7s   | -732.170292         |
| IMs8a   | -732.171323         |

|                                                 |              |
|-------------------------------------------------|--------------|
| IMs8s                                           | -732.172237  |
| IMs9a                                           | -732.168237  |
| IMs9s                                           | -732.172518  |
| IMs10a                                          | -732.170652  |
| IMs10s                                          | -732.170321  |
| IMs11a                                          | -732.169999  |
| IMs11s                                          | -732.175506  |
| IMs12                                           | -732.152323  |
| IBU <sup>+</sup>                                | -656.168671  |
| TS1 (IBU→IM1)                                   | -732.146542  |
| TS2 (IBU→IM2)                                   | -732.147550  |
| TS3 (IBU→IM3)                                   | -732.144561  |
| TS4 (IBU→IM4)                                   | -732.141633  |
| TS5 (IBU→IM5)                                   | -732.143932  |
| TS6 (P1→P2)                                     | -806.717519  |
| TS6-H <sub>2</sub> O (P1→P2)                    | -883.172662  |
| TS6-NH <sub>3</sub> (P1→P2)                     | -863.291346  |
| TS6-CH <sub>3</sub> OH (P1→P2)                  | -922.432498  |
| TS6-C <sub>2</sub> H <sub>5</sub> OH (P1→P2)    | -961.717875  |
| TS6-HCOOH (P1→P2)                               | -996.501869  |
| TS6-CH <sub>3</sub> COOH (P1→P2)                | -1035.795477 |
| TS7 (P1→P3)                                     | -806.693484  |
| TS8 (IM1→P4)                                    | -655.719630  |
| TS9 (IM1→IM6)                                   | -806.097642  |
| TS10 (IM6→IM7)                                  | -806.082509  |
| TS10-H <sub>2</sub> O (IM6→IM7)                 | -882.527737  |
| TS10-NH <sub>3</sub> (IM6→IM7)                  | -862.638896  |
| TS10-CH <sub>3</sub> OH (IM6→IM7)               | -921.789819  |
| TS10-C <sub>2</sub> H <sub>5</sub> OH (IM6→IM7) | -961.075025  |
| TS10-HCOOH (IM6→IM7)                            | -995.858325  |
| TS10-CH <sub>3</sub> COOH (IM6→IM7)             | -1035.150404 |
| TS11 (IM7→P2)                                   | -806.109562  |
| TS12 (IM6→IM8)                                  | -806.093044  |
| TS12-H <sub>2</sub> O (IM6→IM8)                 | -882.530837  |
| TS12-NH <sub>3</sub> (IM6→IM8)                  | -862.644836  |
| TS12-CH <sub>3</sub> OH (IM6→IM8)               | -921.793819  |
| TS12-C <sub>2</sub> H <sub>5</sub> OH (IM6→IM8) | -961.077885  |
| TS12-HCOOH (IM6→IM8)                            | -995.860325  |
| TS12-CH <sub>3</sub> COOH (IM6→IM8)             | -1035.153403 |
| TS13 (IM8→IM9)                                  | -806.079934  |
| TS14 (IM6→IM10)                                 | -806.098329  |
| TS14-H <sub>2</sub> O (IM6→IM10)                | -882.535237  |

|                                                   |              |
|---------------------------------------------------|--------------|
| TS14-NH <sub>3</sub> (IM6→IM10)                   | -862.657638  |
| TS14-CH <sub>3</sub> OH (IM6→IM10)                | -921.798519  |
| TS14-C <sub>2</sub> H <sub>5</sub> OH (IM6→IM10)  | -961.083025  |
| TS14-HCOOH (IM6→IM10)                             | -995.865325  |
| TS14-CH <sub>3</sub> COOH (IM6→IM10)              | -1035.162402 |
| TS15 (IM10→IM11)                                  | -806.089904  |
| TS16 (IM11→P3)                                    | -688.312293  |
| TS17 (P7→P8)                                      | -806.643168  |
| TS18 (IM2→IM12)                                   | -655.706172  |
| TS19 (IM2→IM13)                                   | -806.095632  |
| TS20 (IM13→IM14)                                  | -806.073697  |
| TS20-H <sub>2</sub> O (IM13→IM14)                 | -882.508640  |
| TS20-NH <sub>3</sub> (IM13→IM14)                  | -862.634639  |
| TS20-CH <sub>3</sub> OH (IM13→IM14)               | -921.780952  |
| TS20-C <sub>2</sub> H <sub>5</sub> OH (IM13→IM14) | -961.064598  |
| TS20-HCOOH (IM13→IM14)                            | -995.849912  |
| TS20-CH <sub>3</sub> COOH (IM13→IM14)             | -1035.141901 |
| TS21 (IM14→P10)                                   | -806.098646  |
| TS22 (IM13→IM15)                                  | -806.094807  |
| TS22-H <sub>2</sub> O (IM13→IM15)                 | -882.529890  |
| TS22-NH <sub>3</sub> (IM13→IM15)                  | -862.651939  |
| TS22-CH <sub>3</sub> OH (IM13→IM15)               | -921.801002  |
| TS22-C <sub>2</sub> H <sub>5</sub> OH (IM13→IM15) | -961.085028  |
| TS22-HCOOH (IM13→IM15)                            | -995.866128  |
| TS22-CH <sub>3</sub> COOH (IM13→IM15)             | -1035.159203 |
| TS23 (IM15→P11)                                   | -806.104630  |
| TS24 (IBU→IMs1)                                   | -732.138015  |
| TS25 (IBU→IMs2)                                   | -732.139312  |
| TS26 (IBU→IMs3)                                   | -732.140048  |
| TS27 (IBU→IMs4)                                   | -732.139730  |
| TS28 (IBU→IMs5)                                   | -732.133981  |
| TS29 (IBU→IMs6a)                                  | -732.141475  |
| TS30 (IBU→IMs6s)                                  | -732.142105  |
| TS31 (IBU→IMs7a)                                  | -732.143671  |
| TS32 (IBU→IMs7s)                                  | -732.142340  |
| TS33 (IBU→IMs8a)                                  | -732.144479  |
| TS34 (IBU→IMs8s)                                  | -732.144223  |
| TS35 (IBU→IMs9a)                                  | -732.136411  |
| TS36 (IBU→IMs9s)                                  | -732.144362  |
| TS37 (IBU→IMs10a)                                 | -732.144057  |
| TS38 (IBU→IMs10s)                                 | -732.143442  |
| TS39 (IBU→IMs11a)                                 | -732.142711  |

|                                                   |             |
|---------------------------------------------------|-------------|
| TS40 (IBU→IMs11s)                                 | -732.142810 |
| TS41 (IBU→IMs12)                                  | -732.122162 |
| ·OH                                               | -75.746516  |
| OH <sup>-</sup>                                   | -75.949068  |
| H <sub>2</sub> O                                  | -76.433568  |
| HO <sub>2</sub>                                   | -150.920137 |
| (CH <sub>3</sub> ) <sub>2</sub> C=CH <sub>2</sub> | -157.108341 |
| O <sub>2</sub>                                    | -150.335287 |
| CH <sub>3</sub>                                   | -39.809189  |
| CH <sub>3</sub> CHOHCH <sub>3</sub>               | -194.260230 |
| CH <sub>3</sub> CH=CH <sub>2</sub>                | -117.823333 |
| (CH <sub>3</sub> ) <sub>2</sub> C=CHOOH           | -307.467840 |
| NH <sub>3</sub>                                   | -56.538567  |
| CH <sub>3</sub> OH                                | -115.690550 |
| C <sub>2</sub> H <sub>5</sub> OH                  | -154.974756 |
| HCOOH                                             | -189.761056 |
| CH <sub>3</sub> COOH                              | -229.055131 |

---

**Table S3.** The  $\Delta G^*$  (in kcal/mol) of H transfer reactions in the subsequent reactions of IM2 catalyzed by NDM.

| Reactions               | NDM                              | $\Delta G^*$ |
|-------------------------|----------------------------------|--------------|
| IM13 $\rightarrow$ IM14 | H <sub>2</sub> O                 | 32.00        |
| IM13 $\rightarrow$ IM14 | NH <sub>3</sub>                  | 18.83        |
| IM13 $\rightarrow$ IM14 | CH <sub>3</sub> OH               | 22.38        |
| IM13 $\rightarrow$ IM14 | C <sub>2</sub> H <sub>5</sub> OH | 22.73        |
| IM13 $\rightarrow$ IM14 | HCOOH                            | 23.35        |
| IM13 $\rightarrow$ IM14 | CH <sub>3</sub> COOH             | 24.66        |
| IM13 $\rightarrow$ IM15 | H <sub>2</sub> O                 | 31.22        |
| IM13 $\rightarrow$ IM15 | NH <sub>3</sub>                  | 20.52        |
| IM13 $\rightarrow$ IM15 | CH <sub>3</sub> OH               | 22.35        |
| IM13 $\rightarrow$ IM15 | C <sub>2</sub> H <sub>5</sub> OH | 22.46        |
| IM13 $\rightarrow$ IM15 | HCOOH                            | 25.73        |
| IM13 $\rightarrow$ IM15 | CH <sub>3</sub> COOH             | 26.36        |

**Table S4.** Estimated values for acute and chronic toxicity of IBU and its degradation products.

| Compounds | Fish             |      | Daphnid          |      | Green Algae      |      |
|-----------|------------------|------|------------------|------|------------------|------|
|           | LC <sub>50</sub> | ChV  | LC <sub>50</sub> | ChV  | EC <sub>50</sub> | ChV  |
| IBU       | 41.6             | 4.94 | 27.8             | 4.31 | 41.1             | 15.6 |
| P1        | 11.1             | 9.45 | 30.8             | 16.4 | 5.05             | 2.03 |
| P2        | 736              | 75.4 | 435              | 47.4 | 382              | 110  |
| P3        | 175              | 30.9 | 167              | 1.72 | 93.4             | 34.4 |
| P4        | 142              | 15.7 | 89.6             | 11.8 | 104              | 34.6 |
| P5        | 402              | 37.6 | 328              | 57.8 | 157              | 84.8 |
| P6        | 618              | 57.4 | 201              | 19.7 | 763              | 97   |
| P7        | 10.8             | 8.91 | 29.7             | 15.5 | 4.91             | 1.98 |
| P8        | 6830             | 620  | 3640             | 299  | 2100             | 478  |
| P9        | 1000             | 101  | 584              | 61.4 | 486              | 135  |
| P10       | 49.1             | 5.78 | 32.6             | 4.94 | 46.7             | 17.4 |
| P11       | 41.7             | 4.95 | 27.9             | 4.31 | 41.2             | 15.6 |

Note: the acute (LC<sub>50</sub>/EC<sub>50</sub>) and chronic (ChV) toxicity classification (mg L<sup>-1</sup>) are defined as follows:

| Classification     | Acute toxicity <sup>1</sup>                            | Chronic toxicity <sup>2</sup> |
|--------------------|--------------------------------------------------------|-------------------------------|
| <b>Not harmful</b> | LC <sub>50</sub> >100 or EC <sub>50</sub> >100         | ChV>10                        |
| <b>Harmful</b>     | 10< LC <sub>50</sub> <100 or 10< EC <sub>50</sub> <100 | 1< ChV <10                    |
| <b>Toxic</b>       | 1< LC <sub>50</sub> <10 or 1< EC <sub>50</sub> <10     | 0.1< ChV <1                   |

<sup>1</sup> Criteria set by the European Union (described in Annex VI of Directive 67/548/EEC); <sup>2</sup>Criteria set by the Chinese hazard evaluation guidelines for new chemical substances (HJ/T 154–2004).



**Table S5.** Estimated values for developmental toxicity, mutagenicity and bioconcentration factors of IBU and its degradation products.

| Compounds | Developmental toxicity | Mutagenicity | Bioconcentration factors |
|-----------|------------------------|--------------|--------------------------|
| IBU       | 0.90                   | -0.05        | 19.80                    |
| P1        | 0.82                   | 0.53         | N/A                      |
| P2        | 0.96                   | 0.38         | 2.74                     |
| P3        | 0.84                   | 0.53         | N/A                      |
| P4        | 0.86                   | 0.16         | 7.84                     |
| P5        | 0.88                   | 0.02         | 4.10                     |
| P6        | 0.52                   | 0.37         | 1.18                     |
| P7        | 0.77                   | 0.58         | N/A                      |
| P8        | 0.87                   | -0.04        | 2.88                     |
| P9        | 0.69                   | 0.01         | 6.03                     |
| P10       | 0.89                   | -0.01        | 10.13                    |
| P11       | 0.91                   | 0.13         | 6.91                     |

Note: Developmental toxicity < 0.50: developmental non-toxicant, and developmental toxicity > 0.50: developmental toxicant. Ames mutagenicity  $\leq$  0.50: Ames mutagenicity negative, and Ames mutagenicity > 0.50: mutagenicity positive.

**Table S6.** Estimated health effects of IBU and its degradation products.

| Compounds | Genotoxic carcinogenicity | Skin irritation and corrosion   |
|-----------|---------------------------|---------------------------------|
| IBU       | Negative                  | Irritating to skin              |
| P1        | Negative                  | Irritating to skin              |
| P2        | Negative                  | Irritating to skin              |
| P3        | Structural Alert          | Irritating or Corrosive to skin |
| P4        | Negative                  | Irritating to skin              |
| P5        | Negative                  | Irritating to skin              |
| P6        | Negative                  | Irritating or Corrosive to skin |
| P7        | Negative                  | Irritating to skin              |
| P8        | Negative                  | Irritating to skin              |
| P9        | Negative                  | Irritating to skin              |
| P10       | Negative                  | Irritating to skin              |
| P11       | Structural Alert          | Irritating to skin              |

**Figure S1**

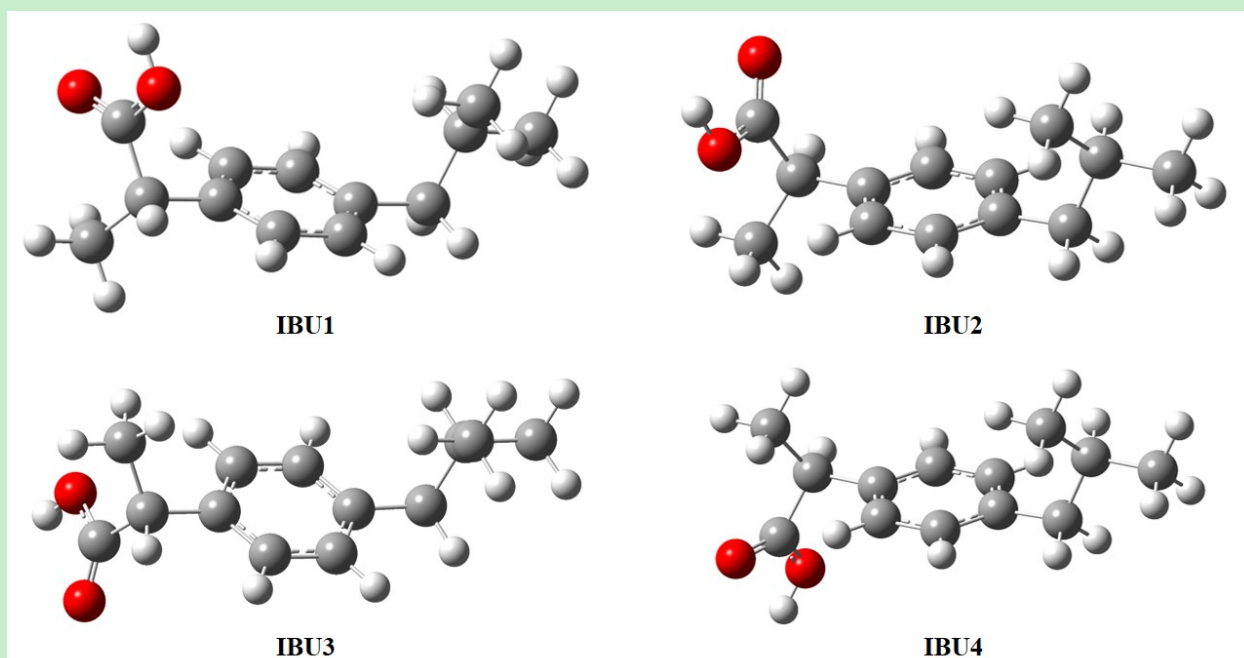

**Figure S1.** Four stable isomers of IBU. White ball, grey ball and red ball denote H atom, C atom and O atom, respectively.

**Figure S2**

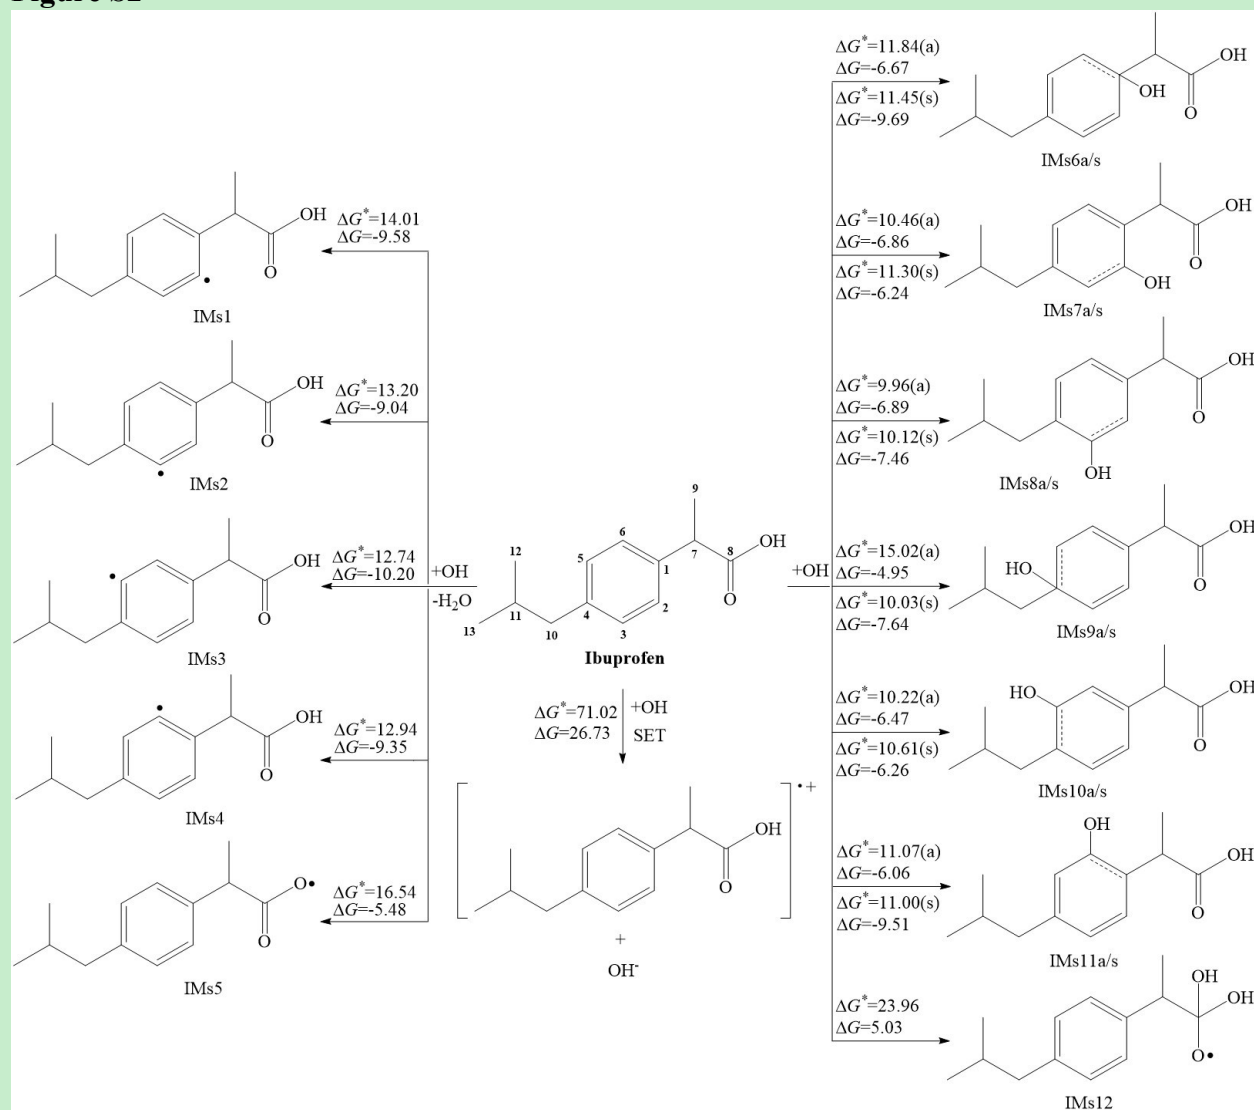

**Figure S2.** The H-abstraction and OH-addition at benzene ring and carboxyl group and SET of initial reaction of IBU and  $\cdot\text{OH}$  embedded with  $\Delta G^*$  (in kcal/mol) and  $\Delta G$  (in kcal/mol). The ‘a’ and ‘s’ denote *anti*- and *syn*-position with respect to the carboxyl group, respectively.

Figure S3

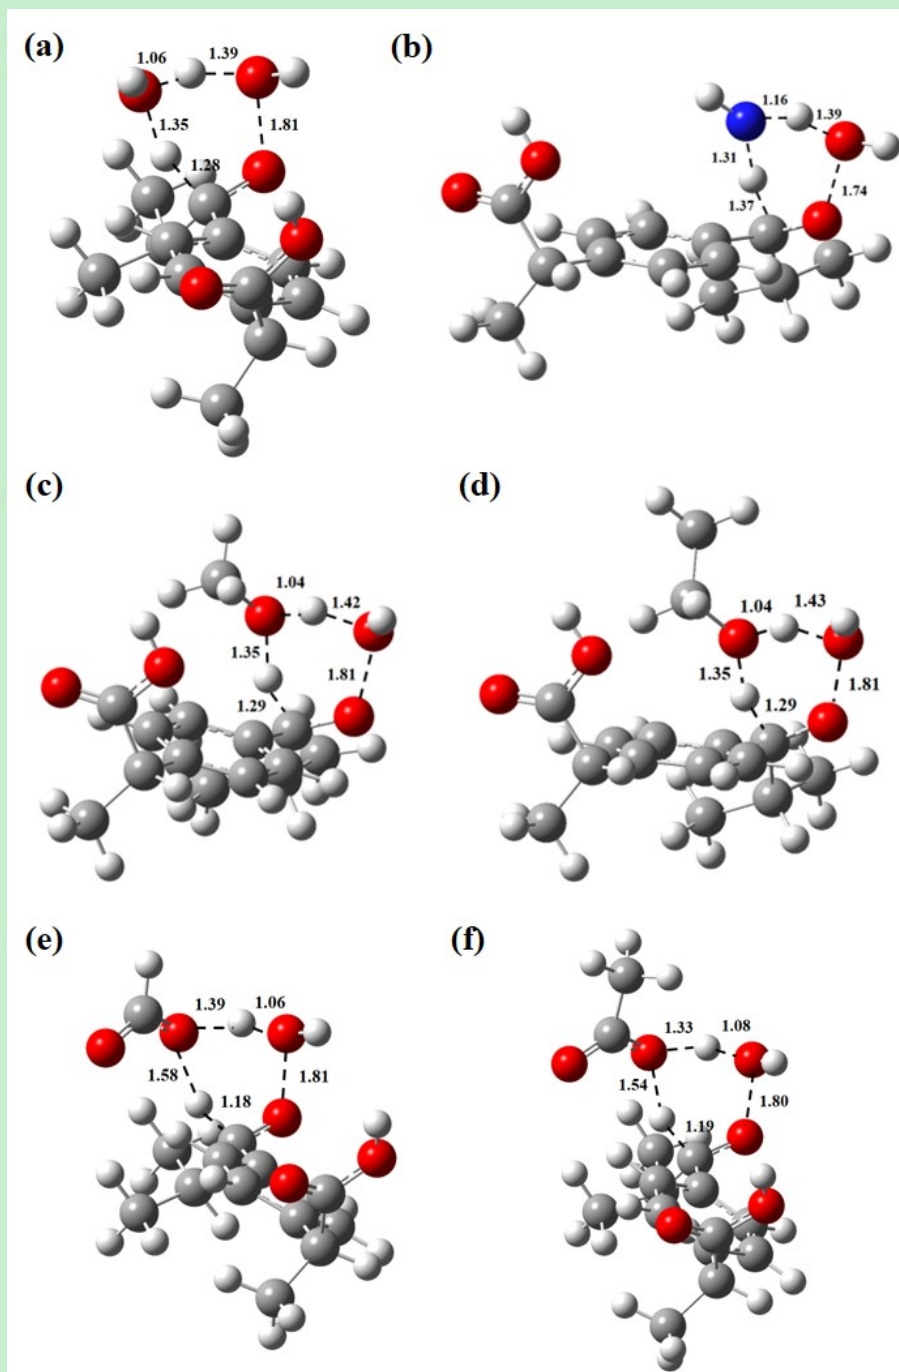

**Figure S3.** Structures of the transition states of the reaction  $P1 \rightarrow P2 + H_2O$  catalyzed by NDM.

The NDM in (a), (b), (c), (d), (e) and (f) are  $H_2O$ ,  $NH_3$ ,  $CH_3OH$ ,  $C_2H_5OH$ ,  $HCOOH$  and  $CH_3COOH$ , respectively. The unit of distance is angstrom ( $\text{\AA}$ ).

**Text S1.**

The Cartesian coordinates of optimized structures involved in this work.

IBU

|   |             |             |             |
|---|-------------|-------------|-------------|
| C | -0.87683900 | -0.94775400 | 0.98266200  |
| C | 0.44931300  | -0.66587100 | 1.29525900  |
| C | 1.25848700  | 0.02561700  | 0.39488300  |
| C | 0.71455500  | 0.41853600  | -0.82840100 |
| C | -0.61110000 | 0.13182700  | -1.13813900 |
| C | -1.42923700 | -0.55207900 | -0.23707200 |
| H | -1.49180100 | -1.48719200 | 1.69672000  |
| H | 0.85885600  | -0.98693200 | 2.24748600  |
| H | 1.33032300  | 0.95083500  | -1.54722300 |
| H | -1.01802900 | 0.44747200  | -2.09365900 |
| C | -2.88116600 | -0.82281500 | -0.54003000 |
| H | -3.06748200 | -0.67647500 | -1.60974300 |
| H | -3.11172700 | -1.86881900 | -0.31220800 |
| C | -3.84368300 | 0.07830500  | 0.25538600  |
| H | -3.64622500 | -0.08399500 | 1.32204600  |
| C | -5.29007900 | -0.31756700 | -0.03597000 |
| H | -5.46960100 | -1.36946400 | 0.20003300  |
| H | -5.98662700 | 0.28785700  | 0.54899500  |
| H | -5.51906500 | -0.16426900 | -1.09560000 |
| C | -3.61284600 | 1.55558300  | -0.06011200 |
| H | -2.59701600 | 1.86845300  | 0.19216400  |
| H | -3.76850500 | 1.74378300  | -1.12795300 |
| H | -4.31061500 | 2.18450600  | 0.49808600  |
| C | 2.70121500  | 0.36186200  | 0.74133500  |
| H | 2.93355300  | -0.10377300 | 1.70205500  |
| C | 2.94435000  | 1.86826400  | 0.81203200  |
| H | 2.29103800  | 2.30796800  | 1.56666400  |
| H | 3.98151100  | 2.08248200  | 1.07542600  |
| H | 2.73190000  | 2.33831400  | -0.14923800 |

|   |            |             |             |
|---|------------|-------------|-------------|
| C | 3.60115800 | -0.28601600 | -0.29076800 |
| O | 4.14106500 | 0.28510800  | -1.20419300 |
| O | 3.71551700 | -1.60771200 | -0.09756400 |
| H | 4.26209000 | -1.97727200 | -0.80638000 |

IM1

|   |             |             |             |
|---|-------------|-------------|-------------|
| C | -1.00191100 | 0.52752600  | 0.80672900  |
| C | 0.33957400  | 0.82162200  | 0.98982700  |
| C | 1.30447000  | 0.40279300  | 0.07057600  |
| C | 0.88739700  | -0.33224700 | -1.04963100 |
| C | -0.44531900 | -0.63506500 | -1.24157700 |
| C | -1.44029800 | -0.21546000 | -0.31879300 |
| H | -1.72187500 | 0.87570300  | 1.53786500  |
| H | 0.64630600  | 1.39114100  | 1.86123700  |
| H | 1.62236700  | -0.67302100 | -1.77294600 |
| H | -0.74840300 | -1.20798900 | -2.11175100 |
| C | -2.80041200 | -0.54311900 | -0.54104000 |
| H | -3.04115200 | -1.09058100 | -1.44869200 |
| C | -3.93847300 | -0.13717400 | 0.34298100  |
| H | -3.61456200 | -0.19301300 | 1.38888300  |
| C | -5.13035200 | -1.07855500 | 0.15954200  |
| H | -4.85814800 | -2.11115000 | 0.38911400  |
| H | -5.95692800 | -0.78721300 | 0.81118300  |
| H | -5.48559300 | -1.04171500 | -0.87472200 |
| C | -4.35453600 | 1.31775300  | 0.05697400  |
| H | -3.51833200 | 2.00602300  | 0.19744000  |
| H | -4.70420900 | 1.41224400  | -0.97495200 |
| H | -5.16740800 | 1.61917700  | 0.72277000  |
| C | 2.77036000  | 0.75140000  | 0.25987200  |
| H | 2.88237500  | 1.22501300  | 1.23810700  |
| C | 3.29129100  | 1.67820400  | -0.83807500 |
| H | 2.71489400  | 2.60412000  | -0.83643700 |

|   |            |             |             |
|---|------------|-------------|-------------|
| H | 4.34374900 | 1.91748800  | -0.67688500 |
| H | 3.19230500 | 1.20778100  | -1.81747600 |
| C | 3.56474200 | -0.53880900 | 0.30114700  |
| O | 4.22379200 | -0.98174300 | -0.60491100 |
| O | 3.42878000 | -1.17519600 | 1.47326600  |
| H | 3.91484600 | -2.01170600 | 1.42922700  |

IM2

|   |             |             |             |
|---|-------------|-------------|-------------|
| C | -0.99658800 | -0.60587000 | 0.98937700  |
| C | 0.31967100  | -0.30032600 | 1.31634700  |
| C | 1.21127000  | 0.13539500  | 0.33531000  |
| C | 0.75772300  | 0.25000800  | -0.97814200 |
| C | -0.55995500 | -0.06233200 | -1.30254200 |
| C | -1.45536400 | -0.49349400 | -0.32460600 |
| H | -1.68263400 | -0.93545700 | 1.76394400  |
| H | 0.65885500  | -0.39886100 | 2.34231500  |
| H | 1.43658200  | 0.58430400  | -1.75698400 |
| H | -0.89649300 | 0.03286500  | -2.32983900 |
| C | -2.89683800 | -0.81936100 | -0.65042900 |
| H | -3.04013800 | -0.73646800 | -1.73979400 |
| H | -3.09652400 | -1.86572200 | -0.39517400 |
| C | -3.88392300 | 0.05998900  | 0.06573500  |
| C | -5.24661600 | -0.48960400 | 0.33450700  |
| H | -5.20224700 | -1.52464000 | 0.68311700  |
| H | -5.77711100 | 0.10756800  | 1.08078200  |
| H | -5.86562800 | -0.48372600 | -0.57710500 |
| C | -3.73712300 | 1.54112100  | -0.06945000 |
| H | -2.69051700 | 1.85263900  | -0.02338400 |
| H | -4.13544200 | 1.88813300  | -1.03659700 |
| H | -4.29168300 | 2.06904500  | 0.71066500  |
| C | 2.64549300  | 0.49863700  | 0.68972700  |
| H | 2.80578200  | 0.25362300  | 1.74233200  |



|   |            |             |             |
|---|------------|-------------|-------------|
| C | 2.94846900 | 1.97521200  | 0.44144400  |
| H | 2.27886000 | 2.59116800  | 1.04305200  |
| H | 3.97950400 | 2.21066000  | 0.71069200  |
| H | 2.80368200 | 2.22771300  | -0.60994700 |
| C | 3.57336000 | -0.38862900 | -0.11483600 |
| O | 4.18852200 | -0.05030200 | -1.09413700 |
| O | 3.61768700 | -1.63797100 | 0.36928800  |
| H | 4.18801100 | -2.17113700 | -0.20393600 |

### IM3

|   |             |             |             |
|---|-------------|-------------|-------------|
| C | -0.90014100 | -1.05829200 | 0.94866800  |
| C | 0.43154200  | -0.80327700 | 1.26402100  |
| C | 1.22609000  | -0.03507300 | 0.41482500  |
| C | 0.66194000  | 0.46536200  | -0.76012700 |
| C | -0.66763900 | 0.20578700  | -1.07280600 |
| C | -1.47052000 | -0.55819600 | -0.22270800 |
| H | -1.50469900 | -1.65875600 | 1.62183900  |
| H | 0.85585300  | -1.20571600 | 2.17802500  |
| H | 1.26634600  | 1.06064200  | -1.43823700 |
| H | -1.09130700 | 0.60331800  | -1.98985800 |
| C | -2.92661100 | -0.79371700 | -0.52759100 |
| H | -3.10931400 | -0.66670700 | -1.59935400 |
| H | -3.19868900 | -1.82110900 | -0.26509700 |
| C | -3.86559100 | 0.16998000  | 0.24846100  |
| H | -3.66910000 | 0.01037300  | 1.31568900  |
| C | -5.32431700 | -0.18442600 | -0.04836400 |
| H | -5.53181200 | -1.22875900 | 0.19661500  |
| H | -6.00411300 | 0.44675200  | 0.52772200  |
| H | -5.54037500 | -0.03447300 | -1.11057700 |
| C | -3.57806800 | 1.59645000  | -0.08451800 |
| H | -2.77827400 | 2.13661800  | 0.40512400  |
| H | -4.06136600 | 2.05986300  | -0.93751100 |

|   |            |             |             |
|---|------------|-------------|-------------|
| C | 2.67286500 | 0.27588500  | 0.76695900  |
| H | 2.93392100 | -0.29769800 | 1.65951200  |
| C | 2.89825100 | 1.76652200  | 1.01339200  |
| H | 2.26409400 | 2.09940500  | 1.83604900  |
| H | 3.94032000 | 1.96546100  | 1.26905500  |
| H | 2.64709700 | 2.34607000  | 0.12387200  |
| C | 3.55736200 | -0.23011400 | -0.35404000 |
| O | 4.07625200 | 0.45500200  | -1.19838400 |
| O | 3.68297400 | -1.56462700 | -0.32919700 |
| H | 4.21663600 | -1.83963300 | -1.08925100 |

#### IM4

|   |             |             |             |
|---|-------------|-------------|-------------|
| C | 0.72007700  | -1.15413800 | 0.12319500  |
| C | -0.63478200 | -0.99325600 | -0.10703800 |
| C | -1.27612300 | 0.24025300  | 0.15708900  |
| C | -0.46799800 | 1.28796700  | 0.65367400  |
| C | 0.88377600  | 1.10692200  | 0.89567000  |
| C | 1.50761400  | -0.11581900 | 0.63434800  |
| H | 1.18345500  | -2.11090400 | -0.09741500 |
| H | -1.20073500 | -1.81885000 | -0.51168600 |
| H | -0.91182600 | 2.25103400  | 0.87270900  |
| H | 1.46909400  | 1.93028000  | 1.29212500  |
| C | 2.98416400  | -0.31203100 | 0.84557500  |
| H | 3.37367400  | 0.48165200  | 1.49223800  |
| H | 3.15159400  | -1.26370000 | 1.36067800  |
| C | 3.78827800  | -0.31730800 | -0.46930300 |
| H | 3.38223900  | -1.11312800 | -1.10539400 |
| C | 5.25510000  | -0.62973200 | -0.17791900 |
| H | 5.36300500  | -1.59182200 | 0.32909800  |
| H | 5.83867600  | -0.66215800 | -1.10098300 |
| H | 5.68702700  | 0.14293700  | 0.46627200  |
| C | 3.65363700  | 1.01190400  | -1.21037900 |

|   |             |             |             |
|---|-------------|-------------|-------------|
| H | 2.61456200  | 1.22573800  | -1.47147600 |
| H | 4.02048000  | 1.83305800  | -0.58506500 |
| H | 4.24050900  | 1.00215600  | -2.13200900 |
| C | -2.67497100 | 0.49834400  | -0.09744400 |
| C | -3.16948000 | 1.90701300  | -0.20789300 |
| H | -2.47657800 | 2.52410800  | -0.78213600 |
| H | -4.14757000 | 1.92800100  | -0.68276100 |
| H | -3.27285200 | 2.36410300  | 0.78374000  |
| C | -3.70568100 | -0.53448900 | -0.20331600 |
| O | -4.85332100 | -0.31336700 | -0.54612200 |
| O | -3.32232900 | -1.77907400 | 0.14756000  |
| H | -4.09122500 | -2.35675900 | 0.04300400  |

#### IM5

|   |             |             |             |
|---|-------------|-------------|-------------|
| C | 0.80174600  | -1.07433400 | -0.78989700 |
| C | -0.51674600 | -0.80897500 | -1.14618200 |
| C | -1.28293800 | 0.08273400  | -0.39835500 |
| C | -0.70903300 | 0.69980100  | 0.71325200  |
| C | 0.60793400  | 0.42729300  | 1.06752500  |
| C | 1.38522400  | -0.46126400 | 0.32117000  |
| H | 1.38646300  | -1.77080900 | -1.38307900 |
| H | -0.95311700 | -1.29932500 | -2.01006200 |
| H | -1.29570700 | 1.39786600  | 1.30241200  |
| H | 1.04200900  | 0.91521400  | 1.93436000  |
| C | 2.82860800  | -0.72531600 | 0.66682700  |
| H | 3.02594400  | -0.40205200 | 1.69482300  |
| H | 3.02068100  | -1.80223500 | 0.62404500  |
| C | 3.81833900  | -0.01071200 | -0.27234600 |
| H | 3.60719300  | -0.34502200 | -1.29536500 |
| C | 5.25075200  | -0.40787900 | 0.08166400  |
| H | 5.38906200  | -1.49030900 | 0.02255500  |
| H | 5.96664600  | 0.06551300  | -0.59445500 |

|   |             |             |             |
|---|-------------|-------------|-------------|
| H | 5.49141200  | -0.09108300 | 1.10160200  |
| C | 3.64758100  | 1.50658200  | -0.21354100 |
| H | 2.64280300  | 1.81200100  | -0.51405500 |
| H | 3.81943000  | 1.86759700  | 0.80626600  |
| H | 4.36503000  | 2.00243700  | -0.87173500 |
| C | -2.73815300 | 0.37915500  | -0.77511300 |
| H | -2.93205200 | -0.12720300 | -1.72692400 |
| C | -3.01181700 | 1.83940000  | -0.88835900 |
| H | -3.63508400 | 2.34420700  | -0.16518100 |
| H | -2.51064000 | 2.40563700  | -1.66018300 |
| C | -3.62303500 | -0.27844600 | 0.26827800  |
| O | -4.17754400 | 0.29046200  | 1.17277300  |
| O | -3.69216500 | -1.60378400 | 0.09199500  |
| H | -4.22316700 | -1.98408500 | 0.80729200  |

#### IM6

|   |             |             |             |
|---|-------------|-------------|-------------|
| C | 0.59156400  | -0.15695600 | -1.20503900 |
| C | -0.76437600 | 0.04713000  | -1.43083600 |
| C | -1.63292100 | 0.28814800  | -0.36619600 |
| C | -1.12161800 | 0.30873400  | 0.93136700  |
| C | 0.23284100  | 0.09005800  | 1.15967700  |
| C | 1.09966900  | -0.13723200 | 0.09385800  |
| H | 1.25483000  | -0.34073400 | -2.04379600 |
| H | -1.15119700 | 0.02290000  | -2.44368900 |
| H | -1.78542000 | 0.48894800  | 1.77133600  |
| H | 0.61789700  | 0.10118700  | 2.17369900  |
| C | 2.57448100  | -0.31680600 | 0.33992500  |
| H | 2.77217800  | -0.44365000 | 1.40849800  |
| C | 3.45748400  | 0.78645700  | -0.24108100 |
| H | 3.31412300  | 0.78144600  | -1.32801900 |
| C | 4.93013000  | 0.52354000  | 0.07559500  |
| H | 5.26581100  | -0.43852500 | -0.31383100 |

|   |             |             |             |
|---|-------------|-------------|-------------|
| H | 5.55308400  | 1.30518100  | -0.36339400 |
| H | 5.09076500  | 0.53231600  | 1.15804800  |
| C | 3.01920000  | 2.14531200  | 0.30745500  |
| H | 1.99806100  | 2.39388100  | 0.01336200  |
| H | 3.07264700  | 2.15323900  | 1.40079400  |
| H | 3.68416000  | 2.92557800  | -0.06693300 |
| C | -3.10978500 | 0.55099300  | -0.61426800 |
| H | -3.31554500 | 0.35563000  | -1.66940900 |
| C | -3.50199000 | 1.98353900  | -0.25628100 |
| H | -2.91368800 | 2.68167600  | -0.85308400 |
| H | -4.56094500 | 2.15644400  | -0.45389100 |
| H | -3.31231000 | 2.18197100  | 0.79962300  |
| C | -3.91840600 | -0.45272900 | 0.18337900  |
| O | -4.51717300 | -0.21535000 | 1.20106700  |
| O | -3.87228400 | -1.67619700 | -0.36121800 |
| H | -4.36740800 | -2.28651800 | 0.20480400  |
| O | 2.57543000  | -2.61518600 | 0.30284100  |
| O | 3.01969200  | -1.55978000 | -0.30012100 |

#### IM7

|   |             |             |             |
|---|-------------|-------------|-------------|
| C | 0.61349200  | 1.68147000  | 0.37832900  |
| C | -0.76025200 | 1.60152600  | 0.55923400  |
| C | -1.42581900 | 0.38804500  | 0.38607700  |
| C | -0.68910400 | -0.74329700 | 0.03157600  |
| C | 0.68788500  | -0.66873400 | -0.13404500 |
| C | 1.35517800  | 0.54763600  | 0.03595900  |
| H | 1.12869200  | 2.62566300  | 0.50615500  |
| H | -1.32138000 | 2.48719300  | 0.83602200  |
| H | -1.19343300 | -1.69266800 | -0.11817600 |
| H | 1.22547700  | -1.56290100 | -0.41687200 |
| C | 2.83480000  | 0.71763500  | -0.15836000 |
| C | 3.80764000  | -0.44225200 | 0.01543500  |

|   |             |             |             |
|---|-------------|-------------|-------------|
| H | 4.76856000  | 0.05926400  | 0.15690000  |
| C | 3.91623000  | -1.26606700 | -1.27765500 |
| H | 4.14610000  | -0.62459600 | -2.13054000 |
| H | 4.72376100  | -1.99329400 | -1.17096500 |
| H | 3.00095900  | -1.81631500 | -1.50038800 |
| C | 3.54142900  | -1.31233600 | 1.24771200  |
| H | 3.37774000  | -0.70088100 | 2.13794300  |
| H | 2.67839000  | -1.96645300 | 1.12208500  |
| H | 4.41285400  | -1.94473700 | 1.42958700  |
| C | -2.92539900 | 0.28646900  | 0.60932900  |
| H | -3.31795600 | 1.29801500  | 0.73628000  |
| C | -3.26124800 | -0.56773400 | 1.83105100  |
| H | -2.79978500 | -0.13292600 | 2.71835300  |
| H | -4.34043900 | -0.61588500 | 1.98278800  |
| H | -2.88587300 | -1.58418700 | 1.70483900  |
| C | -3.56358300 | -0.27816400 | -0.64509900 |
| O | -3.98155700 | -1.40043800 | -0.77035300 |
| O | -3.58835700 | 0.62061900  | -1.63818000 |
| H | -3.96858600 | 0.20333900  | -2.42529300 |
| O | 3.28957385  | 1.87400592  | -0.46223444 |
| O | 3.44708434  | 2.20159926  | -1.69496236 |
| H | 2.87649407  | 2.00382586  | -2.48700303 |

#### IM8

|   |             |             |             |
|---|-------------|-------------|-------------|
| C | -0.58493200 | -0.49289300 | 1.02644400  |
| C | 0.75977000  | -0.31005400 | 1.33123700  |
| C | 1.65148100  | 0.15774700  | 0.36669400  |
| C | 1.17493500  | 0.42741900  | -0.91698800 |
| C | -0.16561800 | 0.23241400  | -1.22873400 |
| C | -1.05803700 | -0.22553900 | -0.25921100 |
| H | -1.26769400 | -0.85350500 | 1.78699300  |
| H | 1.11883100  | -0.53040300 | 2.33091800  |

|   |             |             |             |
|---|-------------|-------------|-------------|
| H | 1.85670800  | 0.78207700  | -1.68375500 |
| H | -0.52094700 | 0.43524100  | -2.23379500 |
| C | -2.53280500 | -0.34853000 | -0.58727500 |
| H | -2.65480900 | -0.42151400 | -1.67515400 |
| C | -3.29820600 | 0.83269100  | -0.06929200 |
| H | -4.32894000 | -2.38021000 | -0.99007800 |
| C | -3.26040300 | 2.07763800  | -0.88997500 |
| H | -3.28102200 | 1.85902800  | -1.96094500 |
| H | -4.10470000 | 2.72930800  | -0.65025600 |
| H | -2.34444300 | 2.65662600  | -0.69348900 |
| C | -3.56505000 | 0.93811000  | 1.39509400  |
| H | -3.73693700 | -0.04157400 | 1.84514300  |
| H | -2.71748000 | 1.40322800  | 1.92196300  |
| H | -4.43830700 | 1.56884300  | 1.58184400  |
| C | 3.11691700  | 0.38660700  | 0.70436300  |
| H | 3.28645500  | 0.03888000  | 1.72599600  |
| C | 3.51764200  | 1.85456300  | 0.57142100  |
| H | 2.90645000  | 2.46192900  | 1.24009900  |
| H | 4.56835800  | 1.99450000  | 0.82996000  |
| H | 3.36742100  | 2.20410000  | -0.45084800 |
| C | 3.95476900  | -0.49088500 | -0.20404700 |
| O | 4.56141400  | -0.11320400 | -1.17379300 |
| O | 3.92429000  | -1.77631200 | 0.17462800  |
| H | 4.43594500  | -2.29826200 | -0.46078800 |
| O | -4.33613300 | -1.75940200 | -0.24825300 |
| O | -2.95053100 | -1.58158600 | 0.00964400  |

#### IM9

|   |            |             |             |
|---|------------|-------------|-------------|
| C | 2.70487700 | 0.71838400  | 0.62664800  |
| C | 1.37316300 | 0.66406800  | 1.05288700  |
| C | 0.42548700 | -0.06544200 | 0.33505500  |
| C | 0.80843500 | -0.74542100 | -0.82490500 |

|   |             |             |             |
|---|-------------|-------------|-------------|
| C | 2.13057100  | -0.70217500 | -1.27288600 |
| C | 3.01762600  | 0.03036800  | -0.51969600 |
| H | 3.44316800  | 1.28193000  | 1.18522800  |
| H | 1.07677600  | 1.19505100  | 1.95160900  |
| H | 0.07207000  | -1.31002900 | -1.38935600 |
| H | 2.42852500  | -1.22674800 | -2.17318200 |
| C | -1.01574700 | -0.14137100 | 0.81818400  |
| H | -1.12046600 | 0.53198600  | 1.67206800  |
| C | -1.41922800 | -1.56021100 | 1.21417500  |
| H | -0.76366700 | -1.91704700 | 2.00943300  |
| H | -2.45026300 | -1.58423500 | 1.57028900  |
| H | -1.33536400 | -2.23787400 | 0.36343200  |
| C | -1.91637000 | 0.39658000  | -0.27616600 |
| O | -2.59718100 | -0.27249800 | -1.01108900 |
| O | -1.85193700 | 1.73206500  | -0.36493500 |
| H | -2.41071500 | 2.02175200  | -1.10110200 |

#### IM10

|   |             |             |             |
|---|-------------|-------------|-------------|
| C | -0.51937200 | -0.16269700 | 1.21339500  |
| C | 0.84350900  | 0.00200200  | 1.43588500  |
| C | 1.71396100  | 0.23098300  | 0.37116800  |
| C | 1.19670700  | 0.28001600  | -0.92387500 |
| C | -0.16342900 | 0.09939200  | -1.14844100 |
| C | -1.03482000 | -0.11729400 | -0.08233600 |
| H | -1.18327300 | -0.33521500 | 2.05353500  |
| H | 1.23341300  | -0.04328700 | 2.44699900  |
| H | 1.86093400  | 0.45470900  | -1.76487100 |
| H | -0.55122100 | 0.13452300  | -2.16092200 |
| C | -2.51608400 | -0.27618700 | -0.32155000 |
| H | -2.71125300 | -0.36164900 | -1.39591600 |
| C | -3.33662600 | 0.89904400  | 0.26519700  |
| H | -3.09948800 | 0.93185000  | 1.33513400  |



|   |             |             |             |
|---|-------------|-------------|-------------|
| C | -4.80505000 | 0.69868100  | 0.09970600  |
| H | -3.71359000 | -2.71704600 | -0.87882800 |
| H | -5.37842800 | 0.14247100  | 0.82809800  |
| H | -5.27096600 | 0.92839100  | -0.85189300 |
| C | -2.89211100 | 2.21184700  | -0.39159900 |
| H | -1.83710100 | 2.41937300  | -0.20383900 |
| H | -3.04551600 | 2.16543800  | -1.47442600 |
| H | -3.48244800 | 3.04346000  | -0.00353600 |
| C | 3.19797200  | 0.45512700  | 0.61492100  |
| H | 3.40461200  | 0.23817600  | 1.66577400  |
| C | 3.62201000  | 1.88340500  | 0.27726700  |
| H | 3.05170600  | 2.58565400  | 0.88657600  |
| H | 4.68536400  | 2.02952600  | 0.47300100  |
| H | 3.43287100  | 2.10191800  | -0.77481100 |
| C | 3.97901500  | -0.55411300 | -0.20256500 |
| O | 4.58158200  | -0.31408000 | -1.21752300 |
| O | 3.90344700  | -1.78595200 | 0.31989900  |
| H | 4.38214000  | -2.39763100 | -0.25856800 |
| O | -4.05682800 | -2.02685600 | -0.29390600 |
| O | -2.86468200 | -1.52584900 | 0.29596200  |

#### IM11

|   |             |             |             |
|---|-------------|-------------|-------------|
| C | 1.35335500  | 0.78375300  | 0.68856700  |
| C | 0.00489500  | 0.89111000  | 0.98330900  |
| C | -0.92994700 | 0.00590500  | 0.43925100  |
| C | -0.47689900 | -1.00137700 | -0.42663800 |
| C | 0.86212500  | -1.12284000 | -0.73685100 |
| C | 1.81649000  | -0.23393200 | -0.18019000 |
| H | 2.06205400  | 1.47525200  | 1.12683300  |
| H | -0.33261100 | 1.67560300  | 1.65242800  |
| H | -1.18874000 | -1.69423000 | -0.86464300 |
| H | 1.19510100  | -1.90415400 | -1.41103500 |

|   |             |             |             |
|---|-------------|-------------|-------------|
| C | 3.17757600  | -0.38306700 | -0.51269600 |
| H | 3.57457200  | -1.16378200 | -1.14801300 |
| H | 5.89228300  | 0.49987500  | -0.44992500 |
| C | -2.40454900 | 0.11629600  | 0.78614100  |
| H | -2.53981400 | 1.00500300  | 1.40676000  |
| C | -2.92496000 | -1.12080800 | 1.51718300  |
| H | -2.36118300 | -1.26232200 | 2.43996400  |
| H | -3.98195200 | -1.00889900 | 1.76419900  |
| H | -2.81064400 | -2.01191400 | 0.89854800  |
| C | -3.17608100 | 0.35364800  | -0.49709900 |
| O | -3.80593800 | -0.47994800 | -1.09723700 |
| O | -3.05378000 | 1.61672100  | -0.92905700 |
| H | -3.52615200 | 1.70289700  | -1.77018100 |
| O | 5.33203500  | -0.06667300 | 0.10001400  |
| O | 4.05331700  | 0.54921900  | -0.07506900 |

## IM12

|   |             |             |             |
|---|-------------|-------------|-------------|
| C | 2.71244000  | -0.50083300 | -0.79989300 |
| C | 1.38098300  | -0.33607700 | -1.19651800 |
| C | 0.42641500  | 0.14914000  | -0.30260300 |
| C | 0.80334700  | 0.47122900  | 1.00477200  |
| C | 2.12549200  | 0.31093000  | 1.42548800  |
| C | 3.01875500  | -0.16833200 | 0.49652600  |
| H | 3.45525000  | -0.87664300 | -1.49397400 |
| H | 1.08978800  | -0.58861800 | -2.21089200 |
| H | 0.06291200  | 0.84741800  | 1.70500000  |
| H | 2.41880900  | 0.55708400  | 2.43940400  |
| C | -1.01319300 | 0.35282000  | -0.75098700 |
| H | -1.11707300 | -0.06942300 | -1.75339000 |
| C | -1.41128200 | 1.82735700  | -0.75826700 |
| H | -0.75280800 | 2.37945400  | -1.42999700 |
| H | -2.44129400 | 1.94878200  | -1.09694600 |

|   |             |             |             |
|---|-------------|-------------|-------------|
| H | -1.32606900 | 2.25521900  | 0.24176800  |
| C | -1.92101500 | -0.45332000 | 0.15658300  |
| O | -2.61749300 | -0.00024100 | 1.02852100  |
| O | -1.84606300 | -1.76634300 | -0.10084000 |
| H | -2.41271200 | -2.23809400 | 0.52697500  |

### IM13

|   |             |             |             |
|---|-------------|-------------|-------------|
| C | 0.47406100  | 1.24626200  | -0.22380700 |
| C | -0.83686900 | 1.37093300  | 0.22700300  |
| C | -1.69470100 | 0.27329700  | 0.22670200  |
| C | -1.21722500 | -0.95163400 | -0.24416200 |
| C | 0.09053500  | -1.07241400 | -0.69793900 |
| C | 0.95805900  | 0.02245400  | -0.68782000 |
| H | 1.12760100  | 2.11265500  | -0.21880300 |
| H | -1.19549600 | 2.33210600  | 0.58000600  |
| H | -1.87309700 | -1.81676800 | -0.26328300 |
| H | 0.44353900  | -2.03059900 | -1.06612400 |
| C | 2.38726000  | -0.11631500 | -1.14800400 |
| H | 2.46786300  | -0.91951700 | -1.88519800 |
| H | 2.71839000  | 0.80572500  | -1.63146100 |
| C | 3.38909900  | -0.44510200 | -0.03063400 |
| C | 4.80567800  | -0.52261500 | -0.57474100 |
| H | 5.06277200  | 0.39058000  | -1.11243100 |
| H | 5.51787500  | -0.67427800 | 0.23845200  |
| H | 4.87814000  | -1.36708200 | -1.26225900 |
| C | 3.01587800  | -1.66810300 | 0.78563900  |
| H | 2.04164500  | -1.54070000 | 1.25956900  |
| H | 2.97354700  | -2.54107000 | 0.13146600  |
| H | 3.76648600  | -1.84827900 | 1.55716900  |
| C | -3.11979900 | 0.39592800  | 0.74300400  |
| H | -3.31501600 | 1.45089200  | 0.95010400  |
| C | -3.35002500 | -0.43915700 | 2.00104800  |

|   |             |             |             |
|---|-------------|-------------|-------------|
| H | -2.66624100 | -0.11201400 | 2.78524800  |
| H | -4.37476200 | -0.32785800 | 2.35878900  |
| H | -3.16958300 | -1.49608100 | 1.79965900  |
| C | -4.06796000 | -0.01536400 | -0.36525800 |
| O | -4.66514800 | -1.06000100 | -0.42220000 |
| O | -4.15394300 | 0.91953800  | -1.32193900 |
| H | -4.73562600 | 0.59212200  | -2.02360400 |
| O | 3.64152100  | 1.80856400  | 0.48881500  |
| O | 3.34357200  | 0.64704100  | 0.97238700  |

#### IM14

|   |             |             |             |
|---|-------------|-------------|-------------|
| C | -0.58050900 | -0.13018500 | -0.88275800 |
| C | 0.75902500  | -0.10443400 | -1.23910300 |
| C | 1.76476000  | -0.34845000 | -0.30273800 |
| C | 1.39377000  | -0.62026700 | 1.02248000  |
| C | 0.06555100  | -0.64430400 | 1.39363400  |
| C | -0.97250700 | -0.40188500 | 0.45398100  |
| H | -1.33192700 | 0.05598500  | -1.63904900 |
| H | 1.02944100  | 0.10809100  | -2.26821700 |
| H | 2.16044200  | -0.80879100 | 1.76818000  |
| H | -0.20134600 | -0.85289400 | 2.42413000  |
| C | -2.31887500 | -0.43453700 | 0.90228200  |
| H | -2.48475900 | -0.67243900 | 1.94759900  |
| H | -2.02221700 | 2.02093900  | -0.22895900 |
| C | -3.55233100 | -0.20723500 | 0.07291600  |
| C | -4.74590800 | 0.11835200  | 0.96395200  |
| H | -4.54937600 | 1.01845300  | 1.54775600  |
| H | -5.63338100 | 0.27648900  | 0.34858300  |
| H | -4.93614100 | -0.70890100 | 1.65055800  |
| C | -3.85087400 | -1.40582400 | -0.83081400 |
| H | -2.99253100 | -1.64613300 | -1.45952600 |
| H | -4.08430600 | -2.27286100 | -0.21109400 |

|   |             |             |             |
|---|-------------|-------------|-------------|
| H | -4.71291800 | -1.18544700 | -1.46451100 |
| C | 3.22757200  | -0.34750100 | -0.70790200 |
| H | 3.29217700  | 0.00622000  | -1.73980100 |
| C | 3.85923300  | -1.73369100 | -0.58578500 |
| H | 3.32003200  | -2.43665800 | -1.22186400 |
| H | 4.90587400  | -1.71061300 | -0.89358800 |
| H | 3.81253400  | -2.08917000 | 0.44466000  |
| C | 3.96396400  | 0.66375400  | 0.14866600  |
| O | 4.70091600  | 0.39879600  | 1.06379800  |
| O | 3.67736700  | 1.92351700  | -0.20807500 |
| H | 4.14033600  | 2.52796000  | 0.39041800  |
| O | -2.99109800 | 2.05623500  | -0.20591200 |
| O | -3.36083100 | 0.86482700  | -0.88082800 |

#### IM15

|   |             |             |             |
|---|-------------|-------------|-------------|
| C | -0.44928500 | -1.26733900 | -0.52649600 |
| C | 0.86160800  | -1.44026200 | -0.08966500 |
| C | 1.67654800  | -0.33798400 | 0.15229600  |
| C | 1.15954700  | 0.94007800  | -0.07172600 |
| C | -0.14759800 | 1.10781900  | -0.51087800 |
| C | -0.98006600 | 0.00634700  | -0.73072500 |
| H | -1.05535900 | -2.14226500 | -0.74243700 |
| H | 1.25314600  | -2.44113500 | 0.05798500  |
| H | 1.78638000  | 1.81159400  | 0.09200700  |
| H | -0.52576000 | 2.10876500  | -0.69113800 |
| C | -2.40978300 | 0.17989800  | -1.17402800 |
| H | -2.48775600 | 1.00209100  | -1.89139500 |
| H | -2.74771800 | -0.72575200 | -1.68318500 |
| C | -3.40397000 | 0.48388600  | -0.03507300 |
| C | -4.80148200 | 0.48573200  | -0.55873500 |
| H | -2.77244900 | -2.24747900 | 0.65153800  |
| H | -5.61688900 | 0.70843800  | 0.11799600  |

|   |             |             |             |
|---|-------------|-------------|-------------|
| H | -5.02059300 | 0.21625500  | -1.58314200 |
| C | -3.09755000 | 1.78940200  | 0.69729500  |
| H | -2.12126100 | 1.74101500  | 1.18238800  |
| H | -3.10191300 | 2.61790300  | -0.01303200 |
| H | -3.86051700 | 1.97379200  | 1.45531400  |
| C | 3.09763100  | -0.51454600 | 0.66419000  |
| H | 3.32520500  | -1.58316300 | 0.66655600  |
| C | 3.27894800  | 0.06669200  | 2.06526000  |
| H | 2.59249000  | -0.42522700 | 2.75552200  |
| H | 4.30039700  | -0.08249400 | 2.41871600  |
| H | 3.06783500  | 1.13704800  | 2.06875100  |
| C | 4.04712900  | 0.13468000  | -0.32242100 |
| O | 4.59590200  | 1.19612500  | -0.16883900 |
| O | 4.19420400  | -0.60135500 | -1.43290000 |
| H | 4.77423200  | -0.12568500 | -2.04543100 |
| O | -3.61094800 | -1.77878100 | 0.54449700  |
| O | -3.27660000 | -0.48475400 | 1.03564400  |

P1

|   |             |             |             |
|---|-------------|-------------|-------------|
| C | 0.56973200  | 0.25831800  | 1.19819700  |
| C | -0.78691200 | 0.06059000  | 1.43041400  |
| C | -1.64531500 | -0.27439300 | 0.38312200  |
| C | -1.12177700 | -0.39475200 | -0.90461400 |
| C | 0.23367900  | -0.18579500 | -1.13728500 |
| C | 1.09200600  | 0.13444100  | -0.08838600 |
| H | 1.22710700  | 0.51961400  | 2.02060000  |
| H | -1.18307400 | 0.16491700  | 2.43482400  |
| H | -1.77663600 | -0.64418800 | -1.73387400 |
| H | 0.62740600  | -0.27534900 | -2.14460800 |
| C | 2.57453600  | 0.30075900  | -0.32738500 |
| H | 2.76803700  | 0.38650200  | -1.40497400 |
| C | 3.41321500  | -0.85177600 | 0.24373500  |

|   |             |             |             |
|---|-------------|-------------|-------------|
| H | 3.26637500  | -0.84805800 | 1.33041000  |
| C | 4.89750800  | -0.64856800 | -0.06424800 |
| H | 5.27267300  | 0.28729500  | 0.35002400  |
| H | 5.48419400  | -1.47001100 | 0.35238300  |
| H | 5.05926300  | -0.63526900 | -1.14678700 |
| C | 2.92704100  | -2.19044200 | -0.31378800 |
| H | 1.89726500  | -2.40469000 | -0.02343700 |
| H | 2.98121700  | -2.19325800 | -1.40726100 |
| H | 3.56217800  | -2.99783200 | 0.05571700  |
| C | -3.12365900 | -0.52493300 | 0.63874700  |
| H | -3.33388600 | -0.27251200 | 1.68073900  |
| C | -3.51848200 | -1.97368700 | 0.35738200  |
| H | -2.93606200 | -2.64009500 | 0.99471300  |
| H | -4.57916600 | -2.13268400 | 0.55773600  |
| H | -3.32394900 | -2.23040800 | -0.68489400 |
| C | -3.92691700 | 0.43489900  | -0.21574200 |
| O | -4.51547300 | 0.14573400  | -1.22634700 |
| O | -3.88931100 | 1.68504500  | 0.26625700  |
| H | -4.38065500 | 2.26359600  | -0.33536000 |
| O | 3.06678300  | 1.47630000  | 0.31763900  |
| O | 2.43167000  | 2.60772700  | -0.26122700 |
| H | 3.11043300  | 2.93601300  | -0.86742000 |

P2

|   |             |             |             |
|---|-------------|-------------|-------------|
| C | -0.79368700 | 0.82474700  | 0.72407100  |
| C | 0.55856900  | 1.14968400  | 0.75895600  |
| C | 1.48033700  | 0.43070300  | 0.00221200  |
| C | 1.02878900  | -0.63140500 | -0.78721100 |
| C | -0.31607000 | -0.96310900 | -0.81468700 |
| C | -1.24494100 | -0.23666300 | -0.06246200 |
| H | -1.48290400 | 1.40778900  | 1.32235700  |
| H | 0.89644400  | 1.97273700  | 1.37870000  |

|   |             |             |             |
|---|-------------|-------------|-------------|
| H | 1.73591000  | -1.20244700 | -1.38084700 |
| H | -0.66557100 | -1.78840500 | -1.42288300 |
| C | -2.68959700 | -0.64492000 | -0.13237000 |
| C | -3.74750900 | 0.27841400  | 0.44803400  |
| H | -3.40909700 | 0.60707200  | 1.43493000  |
| C | -5.08636600 | -0.43504600 | 0.59335900  |
| H | -5.00065200 | -1.31826800 | 1.22862200  |
| H | -5.81798900 | 0.24261500  | 1.03745400  |
| H | -5.45875200 | -0.75414100 | -0.38191000 |
| C | -3.87678200 | 1.51270400  | -0.46234300 |
| H | -2.93597700 | 2.05601900  | -0.56132700 |
| H | -4.20333100 | 1.20795300  | -1.46013500 |
| H | -4.62523500 | 2.19335000  | -0.05266200 |
| C | 2.95097900  | 0.81194800  | 0.00214400  |
| H | 3.10572400  | 1.56528500  | 0.77814100  |
| C | 3.39599700  | 1.35287500  | -1.35579800 |
| H | 2.80264200  | 2.23146200  | -1.61189400 |
| H | 4.44980600  | 1.63423900  | -1.33168500 |
| H | 3.25907400  | 0.60036100  | -2.13374400 |
| C | 3.76692900  | -0.40291500 | 0.39999400  |
| O | 4.43221600  | -1.07178300 | -0.34823200 |
| O | 3.64427500  | -0.67835800 | 1.70521100  |
| H | 4.14704600  | -1.48254400 | 1.90186600  |
| O | -2.99611800 | -1.68175700 | -0.68552600 |

P3

|   |             |             |             |
|---|-------------|-------------|-------------|
| C | -1.85922400 | 0.95705600  | 0.49323800  |
| C | -0.50845900 | 1.26942500  | 0.48651200  |
| C | 0.41330600  | 0.41371200  | -0.12357400 |
| C | -0.03483700 | -0.76476400 | -0.72392900 |
| C | -1.38643700 | -1.08243900 | -0.71543700 |
| C | -2.30216900 | -0.22229200 | -0.10879600 |



|   |             |             |             |
|---|-------------|-------------|-------------|
| H | -2.58048700 | 1.61715500  | 0.96101600  |
| H | -0.16050100 | 2.18385200  | 0.95395700  |
| H | 0.67578000  | -1.43610400 | -1.19510800 |
| H | -1.73438700 | -2.00006900 | -1.17883300 |
| C | -3.73713000 | -0.57859300 | -0.11153800 |
| H | -3.98290300 | -1.53057200 | -0.61588000 |
| C | 1.88906600  | 0.77397300  | -0.16276100 |
| H | 2.03869600  | 1.66014500  | 0.45834900  |
| C | 2.37081400  | 1.04041500  | -1.58824000 |
| H | 1.79422900  | 1.85805300  | -2.02236800 |
| H | 3.42703300  | 1.31354800  | -1.59202100 |
| H | 2.24281200  | 0.15362000  | -2.21052300 |
| C | 2.67767800  | -0.35092800 | 0.47989400  |
| O | 3.33689800  | -1.16594300 | -0.11189900 |
| O | 2.53598000  | -0.35853600 | 1.81170900  |
| H | 3.02332500  | -1.11411100 | 2.17197700  |
| O | -4.60778400 | 0.09461500  | 0.38984200  |

P4

|   |             |             |             |
|---|-------------|-------------|-------------|
| C | -1.31990600 | -1.07548700 | -0.18178400 |
| C | 0.03644400  | -1.35586800 | -0.07943200 |
| C | 0.95142700  | -0.35800000 | 0.25781500  |
| C | 0.47607600  | 0.93442900  | 0.48040600  |
| C | -0.88046000 | 1.21566500  | 0.37485300  |
| C | -1.80661600 | 0.21640900  | 0.05226700  |
| H | -1.99992800 | -1.87253400 | -0.45870500 |
| H | 0.39080200  | -2.36360200 | -0.26935600 |
| H | 1.16967900  | 1.73072500  | 0.73267000  |
| H | -1.23254600 | 2.22726100  | 0.54834700  |
| C | -3.23661800 | 0.56669900  | -0.03164100 |
| H | -3.45239000 | 1.63363700  | -0.01114800 |
| C | -4.25985100 | -0.28738000 | -0.10747700 |

|   |             |             |             |
|---|-------------|-------------|-------------|
| H | -4.06968200 | -1.35832000 | -0.10568100 |
| C | -5.69686900 | 0.12510300  | -0.18959900 |
| H | -6.26923500 | -0.29674200 | 0.64129600  |
| H | -5.80028000 | 1.21101700  | -0.16812800 |
| H | -6.15406700 | -0.24973300 | -1.10983300 |
| C | 2.43325900  | -0.67032500 | 0.39270200  |
| H | 2.58917700  | -1.70635200 | 0.08270500  |
| C | 2.93939800  | -0.46430400 | 1.81929700  |
| H | 2.38303400  | -1.11013900 | 2.49972400  |
| H | 4.00109500  | -0.70531800 | 1.89318100  |
| H | 2.80049300  | 0.57180700  | 2.13093500  |
| C | 3.19464600  | 0.20066200  | -0.58612200 |
| O | 3.82363200  | 1.18764900  | -0.29994400 |
| O | 3.06698500  | -0.23456000 | -1.84740700 |
| H | 3.53332600  | 0.37798200  | -2.43491600 |

P5

|   |             |             |             |
|---|-------------|-------------|-------------|
| C | 0.74053100  | -0.88910200 | 1.02660700  |
| C | -0.63530400 | -0.88687500 | 1.22955400  |
| C | -1.50513200 | -0.53801800 | 0.19645100  |
| C | -0.97074500 | -0.19273400 | -1.04551100 |
| C | 0.40566900  | -0.19506400 | -1.24674900 |
| C | 1.27563800  | -0.53884900 | -0.21322800 |
| H | 1.40673000  | -1.16790300 | 1.83596300  |
| H | -1.03802000 | -1.15898000 | 2.19942400  |
| H | -1.63207900 | 0.07964500  | -1.86238500 |
| H | 0.80807600  | 0.07696700  | -2.21733400 |
| C | 2.77608200  | -0.49893100 | -0.41278100 |
| H | 2.98367900  | -0.41008500 | -1.48859200 |
| C | 3.42838000  | 0.69345600  | 0.29794100  |
| H | 3.23932000  | 0.56401200  | 1.37089200  |
| C | 2.80569100  | 2.01224600  | -0.16031700 |

|   |             |             |             |
|---|-------------|-------------|-------------|
| H | 1.74559300  | 2.07399700  | 0.09251700  |
| H | 3.31818200  | 2.85363200  | 0.31057200  |
| H | 2.90325200  | 2.12557400  | -1.24524600 |
| C | 4.93783700  | 0.69952800  | 0.05613400  |
| H | 5.40097900  | -0.22571400 | 0.39865300  |
| H | 5.14830000  | 0.81486800  | -1.01227400 |
| H | 5.40356200  | 1.53625200  | 0.58171100  |
| C | -3.01138300 | -0.55883300 | 0.40721200  |
| H | -3.20137700 | -0.74972900 | 1.46605500  |
| C | -3.69947400 | -1.61907400 | -0.45088900 |
| H | -3.29845800 | -2.60306600 | -0.20505900 |
| H | -4.77596900 | -1.62329400 | -0.27312200 |
| H | -3.52773900 | -1.42789900 | -1.51108700 |
| C | -3.55510300 | 0.82350500  | 0.10664300  |
| O | -4.15270000 | 1.13780600  | -0.89105300 |
| O | -3.26744800 | 1.69693800  | 1.08201400  |
| H | -3.59830200 | 2.56964000  | 0.82317500  |
| O | 3.39249300  | -1.67905800 | 0.09781000  |
| H | 2.97938200  | -2.44093100 | -0.32044400 |

P6

|   |             |             |             |
|---|-------------|-------------|-------------|
| C | -2.17741700 | -0.80869600 | 0.80181500  |
| C | -0.82003000 | -0.81281600 | 1.11100100  |
| C | 0.07374100  | 0.01399400  | 0.43632100  |
| C | -0.42128600 | 0.84992200  | -0.56860300 |
| C | -1.77051400 | 0.86177300  | -0.89072900 |
| H | -2.86229200 | -1.45593300 | 1.33938200  |
| H | -0.45810300 | -1.47179100 | 1.89289900  |
| H | 0.25688600  | 1.49937500  | -1.11355700 |
| H | -2.15412400 | 1.50801100  | -1.67103500 |
| C | 1.55190000  | 0.02683500  | 0.79437700  |
| H | 1.72579700  | -0.75994000 | 1.53205400  |

|   |             |             |             |
|---|-------------|-------------|-------------|
| C | 2.00467500  | 1.37696900  | 1.34711400  |
| H | 1.42895900  | 1.61587200  | 2.24219600  |
| H | 3.06480000  | 1.35583000  | 1.60568000  |
| H | 1.84786600  | 2.16700700  | 0.61123600  |
| C | 2.34295700  | -0.34622700 | -0.44291600 |
| O | 2.92326700  | 0.42895500  | -1.16006100 |
| O | 2.30178200  | -1.66362300 | -0.68726600 |
| H | 2.77819800  | -1.84035800 | -1.51168600 |
| C | -2.65259100 | 0.03016500  | -0.20201900 |
| O | -3.96740300 | 0.08090300  | -0.55532800 |
| H | -4.47777400 | -0.53946300 | -0.02409500 |

P7

|   |             |             |             |
|---|-------------|-------------|-------------|
| C | 0.38258600  | 0.18002200  | -1.29719400 |
| C | -0.91102000 | 0.68728300  | -1.22039800 |
| C | -1.76634300 | 0.30052100  | -0.19014400 |
| C | -1.30339800 | -0.61347700 | 0.75771000  |
| C | -0.01280600 | -1.12327500 | 0.67447500  |
| C | 0.85234000  | -0.72980600 | -0.34895600 |
| H | 1.03777000  | 0.49522400  | -2.10170400 |
| H | -1.25922300 | 1.39043900  | -1.96987000 |
| H | -1.95648400 | -0.93550300 | 1.56330200  |
| H | 0.32946700  | -1.83805700 | 1.41619000  |
| C | 2.26081700  | -1.26537100 | -0.41174100 |
| H | 2.31636100  | -2.21566500 | 0.12558700  |
| H | 2.54289200  | -1.46126000 | -1.45042100 |
| C | 3.33545400  | -0.34349000 | 0.19429100  |
| C | 4.68661700  | -1.04724300 | 0.18457900  |
| H | 4.91873800  | -1.41066100 | -0.81901800 |
| H | 5.47187100  | -0.36101400 | 0.50380000  |
| H | 4.67045800  | -1.89711100 | 0.87004800  |
| C | 2.96621500  | 0.14313900  | 1.58996500  |

|   |             |             |             |
|---|-------------|-------------|-------------|
| H | 2.06937400  | 0.76559500  | 1.55950200  |
| H | 2.76686700  | -0.71367100 | 2.23797400  |
| H | 3.78521300  | 0.71578400  | 2.02773100  |
| C | -3.16946100 | 0.87736300  | -0.08407400 |
| H | -3.36412600 | 1.46195300  | -0.98658200 |
| C | -3.33775100 | 1.75236900  | 1.15668300  |
| H | -2.62746500 | 2.57919100  | 1.11745500  |
| H | -4.34874400 | 2.15910700  | 1.21244900  |
| H | -3.14918000 | 1.17518800  | 2.06314400  |
| C | -4.16142200 | -0.26762400 | -0.08311100 |
| O | -4.75077800 | -0.68139300 | 0.88263600  |
| O | -4.29893900 | -0.81125000 | -1.30090900 |
| H | -4.90998000 | -1.55990000 | -1.23778800 |
| O | 4.31681800  | 1.72430700  | -0.31675400 |
| H | 3.76507100  | 2.39997300  | 0.10004900  |
| O | 3.35916800  | 0.76182900  | -0.73551700 |

P8

|   |             |             |             |
|---|-------------|-------------|-------------|
| C | -0.93803400 | -0.79915200 | 1.17495500  |
| C | 0.39508200  | -0.47726500 | 1.41538300  |
| C | 1.18374300  | 0.07307000  | 0.40786300  |
| C | 0.61418800  | 0.28907200  | -0.84924200 |
| C | -0.71488700 | -0.03743300 | -1.08788400 |
| C | -1.50879000 | -0.58381800 | -0.07789800 |
| H | -1.53853300 | -1.22604700 | 1.97161600  |
| H | 0.82403500  | -0.65695500 | 2.39538100  |
| H | 1.21474600  | 0.71000700  | -1.64990500 |
| H | -1.14177500 | 0.13257900  | -2.07091000 |
| C | -2.95618800 | -0.89891300 | -0.32688500 |
| H | -3.11289300 | -1.24349900 | -1.35516000 |
| H | -3.30510900 | -1.71022900 | 0.31917100  |
| C | -3.89112400 | 0.28783200  | -0.12509900 |

|   |             |             |             |
|---|-------------|-------------|-------------|
| C | -5.36287000 | -0.03122700 | -0.17522300 |
| H | -5.63283100 | -0.56987700 | 0.73762300  |
| H | -5.94645600 | 0.88485600  | -0.24033400 |
| H | -5.58653300 | -0.68830000 | -1.01759000 |
| C | 2.63273900  | 0.45268600  | 0.67141500  |
| H | 2.89592900  | 0.10437600  | 1.67301000  |
| C | 2.86278700  | 1.95886700  | 0.56059100  |
| H | 2.22717600  | 2.47797000  | 1.27890800  |
| H | 3.90455600  | 2.20866800  | 0.76749800  |
| H | 2.61757100  | 2.31377900  | -0.44138600 |
| C | 3.51316700  | -0.30674700 | -0.30077600 |
| O | 4.05026200  | 0.16307100  | -1.27143600 |
| O | 3.61280400  | -1.60367900 | 0.02340900  |
| H | 4.15000500  | -2.04994200 | -0.64762000 |
| O | -3.48166200 | 1.40945500  | 0.06759100  |

P9

|   |             |             |             |
|---|-------------|-------------|-------------|
| C | 0.63029400  | -1.07772000 | -0.83627500 |
| C | -0.69069600 | -0.82203200 | -1.19219600 |
| C | -1.50676300 | -0.03751100 | -0.37897800 |
| C | -0.97575300 | 0.47857400  | 0.80432000  |
| C | 0.34276800  | 0.21650100  | 1.15924300  |
| C | 1.16871300  | -0.56006100 | 0.34259700  |
| H | 1.25506600  | -1.68491700 | -1.48144800 |
| H | -1.09117800 | -1.23732500 | -2.11111300 |
| H | -1.59693000 | 1.08416000  | 1.45750700  |
| H | 0.73820600  | 0.62164400  | 2.08538600  |
| C | 2.60600200  | -0.81585000 | 0.71722400  |
| H | 2.72666700  | -0.71316700 | 1.79893500  |
| H | 2.88144800  | -1.84050800 | 0.45060600  |
| C | 3.62156900  | 0.12061700  | 0.03930600  |
| C | 5.02452700  | -0.20663100 | 0.54685600  |

|   |             |             |             |
|---|-------------|-------------|-------------|
| H | 5.25367000  | -1.26013900 | 0.37227300  |
| H | 5.76665000  | 0.40224900  | 0.02330700  |
| H | 5.10862300  | -0.00049000 | 1.61625800  |
| C | 3.29300600  | 1.59168200  | 0.27993600  |
| H | 2.31818200  | 1.84297300  | -0.14147800 |
| H | 3.27957700  | 1.81492200  | 1.34976100  |
| H | 4.05017200  | 2.22603100  | -0.18976100 |
| C | -2.94239300 | 0.26844100  | -0.77791900 |
| H | -3.17625900 | -0.31740400 | -1.67004800 |
| C | -3.15999600 | 1.75542500  | -1.05229400 |
| H | -2.49699400 | 2.07797700  | -1.85599500 |
| H | -4.19220400 | 1.94946800  | -1.34807700 |
| H | -2.94122600 | 2.34707000  | -0.16226000 |
| C | -3.86194200 | -0.22318400 | 0.32141400  |
| O | -4.42178400 | 0.47382400  | 1.12919700  |
| O | -3.96967900 | -1.55965200 | 0.32339200  |
| H | -4.53159400 | -1.82333900 | 1.06681400  |
| O | 3.54253000  | -0.16950700 | -1.36200500 |
| H | 4.14356800  | 0.42397200  | -1.82473700 |

P10

|   |             |             |             |
|---|-------------|-------------|-------------|
| C | -1.03391300 | 0.62770900  | 0.80644500  |
| C | 0.30377400  | 1.01140500  | 0.81451600  |
| C | 1.23541400  | 0.36651500  | 0.00466800  |
| C | 0.80307200  | -0.68901700 | -0.80211700 |
| C | -0.52944600 | -1.07678100 | -0.80380400 |
| C | -1.47973000 | -0.41222400 | -0.01630600 |
| H | -1.73331700 | 1.12710600  | 1.46643100  |
| H | 0.62578600  | 1.81813700  | 1.46458400  |
| H | 1.51523100  | -1.21641400 | -1.42978800 |
| H | -0.84593400 | -1.90450500 | -1.42998600 |
| C | -2.88586900 | -0.86157400 | -0.04811500 |

|   |             |             |             |
|---|-------------|-------------|-------------|
| H | -3.01952100 | -1.93784500 | -0.13927500 |
| C | -3.98893400 | -0.10077500 | -0.01165200 |
| C | -5.35378900 | -0.73391500 | -0.02504800 |
| H | -5.29718900 | -1.82282500 | -0.01819900 |
| H | -5.93029000 | -0.40917200 | 0.84727200  |
| H | -5.91482200 | -0.41570500 | -0.90925100 |
| C | -3.99795000 | 1.40437600  | 0.01675100  |
| H | -3.05352800 | 1.83626800  | -0.31298900 |
| H | -4.79699800 | 1.77689200  | -0.62971200 |
| H | -4.20986800 | 1.77302400  | 1.02603100  |
| C | 2.68956700  | 0.80937400  | -0.01852600 |
| H | 2.83094700  | 1.54683800  | 0.77525000  |
| C | 3.08445500  | 1.40528500  | -1.36879100 |
| H | 2.45074800  | 2.26568100  | -1.58750200 |
| H | 4.12676300  | 1.72854100  | -1.36130700 |
| H | 2.95890800  | 0.66922700  | -2.16433300 |
| C | 3.56202900  | -0.38043900 | 0.32587500  |
| O | 4.21185000  | -1.02074600 | -0.46095100 |
| O | 3.51216500  | -0.67759400 | 1.63215500  |
| H | 4.04888800  | -1.46817000 | 1.78976100  |

P11

|   |             |             |             |
|---|-------------|-------------|-------------|
| C | -1.06355800 | -0.98218700 | 0.78901900  |
| C | 0.24547400  | -0.73840400 | 1.19017900  |
| C | 1.11413600  | -0.01358100 | 0.37461900  |
| C | 0.64701400  | 0.45328800  | -0.85442400 |
| C | -0.66087500 | 0.20092200  | -1.25619900 |
| C | -1.53430400 | -0.51766200 | -0.43992300 |
| H | -1.73058700 | -1.54168000 | 1.43798900  |
| H | 0.59567400  | -1.11325400 | 2.14628900  |
| H | 1.30856800  | 1.01630600  | -1.50620400 |
| H | -1.00830300 | 0.56945800  | -2.21606200 |



|   |             |             |             |
|---|-------------|-------------|-------------|
| C | -2.97282400 | -0.76162600 | -0.84444800 |
| H | -3.08649800 | -0.53071000 | -1.90878300 |
| H | -3.22241700 | -1.81614900 | -0.70414600 |
| C | -3.93408600 | 0.09385400  | -0.04703600 |
| C | -4.85717200 | -0.45027400 | 0.74525800  |
| H | -5.54348400 | 0.16635200  | 1.31613600  |
| H | -4.95311100 | -1.52662000 | 0.84330800  |
| C | -3.77222400 | 1.58063800  | -0.20302900 |
| H | -2.78456700 | 1.89882500  | 0.14413500  |
| H | -3.84294200 | 1.86395600  | -1.25807100 |
| H | -4.53163000 | 2.12549800  | 0.35828700  |
| C | 2.53575500  | 0.28628700  | 0.82361200  |
| H | 2.72427300  | -0.27193100 | 1.74404700  |
| C | 2.76280800  | 1.77855200  | 1.05755300  |
| H | 2.07020100  | 2.13738900  | 1.81993700  |
| H | 3.78398700  | 1.96839300  | 1.39201400  |
| H | 2.59171200  | 2.34207600  | 0.13922300  |
| C | 3.49381600  | -0.25379500 | -0.21870800 |
| O | 4.09715800  | 0.40860800  | -1.02394200 |
| O | 3.58223100  | -1.59070400 | -0.17170400 |
| H | 4.17025100  | -1.88721200 | -0.88174900 |

#### IMs1

|   |             |             |             |
|---|-------------|-------------|-------------|
| C | 0.87713500  | -0.92409600 | -1.05032000 |
| C | -0.43665100 | -0.59853000 | -1.27595000 |
| C | -1.27723700 | 0.04816100  | -0.39966700 |
| C | -0.71323500 | 0.38406700  | 0.83762600  |
| C | 0.61447600  | 0.07541200  | 1.12096200  |
| C | 1.43090100  | -0.57458000 | 0.19128500  |
| H | 1.47750300  | -1.43654400 | -1.79600300 |
| H | -1.32044700 | 0.88865700  | 1.58403400  |
| H | 1.02870500  | 0.34851000  | 2.08578100  |

|   |             |             |             |
|---|-------------|-------------|-------------|
| C | 2.88338400  | -0.85924900 | 0.47707800  |
| H | 3.06915200  | -0.76800600 | 1.55281800  |
| H | 3.11389200  | -1.89163400 | 0.19498500  |
| C | 3.84253900  | 0.08448800  | -0.27196600 |
| H | 3.64993600  | -0.02849100 | -1.34582500 |
| C | 5.28974000  | -0.31789000 | 0.00621200  |
| H | 5.47429700  | -1.35787600 | -0.27436800 |
| H | 5.98481600  | 0.31496100  | -0.55062900 |
| H | 5.51546000  | -0.20917000 | 1.07196600  |
| C | 3.60243800  | 1.54380700  | 0.11244200  |
| H | 2.58828800  | 1.86568800  | -0.13508500 |
| H | 3.74636500  | 1.68049000  | 1.18973000  |
| H | 4.30386200  | 2.20089500  | -0.40726700 |
| C | -2.71676800 | 0.39406000  | -0.74825200 |
| H | -2.92729400 | -0.02008800 | -1.73667700 |
| C | -2.96518800 | 1.90075800  | -0.73638700 |
| H | -2.30691300 | 2.38442700  | -1.45892900 |
| H | -4.00073600 | 2.12373700  | -0.99837400 |
| H | -2.76496700 | 2.31699200  | 0.25187500  |
| C | -3.62241500 | -0.31772900 | 0.23696400  |
| O | -4.16403100 | 0.19763200  | 1.18138100  |
| O | -3.73599500 | -1.62349600 | -0.04000300 |
| H | -4.28641500 | -2.03770700 | 0.64077400  |

#### IMs2

|   |             |             |             |
|---|-------------|-------------|-------------|
| C | -0.89245900 | -0.58954100 | 1.07657400  |
| C | 0.40124800  | -0.27746200 | 1.40860300  |
| C | 1.25102600  | 0.12835200  | 0.37019200  |
| C | 0.74241600  | 0.18707900  | -0.92849700 |
| C | -0.58207400 | -0.14775700 | -1.20065300 |
| C | -1.45459100 | -0.55406600 | -0.18200900 |
| H | 0.76532000  | -0.33781900 | 2.42913900  |

|   |             |             |             |
|---|-------------|-------------|-------------|
| H | 1.38919400  | 0.49723200  | -1.74327000 |
| H | -0.95215600 | -0.09199900 | -2.21991500 |
| C | -2.90259200 | -0.89240000 | -0.43036700 |
| H | -3.10114600 | -0.86281700 | -1.50707100 |
| H | -3.09564400 | -1.91601500 | -0.09347700 |
| C | -3.87309000 | 0.05907200  | 0.28908500  |
| H | -3.64028400 | 0.01845500  | 1.36068700  |
| C | -5.31238200 | -0.41021500 | 0.08572900  |
| H | -5.45388200 | -1.42876400 | 0.45566100  |
| H | -6.01430700 | 0.24356700  | 0.60884300  |
| H | -5.57022300 | -0.39756000 | -0.97828700 |
| C | -3.69621100 | 1.49800000  | -0.19268600 |
| H | -2.67868400 | 1.85749400  | -0.02168600 |
| H | -3.90289900 | 1.56534100  | -1.26627100 |
| H | -4.38555400 | 2.16879100  | 0.32562300  |
| C | 2.69325600  | 0.51706400  | 0.65767600  |
| H | 2.89935800  | 0.29824700  | 1.70811800  |
| C | 2.96341500  | 1.99171400  | 0.36436700  |
| H | 2.30828600  | 2.61169900  | 0.97762900  |
| H | 4.00045500  | 2.24657800  | 0.58908100  |
| H | 2.77463100  | 2.21711800  | -0.68619400 |
| C | 3.60008400  | -0.37713000 | -0.16410300 |
| O | 4.17418800  | -0.05129000 | -1.17160900 |
| O | 3.67574200  | -1.61504300 | 0.34371900  |
| H | 4.22981300  | -2.15514300 | -0.23894700 |

### IMs3

|   |             |             |             |
|---|-------------|-------------|-------------|
| C | -0.87550300 | -0.97989500 | 0.98118400  |
| C | 0.45443900  | -0.69116100 | 1.27947200  |
| C | 1.25611900  | 0.02160200  | 0.38788400  |
| C | 0.70255200  | 0.44210500  | -0.83104400 |
| C | -0.61118600 | 0.12476300  | -1.06650400 |

|   |             |             |             |
|---|-------------|-------------|-------------|
| C | -1.45501700 | -0.56882200 | -0.22650500 |
| H | -1.47745100 | -1.53751400 | 1.69320900  |
| H | 0.87544300  | -1.02758300 | 2.22078200  |
| H | 1.29878200  | 0.99244800  | -1.55306900 |
| C | -2.90576700 | -0.83198000 | -0.54226100 |
| H | -3.07228800 | -0.70944900 | -1.61759600 |
| H | -3.14556900 | -1.86978300 | -0.29015900 |
| C | -3.86489000 | 0.10200600  | 0.21767700  |
| H | -3.68456200 | -0.03726000 | 1.29057700  |
| C | -5.31175000 | -0.28276900 | -0.08648300 |
| H | -5.50732700 | -1.32762100 | 0.16728600  |
| H | -6.00836300 | 0.34215300  | 0.47730400  |
| H | -5.52423600 | -0.14710500 | -1.15185500 |
| C | -3.60932100 | 1.56742000  | -0.13166000 |
| H | -2.59732700 | 1.87735000  | 0.13857300  |
| H | -3.73510200 | 1.72728700  | -1.20807200 |
| H | -4.31466700 | 2.21816900  | 0.39076500  |
| C | 2.70077400  | 0.35622800  | 0.72696600  |
| H | 2.94173500  | -0.12576500 | 1.67727600  |
| C | 2.93919700  | 1.86197400  | 0.82101600  |
| H | 2.29052000  | 2.28706200  | 1.58778200  |
| H | 3.97776300  | 2.07369700  | 1.08034400  |
| H | 2.71903600  | 2.34775900  | -0.13059300 |
| C | 3.59183900  | -0.27190000 | -0.32575800 |
| O | 4.11558300  | 0.31647900  | -1.23722000 |
| O | 3.71459700  | -1.59506400 | -0.15307100 |
| H | 4.25325300  | -1.95259800 | -0.87412700 |

#### IMs4

|   |             |             |             |
|---|-------------|-------------|-------------|
| C | 0.80743300  | -1.07037400 | -0.78524300 |
| C | -0.51261500 | -0.80097600 | -1.13475100 |
| C | -1.28566600 | 0.08997500  | -0.38015300 |

|   |             |             |             |
|---|-------------|-------------|-------------|
| C | -0.64938400 | 0.64801400  | 0.70661200  |
| C | 0.64553300  | 0.41815200  | 1.09667000  |
| C | 1.40929000  | -0.47207700 | 0.32582500  |
| H | 1.38587700  | -1.76199100 | -1.38944500 |
| H | -0.95379900 | -1.28214400 | -2.00224100 |
| H | 1.07927700  | 0.90291900  | 1.96565100  |
| C | 2.85652000  | -0.74122500 | 0.65031800  |
| H | 3.06334900  | -0.44966700 | 1.68578800  |
| H | 3.04950000  | -1.81590200 | 0.57114600  |
| C | 3.83241800  | 0.00647200  | -0.27768200 |
| H | 3.60626500  | -0.29265000 | -1.30847600 |
| C | 5.26906300  | -0.40274800 | 0.04285500  |
| H | 5.40661900  | -1.48218200 | -0.05876700 |
| H | 5.97584400  | 0.09583800  | -0.62473500 |
| H | 5.52348200  | -0.12434800 | 1.07073300  |
| C | 3.66282800  | 1.52065000  | -0.16375400 |
| H | 2.65435500  | 1.83709600  | -0.43954200 |
| H | 3.85000300  | 1.84632800  | 0.86539500  |
| H | 4.37118700  | 2.03849900  | -0.81479800 |
| C | -2.73131000 | 0.40892400  | -0.72147400 |
| H | -2.94808100 | -0.01681700 | -1.70365800 |
| C | -3.01102900 | 1.90856600  | -0.70737000 |
| H | -2.37515600 | 2.40679800  | -1.44000300 |
| H | -4.05517600 | 2.11087500  | -0.95043800 |
| H | -2.79878800 | 2.32440900  | 0.27907900  |
| C | -3.60555000 | -0.31637600 | 0.28408600  |
| O | -4.12390600 | 0.18723100  | 1.24719800  |
| O | -3.71591100 | -1.62141300 | 0.00075300  |
| H | -4.24141100 | -2.04547800 | 0.69507000  |

IMs5

|   |            |            |            |
|---|------------|------------|------------|
| C | 0.64121800 | 0.50952200 | 1.13390300 |
|---|------------|------------|------------|

|   |             |             |             |
|---|-------------|-------------|-------------|
| C | -0.73642700 | 0.38840000  | 1.01155000  |
| C | -1.35724500 | 0.54484400  | -0.23365900 |
| C | -0.56346700 | 0.82674000  | -1.34470000 |
| C | 0.81620500  | 0.95060500  | -1.21624100 |
| C | 1.44053100  | 0.79233300  | 0.02225600  |
| H | 1.10544200  | 0.38624400  | 2.10725000  |
| H | -1.33376000 | 0.17294100  | 1.89212900  |
| H | -1.02784400 | 0.95223100  | -2.31710900 |
| H | 1.41847800  | 1.17020500  | -2.09171100 |
| C | 2.93810400  | 0.87661000  | 0.16491900  |
| H | 3.36571900  | 1.36288800  | -0.71856000 |
| H | 3.18523400  | 1.50026800  | 1.03001600  |
| C | 3.60650700  | -0.50000200 | 0.34244700  |
| H | 3.16977800  | -0.97051800 | 1.23163700  |
| C | 5.10627000  | -0.32282000 | 0.57457400  |
| H | 5.30179700  | 0.30798200  | 1.44525000  |
| H | 5.59373300  | -1.28735300 | 0.73488000  |
| H | 5.57209500  | 0.14863200  | -0.29674500 |
| C | 3.34782600  | -1.40495800 | -0.86127100 |
| H | 2.28084500  | -1.58793700 | -1.00751800 |
| H | 3.73942600  | -0.94249800 | -1.77374200 |
| H | 3.84374800  | -2.37002500 | -0.73312700 |
| C | -2.86294400 | 0.42295900  | -0.36436700 |
| H | -3.13095700 | 0.52991100  | -1.42152600 |
| C | -3.64824600 | 1.45478700  | 0.45034400  |
| H | -3.38410300 | 2.45648600  | 0.10974500  |
| H | -4.72051300 | 1.30796800  | 0.31906000  |
| H | -3.41181500 | 1.37600900  | 1.51279400  |
| C | -3.30519700 | -0.97791200 | -0.01049000 |
| O | -4.43326400 | -1.36981400 | 0.17869800  |
| O | -2.32999900 | -1.86519500 | 0.06651300  |

IMs6a

|   |             |             |             |
|---|-------------|-------------|-------------|
| C | 0.60074800  | -0.22979500 | -1.21570800 |
| C | -0.60687500 | 0.37929700  | -1.34695700 |
| C | -1.36435600 | 0.95500900  | -0.18407800 |
| C | -0.59586100 | 0.83124000  | 1.10008700  |
| C | 0.61659600  | 0.22736200  | 1.17763600  |
| C | 1.25281400  | -0.34849400 | 0.04101400  |
| H | 1.09639000  | -0.62829000 | -2.09592700 |
| H | -1.08458600 | 0.47045900  | -2.31731100 |
| H | -1.04816900 | 1.27589900  | 1.97939300  |
| H | 1.12687800  | 0.17922000  | 2.13539800  |
| C | 2.60678500  | -0.97648500 | 0.16957300  |
| H | 2.61426000  | -1.65394800 | 1.03094500  |
| H | 2.82310300  | -1.57781600 | -0.72016800 |
| C | 3.74178700  | 0.05419400  | 0.35304500  |
| H | 3.51993600  | 0.63797300  | 1.25432500  |
| C | 3.82008600  | 1.00973200  | -0.83676700 |
| H | 2.89477300  | 1.57768700  | -0.95999100 |
| H | 4.64033200  | 1.72011800  | -0.70905800 |
| H | 3.99861900  | 0.45011300  | -1.76127800 |
| C | 5.07131700  | -0.66964000 | 0.55835400  |
| H | 5.02864700  | -1.34298500 | 1.41796000  |
| H | 5.32012600  | -1.26465100 | -0.32618400 |
| H | 5.88270100  | 0.04332200  | 0.72270300  |
| C | -2.78279200 | 0.30487900  | -0.10024600 |
| H | -3.27479200 | 0.55956500  | -1.04164100 |
| C | -3.60766600 | 0.81028700  | 1.08241400  |
| H | -3.60562100 | 1.89976200  | 1.09667700  |
| H | -4.63941000 | 0.46574300  | 0.99472500  |
| H | -3.20508700 | 0.43829300  | 2.02486600  |
| C | -2.64354200 | -1.20110000 | -0.03871900 |
| O | -2.35607700 | -1.82689900 | 0.95020100  |
| O | -2.87519500 | -1.79050600 | -1.22029200 |

|   |             |             |             |
|---|-------------|-------------|-------------|
| H | -2.74791600 | -2.74558900 | -1.11663200 |
| O | -1.66497400 | 2.34296100  | -0.43885700 |
| H | -0.82446100 | 2.81176300  | -0.49511200 |

IMs6s

|   |             |             |             |
|---|-------------|-------------|-------------|
| C | -1.00232600 | -1.37180700 | 0.83196200  |
| C | 0.33801300  | -1.37689000 | 1.03873600  |
| C | 1.31932400  | -0.79785600 | 0.05985400  |
| C | 0.64711100  | -0.33873700 | -1.20157000 |
| C | -0.70258400 | -0.35498800 | -1.36232000 |
| C | -1.58052900 | -0.83448800 | -0.35414900 |
| H | -1.66181100 | -1.79851700 | 1.58247500  |
| H | 0.76469900  | -1.80265000 | 1.94173600  |
| H | 1.29814500  | 0.02701500  | -1.98728900 |
| H | -1.13177000 | 0.00490300  | -2.29283500 |
| C | -3.06846900 | -0.75177700 | -0.49923700 |
| H | -3.33176900 | -0.58612400 | -1.54970300 |
| H | -3.52164300 | -1.70145600 | -0.19243800 |
| C | -3.69176900 | 0.37932600  | 0.34768500  |
| H | -3.43467300 | 0.18852600  | 1.39674700  |
| C | -5.21261200 | 0.35480200  | 0.20789400  |
| H | -5.62351100 | -0.61222200 | 0.50846900  |
| H | -5.67396600 | 1.12888400  | 0.82580900  |
| H | -5.50153600 | 0.53764100  | -0.83216400 |
| C | -3.12956900 | 1.74361100  | -0.04869000 |
| H | -2.04928400 | 1.79633200  | 0.10774500  |
| H | -3.32729500 | 1.94270600  | -1.10759000 |
| H | -3.59724000 | 2.53916500  | 0.53646900  |
| C | 2.11025800  | 0.35164300  | 0.75949800  |
| H | 2.47696100  | -0.05671400 | 1.70390400  |
| C | 1.24349000  | 1.58398000  | 1.00848600  |
| H | 0.34464800  | 1.30143200  | 1.55997000  |



|   |            |             |             |
|---|------------|-------------|-------------|
| H | 1.78899700 | 2.32547200  | 1.59418400  |
| H | 0.94414100 | 2.03785700  | 0.06250600  |
| C | 3.31488800 | 0.71600300  | -0.08146100 |
| O | 3.27196600 | 1.32855700  | -1.11999300 |
| O | 4.46831000 | 0.30035500  | 0.45736300  |
| H | 5.19173100 | 0.56551400  | -0.13001900 |
| O | 2.33797300 | -1.77082900 | -0.24867600 |
| H | 1.90782000 | -2.51935600 | -0.67765800 |

#### IMs7a

|   |             |             |             |
|---|-------------|-------------|-------------|
| C | 0.88692800  | 0.72268200  | -1.13942600 |
| C | -0.53274900 | 1.11216400  | -0.86861200 |
| C | -1.24463800 | 0.17374300  | 0.06332400  |
| C | -0.60932400 | -0.91023000 | 0.59767900  |
| C | 0.73840300  | -1.19857200 | 0.29942400  |
| C | 1.48932700  | -0.35698300 | -0.57559300 |
| H | 1.44323400  | 1.37738200  | -1.80372500 |
| H | -1.09332400 | 1.16474900  | -1.81270300 |
| H | -1.14969600 | -1.57199300 | 1.26856300  |
| H | 1.21129700  | -2.06848400 | 0.73995300  |
| C | 2.94491800  | -0.67051400 | -0.81383600 |
| H | 3.04212900  | -1.71601100 | -1.12631100 |
| H | 3.32260300  | -0.05038100 | -1.63376400 |
| C | 3.82656600  | -0.44138100 | 0.42715800  |
| H | 3.44694300  | -1.07758800 | 1.23571100  |
| C | 3.76783600  | 1.01359000  | 0.89035900  |
| H | 2.75275300  | 1.30824100  | 1.16657300  |
| H | 4.41605700  | 1.17074800  | 1.75579000  |
| H | 4.10554500  | 1.67991400  | 0.08917000  |
| C | 5.26583500  | -0.85623400 | 0.12424300  |
| H | 5.31998900  | -1.90153100 | -0.19000100 |
| H | 5.67717300  | -0.23908200 | -0.68101900 |

|   |             |             |             |
|---|-------------|-------------|-------------|
| H | 5.90299900  | -0.73023100 | 1.00276100  |
| C | -2.69524600 | 0.49204700  | 0.37582400  |
| H | -2.96274600 | 1.39869800  | -0.17202800 |
| C | -2.95543800 | 0.69120200  | 1.86769900  |
| H | -2.34557100 | 1.51765900  | 2.23480000  |
| H | -4.00670300 | 0.92097000  | 2.04889500  |
| H | -2.69956300 | -0.20759500 | 2.42985200  |
| C | -3.53912600 | -0.63374300 | -0.18574400 |
| O | -4.06678000 | -1.50398100 | 0.45861400  |
| O | -3.60858000 | -0.58106700 | -1.52479000 |
| H | -4.11225900 | -1.34625400 | -1.83930800 |
| O | -0.60587500 | 2.46521800  | -0.37413800 |
| H | -0.08074000 | 2.50280800  | 0.43430300  |

#### IMs7s

|   |             |             |             |
|---|-------------|-------------|-------------|
| C | 0.86761200  | -1.10531900 | -0.30378600 |
| C | -0.54317500 | -0.86489200 | -0.73685500 |
| C | -1.12948600 | 0.41951400  | -0.21198400 |
| C | -0.37302500 | 1.28234000  | 0.52054100  |
| C | 0.97509600  | 0.99826000  | 0.84751600  |
| C | 1.58766300  | -0.21722100 | 0.43695900  |
| H | 1.31168400  | -2.04450500 | -0.62272400 |
| H | -0.58487600 | -0.83819100 | -1.83688800 |
| H | -0.80226900 | 2.21109800  | 0.87947100  |
| H | 1.54195900  | 1.70677500  | 1.43993900  |
| C | 3.02901900  | -0.49402000 | 0.79167500  |
| H | 3.30525600  | 0.08241000  | 1.68195300  |
| H | 3.14240500  | -1.55247800 | 1.04464800  |
| C | 4.01269300  | -0.15053100 | -0.34146600 |
| H | 3.73382000  | -0.75497700 | -1.21321300 |
| C | 5.43424200  | -0.52418200 | 0.07611000  |
| H | 5.50532500  | -1.58243300 | 0.33999900  |

|   |             |             |             |
|---|-------------|-------------|-------------|
| H | 6.14495200  | -0.32413000 | -0.72931100 |
| H | 5.73975100  | 0.06304800  | 0.94824300  |
| C | 3.93589100  | 1.32487200  | -0.73174700 |
| H | 2.94140000  | 1.59810000  | -1.09200200 |
| H | 4.16889500  | 1.95859900  | 0.13100100  |
| H | 4.65675600  | 1.55228700  | -1.52094200 |
| C | -2.57508700 | 0.64929400  | -0.56692500 |
| H | -2.72177100 | 0.36804600  | -1.61506300 |
| C | -3.06941100 | 2.08939200  | -0.36837700 |
| H | -2.44941400 | 2.77800000  | -0.94350000 |
| H | -4.10089900 | 2.18221400  | -0.71085200 |
| H | -3.03027800 | 2.37673600  | 0.68385200  |
| C | -3.47991500 | -0.25207500 | 0.25632300  |
| O | -3.33379600 | -0.50546100 | 1.42564800  |
| O | -4.53121600 | -0.68702500 | -0.45031700 |
| H | -5.10550400 | -1.20013300 | 0.13730800  |
| O | -1.38997400 | -1.98595600 | -0.41918100 |
| H | -1.39000800 | -2.08551800 | 0.54098300  |

#### IMs8a

|   |             |             |             |
|---|-------------|-------------|-------------|
| C | 0.79793800  | 1.38397900  | -0.28098400 |
| C | -0.65625600 | 1.41614200  | 0.07602100  |
| C | -1.41788300 | 0.29823500  | 0.18370500  |
| C | -0.84796900 | -0.97850500 | -0.09584800 |
| C | 0.50269800  | -1.08471600 | -0.48139100 |
| C | 1.32366100  | 0.00524600  | -0.58587800 |
| H | 0.97445500  | 2.02466600  | -1.15628000 |
| H | -1.07888500 | 2.39538300  | 0.27967600  |
| H | -1.45927700 | -1.87075800 | -0.01963900 |
| H | 0.90641900  | -2.06771500 | -0.70541300 |
| C | 2.75802700  | -0.11940200 | -1.01188000 |
| H | 2.87158000  | -1.03530200 | -1.60384200 |

|   |             |             |             |
|---|-------------|-------------|-------------|
| H | 3.01077900  | 0.72386600  | -1.66563000 |
| C | 3.79846600  | -0.16898000 | 0.13045000  |
| H | 3.74056800  | 0.77369400  | 0.68134900  |
| C | 5.19744400  | -0.29759700 | -0.47163300 |
| H | 5.41078400  | 0.52363800  | -1.16068600 |
| H | 5.96047200  | -0.29303200 | 0.31058400  |
| H | 5.28926700  | -1.23741200 | -1.02599900 |
| C | 3.52153700  | -1.32069400 | 1.09507400  |
| H | 2.55458100  | -1.21178200 | 1.59158700  |
| H | 3.51719700  | -2.27589000 | 0.55811800  |
| H | 4.29512700  | -1.37213000 | 1.86535400  |
| C | -2.87132800 | 0.37681100  | 0.62279100  |
| H | -3.15312000 | 1.43189600  | 0.66540500  |
| C | -3.09529800 | -0.28510200 | 1.98098600  |
| H | -2.47939400 | 0.21061000  | 2.73238600  |
| H | -4.14208500 | -0.21184400 | 2.27969200  |
| H | -2.82312800 | -1.34130100 | 1.94961100  |
| C | -3.73613500 | -0.26395300 | -0.44485000 |
| O | -4.29405700 | -1.32727000 | -0.34781100 |
| O | -3.79966100 | 0.48622400  | -1.55385900 |
| H | -4.33463100 | 0.01960900  | -2.21245100 |
| O | 1.57381600  | 2.03088900  | 0.74862700  |
| H | 1.44909800  | 1.52627100  | 1.56115500  |

IMs8s

|   |             |             |             |
|---|-------------|-------------|-------------|
| C | 0.92846800  | 0.79879600  | 0.77530700  |
| C | -0.52527500 | 0.65726800  | 1.10633200  |
| C | -1.38243900 | -0.09945900 | 0.37466400  |
| C | -0.91275900 | -0.79087300 | -0.77916700 |
| C | 0.43359600  | -0.66564900 | -1.18310200 |
| C | 1.33808500  | 0.08809200  | -0.48982400 |
| H | 1.52009200  | 0.39645200  | 1.61115200  |

|   |             |             |             |
|---|-------------|-------------|-------------|
| H | -0.87089800 | 1.19526500  | 1.98365200  |
| H | -1.59735700 | -1.39396700 | -1.36454500 |
| H | 0.75724200  | -1.17681300 | -2.08444700 |
| C | 2.76379600  | 0.24399400  | -0.93094500 |
| H | 2.92727200  | -0.35678600 | -1.83219800 |
| H | 2.94302500  | 1.29106000  | -1.20196100 |
| C | 3.80131800  | -0.15884100 | 0.13362400  |
| H | 3.67394100  | 0.50126700  | 0.99939800  |
| C | 5.21167300  | 0.04773600  | -0.41597800 |
| H | 5.36679600  | 1.08295200  | -0.72986700 |
| H | 5.96449100  | -0.19710200 | 0.33702200  |
| H | 5.38045100  | -0.59815900 | -1.28353700 |
| C | 3.59974500  | -1.60559800 | 0.58221900  |
| H | 2.61247900  | -1.76096900 | 1.02532800  |
| H | 3.69017000  | -2.28185500 | -0.27451500 |
| H | 4.35214200  | -1.89287400 | 1.32050300  |
| C | -2.84255600 | -0.23960900 | 0.77543300  |
| H | -3.03428600 | 0.45555900  | 1.59639200  |
| C | -3.18384600 | -1.66629400 | 1.20089000  |
| H | -2.55927900 | -1.95163200 | 2.04823700  |
| H | -4.23185600 | -1.74286300 | 1.49407700  |
| H | -3.00580700 | -2.36830900 | 0.38495500  |
| C | -3.70945100 | 0.20501400  | -0.38619200 |
| O | -4.36180600 | -0.52251800 | -1.09092900 |
| O | -3.65658800 | 1.53176000  | -0.57058700 |
| H | -4.20049200 | 1.75869900  | -1.33911000 |
| O | 1.31578700  | 2.18342200  | 0.74704200  |
| H | 0.81059100  | 2.61129200  | 0.04569000  |

IMs9a

|   |             |            |             |
|---|-------------|------------|-------------|
| C | 0.53288000  | 1.36719000 | -1.21861100 |
| C | -0.81631800 | 1.21001700 | -1.25913700 |

|   |             |             |             |
|---|-------------|-------------|-------------|
| C | -1.51879300 | 0.57383800  | -0.20461800 |
| C | -0.78218300 | 0.14149900  | 0.93328900  |
| C | 0.56681300  | 0.27499900  | 1.00927300  |
| C | 1.40338700  | 0.84795300  | -0.10509000 |
| H | 1.05538800  | 1.87273200  | -2.02457400 |
| H | -1.37711400 | 1.59121500  | -2.10668800 |
| H | -1.31834400 | -0.29845600 | 1.76933100  |
| H | 1.08758300  | -0.04468100 | 1.90238900  |
| C | 2.38047500  | -0.19871700 | -0.70356400 |
| H | 1.83441000  | -1.14404200 | -0.80150800 |
| H | 2.62202200  | 0.12921500  | -1.72054200 |
| C | 3.70868200  | -0.43915300 | 0.02820300  |
| H | 4.26599600  | 0.50197000  | 0.01788400  |
| C | 4.50888800  | -1.48107000 | -0.75845700 |
| H | 4.64055300  | -1.18040700 | -1.80089700 |
| H | 5.49833400  | -1.62437600 | -0.31778300 |
| H | 3.99291300  | -2.44663100 | -0.74804600 |
| C | 3.55660500  | -0.88400000 | 1.48266400  |
| H | 3.17189000  | -0.07944700 | 2.11057100  |
| H | 2.88135300  | -1.74270700 | 1.56075500  |
| H | 4.52703200  | -1.18402900 | 1.88656100  |
| C | -3.02127200 | 0.41336900  | -0.25047700 |
| H | -3.36636300 | 0.71609500  | -1.24200600 |
| C | -3.72750300 | 1.23862500  | 0.82720900  |
| H | -3.49256200 | 2.29457100  | 0.68919800  |
| H | -4.80898300 | 1.10716400  | 0.76615100  |
| H | -3.40102300 | 0.93511200  | 1.82264200  |
| C | -3.34600000 | -1.06210700 | -0.10399900 |
| O | -3.77343900 | -1.58795600 | 0.89170300  |
| O | -3.06622300 | -1.74729500 | -1.22168400 |
| H | -3.25108000 | -2.68503100 | -1.06473400 |
| O | 2.22985400  | 1.91744600  | 0.39522900  |
| H | 1.64248900  | 2.60951800  | 0.71919800  |

## IMs9s

|   |             |             |             |
|---|-------------|-------------|-------------|
| C | -0.90279600 | -0.97044400 | 1.23286600  |
| C | 0.30753200  | -0.38866000 | 1.44510600  |
| C | 1.11856100  | 0.05442300  | 0.36779000  |
| C | 0.65574700  | -0.13968300 | -0.96290400 |
| C | -0.55655300 | -0.69504900 | -1.21581200 |
| C | -1.47511800 | -1.19453600 | -0.13662100 |
| H | -1.50661000 | -1.31364200 | 2.06744700  |
| H | 0.67349600  | -0.26112400 | 2.45904700  |
| H | 1.28347300  | 0.17704600  | -1.79114200 |
| H | -0.90331500 | -0.83334300 | -2.23519100 |
| C | -2.90024200 | -0.61749900 | -0.25157900 |
| H | -3.19963700 | -0.67458600 | -1.30569300 |
| H | -3.54842400 | -1.30431300 | 0.30361300  |
| C | -3.13240700 | 0.80287200  | 0.27560000  |
| H | -2.92183300 | 0.80284500  | 1.35156300  |
| C | -4.60632100 | 1.16559100  | 0.08269600  |
| H | -5.26348600 | 0.42747700  | 0.54939500  |
| H | -4.82612400 | 2.14315600  | 0.51816100  |
| H | -4.85091300 | 1.20919400  | -0.98358300 |
| C | -2.23882800 | 1.85671100  | -0.38049300 |
| H | -1.18801700 | 1.72431400  | -0.11676400 |
| H | -2.32311500 | 1.80889300  | -1.47160600 |
| H | -2.54282900 | 2.85735300  | -0.06220800 |
| C | 2.43786900  | 0.74691400  | 0.62205500  |
| H | 2.66329700  | 0.67231500  | 1.68876200  |
| C | 2.40168300  | 2.21543600  | 0.19342600  |
| H | 1.62014500  | 2.73657600  | 0.74808000  |
| H | 3.35896000  | 2.70055200  | 0.39116100  |
| H | 2.18703500  | 2.30057900  | -0.87298700 |
| C | 3.53208400  | -0.00730000 | -0.11057900 |

|   |             |             |             |
|---|-------------|-------------|-------------|
| O | 4.07962200  | 0.35886600  | -1.11871300 |
| O | 3.81360600  | -1.17626900 | 0.48224600  |
| H | 4.48881400  | -1.63341000 | -0.04028000 |
| O | -1.67374000 | -2.61744300 | -0.34225200 |
| H | -0.80409700 | -3.03376200 | -0.33732000 |

IMs10a

|   |             |             |             |
|---|-------------|-------------|-------------|
| C | -0.79931700 | -1.30326600 | -0.71160200 |
| C | 0.55773100  | -1.53597700 | -0.40036000 |
| C | 1.39353800  | -0.46489200 | 0.01111500  |
| C | 0.88621100  | 0.79518600  | 0.09286000  |
| C | -0.54418400 | 1.12380000  | -0.20398600 |
| C | -1.36853700 | -0.06346300 | -0.63108600 |
| H | -1.41209000 | -2.14227500 | -1.02809100 |
| H | 0.96505900  | -2.53721000 | -0.47246300 |
| H | 1.50940700  | 1.62790200  | 0.40842900  |
| H | -0.58863000 | 1.88019200  | -1.00087800 |
| C | -2.81093400 | 0.17262000  | -0.97577300 |
| H | -2.90271200 | 1.13807000  | -1.48721500 |
| H | -3.13649100 | -0.60143100 | -1.68075500 |
| C | -3.79749800 | 0.16429300  | 0.21443700  |
| H | -3.52137700 | 0.98016200  | 0.88768600  |
| C | -3.74005500 | -1.15255700 | 0.98647000  |
| H | -2.75399600 | -1.32486600 | 1.42382200  |
| H | -4.47563600 | -1.15600700 | 1.79469300  |
| H | -3.96542200 | -1.99455800 | 0.32245500  |
| C | -5.21184100 | 0.41989500  | -0.30549400 |
| H | -5.27000900 | 1.36463400  | -0.85206300 |
| H | -5.52011400 | -0.38298000 | -0.98324800 |
| H | -5.92893800 | 0.45828200  | 0.51807600  |
| C | 2.83853800  | -0.75256800 | 0.39959800  |
| H | 3.08884300  | -1.75632800 | 0.04729300  |



|   |             |             |             |
|---|-------------|-------------|-------------|
| C | 3.04746800  | -0.65836000 | 1.90983000  |
| H | 2.38146700  | -1.35997600 | 2.41424700  |
| H | 4.07803400  | -0.89766000 | 2.17736900  |
| H | 2.82262800  | 0.34954100  | 2.26191700  |
| C | 3.74577100  | 0.20695600  | -0.34049400 |
| O | 4.29506000  | 1.16400200  | 0.14296300  |
| O | 3.86038700  | -0.11227200 | -1.63769500 |
| H | 4.41565600  | 0.55224200  | -2.07107900 |
| O | -1.13762800 | 1.80901800  | 0.91687500  |
| H | -1.10957400 | 1.20628500  | 1.66956800  |

#### IMs10s

|   |             |             |             |
|---|-------------|-------------|-------------|
| C | 0.85105100  | -0.33444800 | 1.48142700  |
| C | -0.50276600 | -0.73295400 | 1.44652500  |
| C | -1.30821700 | -0.44148000 | 0.31341700  |
| C | -0.78290600 | 0.25331400  | -0.73296300 |
| C | 0.61344400  | 0.79193700  | -0.73116700 |
| C | 1.43102600  | 0.35688100  | 0.45589400  |
| H | 1.45084000  | -0.59440100 | 2.34904000  |
| H | -0.93013000 | -1.27226400 | 2.28312600  |
| H | -1.38930700 | 0.48979400  | -1.60309500 |
| H | 1.13021000  | 0.49679600  | -1.65322900 |
| C | 2.89289800  | 0.70295200  | 0.45549500  |
| H | 3.08219300  | 1.49349000  | -0.27869300 |
| H | 3.17962900  | 1.09657500  | 1.43603800  |
| C | 3.79822000  | -0.50474300 | 0.13245200  |
| H | 3.62853400  | -1.25888500 | 0.90994700  |
| C | 5.26484500  | -0.07986900 | 0.17612300  |
| H | 5.52419000  | 0.35292700  | 1.14547000  |
| H | 5.92373900  | -0.93250500 | -0.00477700 |
| H | 5.46608500  | 0.67081500  | -0.59474400 |
| C | 3.45280400  | -1.12387700 | -1.22139400 |

|   |             |             |             |
|---|-------------|-------------|-------------|
| H | 2.42726800  | -1.50230200 | -1.24280800 |
| H | 3.56078300  | -0.38204400 | -2.02001700 |
| H | 4.12169800  | -1.95811700 | -1.44582500 |
| C | -2.74902400 | -0.93728500 | 0.27086000  |
| H | -3.00204100 | -1.32396800 | 1.26102800  |
| C | -2.95076600 | -2.02315600 | -0.78374800 |
| H | -2.28311300 | -2.86061700 | -0.57683300 |
| H | -3.98023400 | -2.38470200 | -0.77853300 |
| H | -2.72547500 | -1.63589500 | -1.77835100 |
| C | -3.65821700 | 0.24721500  | 0.02044700  |
| O | -4.21286500 | 0.49663300  | -1.01955800 |
| O | -3.76578300 | 1.03205100  | 1.10248900  |
| H | -4.32213300 | 1.79249600  | 0.87868700  |
| O | 0.59172800  | 2.23422200  | -0.82484400 |
| H | 0.11826600  | 2.56264100  | -0.05133200 |

#### IMs11a

|   |             |             |             |
|---|-------------|-------------|-------------|
| C | -0.84652500 | -1.09747300 | 0.91888600  |
| C | 0.50042800  | -0.81609000 | 1.23918200  |
| C | 1.25876100  | 0.03112600  | 0.48374100  |
| C | 0.63787800  | 0.79111200  | -0.65979500 |
| C | -0.71663900 | 0.27805700  | -1.04236100 |
| C | -1.44249700 | -0.56690700 | -0.25899300 |
| H | -1.42379400 | -1.75725900 | 1.55606900  |
| H | 0.95027300  | -1.31324700 | 2.09311500  |
| H | 1.31226500  | 0.77787200  | -1.52361300 |
| H | -1.14939300 | 0.69475700  | -1.94772300 |
| C | -2.87262500 | -0.90995600 | -0.60148000 |
| H | -2.95346700 | -1.09744500 | -1.67651500 |
| H | -3.16133200 | -1.83502500 | -0.08951100 |
| C | -3.86888400 | 0.19870200  | -0.21749300 |
| H | -3.58300000 | 1.10202400  | -0.77010100 |

|   |             |             |             |
|---|-------------|-------------|-------------|
| C | -3.81961200 | 0.51106300  | 1.27753100  |
| H | -2.83217200 | 0.86266400  | 1.58660900  |
| H | -4.54900000 | 1.28332000  | 1.53408600  |
| H | -4.05773900 | -0.38479400 | 1.86137100  |
| C | -5.28148600 | -0.20348400 | -0.63865700 |
| H | -5.33040200 | -0.41845500 | -1.70911300 |
| H | -5.59667400 | -1.10190600 | -0.09814200 |
| H | -5.99795500 | 0.59094100  | -0.41636600 |
| C | 2.74407900  | 0.18354200  | 0.74310700  |
| H | 2.96440200  | -0.29882100 | 1.69771600  |
| C | 3.26296500  | 1.62177800  | 0.74624600  |
| H | 2.73392700  | 2.20447400  | 1.50033100  |
| H | 4.33017400  | 1.62933100  | 0.97645800  |
| H | 3.11086600  | 2.09580600  | -0.22251700 |
| C | 3.44428500  | -0.62756900 | -0.33559300 |
| O | 3.81215100  | -0.19511900 | -1.39887300 |
| O | 3.57507000  | -1.91709000 | 0.00385600  |
| H | 3.97181200  | -2.39280600 | -0.74097000 |
| O | 0.53207800  | 2.20139700  | -0.34516400 |
| H | -0.09394600 | 2.28166900  | 0.38433500  |

#### IMs11s

|   |             |             |             |
|---|-------------|-------------|-------------|
| C | 1.03101700  | -0.67616000 | -1.17720400 |
| C | -0.31187400 | -0.35452400 | -1.47049500 |
| C | -1.14340600 | 0.18838800  | -0.53575700 |
| C | -0.64677800 | 0.50357100  | 0.84954300  |
| C | 0.76801900  | 0.07897200  | 1.08952000  |
| C | 1.56104200  | -0.46844700 | 0.13100400  |
| H | 1.65572200  | -1.12110200 | -1.94284900 |
| H | -0.69706800 | -0.56571800 | -2.46333500 |
| H | -0.72291900 | 1.58796900  | 1.01639300  |
| H | 1.15215600  | 0.24799800  | 2.09125000  |

|   |             |             |             |
|---|-------------|-------------|-------------|
| C | 2.99685100  | -0.84117600 | 0.40339000  |
| H | 3.19120400  | -0.78232100 | 1.47967100  |
| H | 3.16178800  | -1.88086100 | 0.10005200  |
| C | 4.00967700  | 0.05440900  | -0.33220200 |
| H | 3.80944600  | -0.01910900 | -1.40788200 |
| C | 5.42980700  | -0.44656700 | -0.07224000 |
| H | 5.54755100  | -1.48678500 | -0.38595700 |
| H | 6.16331300  | 0.15782100  | -0.61108700 |
| H | 5.66394300  | -0.38663400 | 0.99553600  |
| C | 3.86550700  | 1.51661300  | 0.08671600  |
| H | 2.87057800  | 1.90499000  | -0.14221800 |
| H | 4.02706100  | 1.61883100  | 1.16529100  |
| H | 4.60181400  | 2.14068800  | -0.42538800 |
| C | -2.58850900 | 0.50382200  | -0.83189600 |
| H | -2.75688100 | 0.29849300  | -1.89569600 |
| C | -2.96111900 | 1.95804900  | -0.53435500 |
| H | -2.27146400 | 2.62923300  | -1.04799600 |
| H | -3.97509000 | 2.16776100  | -0.87361000 |
| H | -2.91561600 | 2.15774300  | 0.53773000  |
| C | -3.54332900 | -0.43683800 | -0.11097800 |
| O | -4.59218200 | -0.11407100 | 0.38394100  |
| O | -3.12362800 | -1.71236200 | -0.13402400 |
| H | -3.79898000 | -2.26061400 | 0.29176100  |
| O | -1.53770200 | -0.03506400 | 1.84464000  |
| H | -1.47988400 | -0.99707300 | 1.79160700  |

#### IMs12

|   |             |             |             |
|---|-------------|-------------|-------------|
| C | -1.14691200 | -0.97550000 | 0.91002800  |
| C | 0.17209200  | -0.67192500 | 1.22937200  |
| C | 0.94660300  | 0.13115200  | 0.39095900  |
| C | 0.36223100  | 0.62007400  | -0.77944600 |
| C | -0.95648600 | 0.30836700  | -1.10019900 |

|   |             |             |             |
|---|-------------|-------------|-------------|
| C | -1.73391700 | -0.49038800 | -0.26107300 |
| H | -1.73047200 | -1.60186800 | 1.57831000  |
| H | 0.60871200  | -1.06656800 | 2.14123600  |
| H | 0.93653000  | 1.25027700  | -1.44935400 |
| H | -1.39074200 | 0.69980400  | -2.01494800 |
| C | -3.17912500 | -0.78759400 | -0.57081400 |
| H | -3.38158200 | -0.57132100 | -1.62575600 |
| H | -3.37235700 | -1.85445200 | -0.41714100 |
| C | -4.16417300 | 0.01977400  | 0.29491300  |
| H | -3.94813600 | -0.20922600 | 1.34577700  |
| C | -5.59837100 | -0.40909800 | -0.01019600 |
| H | -5.73832100 | -1.47918300 | 0.16234900  |
| H | -6.31118300 | 0.13393400  | 0.61502300  |
| H | -5.84220100 | -0.20022900 | -1.05704700 |
| C | -3.99202300 | 1.52299400  | 0.08244400  |
| H | -2.98533500 | 1.85521200  | 0.34588900  |
| H | -4.16830900 | 1.78000200  | -0.96787200 |
| H | -4.70557000 | 2.08430700  | 0.69054100  |
| C | 2.38458500  | 0.45404500  | 0.74786600  |
| H | 2.57790900  | 0.08361400  | 1.75875400  |
| C | 2.68133800  | 1.95324300  | 0.69113600  |
| H | 1.95850900  | 2.49192600  | 1.30547300  |
| H | 3.68342400  | 2.16549000  | 1.06286200  |
| H | 2.60731000  | 2.32737600  | -0.33187500 |
| C | 3.33544100  | -0.33370700 | -0.15831000 |
| O | 3.19445600  | -0.02835800 | -1.50964600 |
| O | 3.12899100  | -1.68912900 | 0.04972300  |
| H | 3.48278100  | -2.17974000 | -0.70293700 |
| O | 4.65087100  | 0.06257800  | 0.10209000  |
| H | 5.25678700  | -0.51870500 | -0.37668800 |

IBU<sup>+</sup>

|   |             |             |             |
|---|-------------|-------------|-------------|
| C | -0.90838300 | -0.59152800 | 1.32116400  |
| C | 0.39407200  | -0.24987400 | 1.52803400  |
| C | 1.23513300  | 0.05529100  | 0.42180600  |
| C | 0.70519100  | 0.00608200  | -0.90590500 |
| C | -0.59459400 | -0.33979200 | -1.11411700 |
| C | -1.44341500 | -0.65154000 | -0.00737100 |
| H | -1.55793900 | -0.83170500 | 2.15469400  |
| H | 0.80611000  | -0.20939500 | 2.52870900  |
| H | 1.35174700  | 0.24373300  | -1.74356600 |
| H | -1.00450200 | -0.38620400 | -2.11563000 |
| C | -2.86881800 | -0.97303600 | -0.20468700 |
| H | -3.06547800 | -1.24764900 | -1.24314400 |
| H | -3.14771100 | -1.80482100 | 0.45003200  |
| C | -3.76951100 | 0.25077900  | 0.17301400  |
| H | -3.57944100 | 0.49025900  | 1.22410100  |
| C | -5.23128700 | -0.15741700 | 0.01459600  |
| H | -5.47625100 | -1.02185400 | 0.63470100  |
| H | -5.88141200 | 0.67060100  | 0.30554400  |
| H | -5.44691200 | -0.40762600 | -1.02801800 |
| C | -3.43789300 | 1.46871600  | -0.68635800 |
| H | -2.41777700 | 1.82544100  | -0.52242900 |
| H | -3.55178100 | 1.23190200  | -1.74871600 |
| H | -4.11933700 | 2.28828500  | -0.44997700 |
| C | 2.65120600  | 0.48049700  | 0.64104500  |
| H | 2.92904400  | 0.25792100  | 1.67591500  |
| C | 2.80400700  | 1.98920000  | 0.38583300  |
| H | 2.15093000  | 2.55055700  | 1.05316900  |
| H | 3.83883700  | 2.27205400  | 0.57623900  |
| H | 2.55832200  | 2.23781300  | -0.64746700 |
| C | 3.61564000  | -0.32226300 | -0.22826200 |
| O | 4.56918300  | 0.13454200  | -0.79178800 |
| O | 3.27858400  | -1.61501500 | -0.25230200 |
| H | 3.92333400  | -2.10621600 | -0.78419200 |

TS1

|   |             |             |             |
|---|-------------|-------------|-------------|
| C | 0.69783900  | 0.36307000  | 1.06584400  |
| C | -0.65115500 | 0.19666200  | 1.35643500  |
| C | -1.54584100 | -0.20854300 | 0.36583200  |
| C | -1.06375400 | -0.43017300 | -0.92469100 |
| C | 0.28455800  | -0.25491800 | -1.21581400 |
| C | 1.18716000  | 0.13428900  | -0.22319700 |
| H | 1.37843500  | 0.68317900  | 1.84850700  |
| H | -1.01381700 | 0.38362000  | 2.36168300  |
| H | -1.74569100 | -0.73865100 | -1.71127600 |
| H | 0.64426400  | -0.42932000 | -2.22453800 |
| C | 2.64756200  | 0.28783700  | -0.51914000 |
| H | 2.83973700  | 0.20421400  | -1.59367100 |
| H | 2.93293300  | 1.35694000  | -0.22975400 |
| C | 3.57697300  | -0.64751000 | 0.26045000  |
| H | 3.39370400  | -0.49643000 | 1.33037100  |
| C | 5.03754100  | -0.31538100 | -0.03680500 |
| H | 5.26577100  | 0.72284900  | 0.21592000  |
| H | 5.70634400  | -0.96239800 | 0.53529300  |
| H | 5.25225400  | -0.46376800 | -1.09990200 |
| C | 3.26849600  | -2.10738200 | -0.08280500 |
| H | 2.23594400  | -2.36694200 | 0.16195200  |
| H | 3.41990200  | -2.28490100 | -1.15251900 |
| H | 3.93114700  | -2.77798700 | 0.46939200  |
| C | -3.01724100 | -0.42471800 | 0.68436200  |
| H | -3.19155300 | -0.09956700 | 1.71272600  |
| C | -3.43425700 | -1.88432800 | 0.51326800  |
| H | -2.83657500 | -2.51391400 | 1.17362100  |
| H | -4.48913300 | -2.01811700 | 0.75784300  |
| H | -3.27687900 | -2.21128800 | -0.51545400 |
| C | -3.83672000 | 0.48421100  | -0.20941100 |

|   |             |            |             |
|---|-------------|------------|-------------|
| O | -4.44727700 | 0.13599400 | -1.18782300 |
| O | -3.78570000 | 1.76154500 | 0.19379400  |
| H | -4.28692300 | 2.30362200 | -0.43298800 |
| O | 3.36058000  | 2.80397100 | 0.10316800  |
| H | 3.91234900  | 2.93808600 | -0.68628700 |

TS2

|   |             |             |             |
|---|-------------|-------------|-------------|
| C | 0.68076800  | 0.90714500  | -0.68966900 |
| C | -0.61561600 | 1.25929400  | -0.32829200 |
| C | -1.51603700 | 0.29190000  | 0.11652800  |
| C | -1.09276800 | -1.03569800 | 0.18699400  |
| C | 0.20337100  | -1.38538800 | -0.17802200 |
| C | 1.10916700  | -0.41999400 | -0.62009400 |
| H | 1.37284700  | 1.67295300  | -1.02601700 |
| H | -0.93125300 | 2.29544600  | -0.39294300 |
| H | -1.78050500 | -1.80469600 | 0.52589700  |
| H | 0.51646000  | -2.42284700 | -0.11736100 |
| C | 2.52910300  | -0.77737400 | -0.98037100 |
| H | 2.61979500  | -1.86372400 | -1.09957200 |
| H | 2.78991600  | -0.32468600 | -1.94214900 |
| C | 3.55577100  | -0.32722300 | 0.06744200  |
| H | 3.42585100  | 0.80574800  | 0.14694300  |
| C | 4.97901100  | -0.59076800 | -0.40229500 |
| H | 5.17161600  | -0.11663200 | -1.36758400 |
| H | 5.70852300  | -0.21782300 | 0.32066300  |
| H | 5.14093200  | -1.66805300 | -0.51534000 |
| C | 3.28715200  | -0.90039500 | 1.45091800  |
| H | 2.29165700  | -0.63389200 | 1.81142500  |
| H | 3.35373300  | -1.99396700 | 1.41690100  |
| H | 4.02472500  | -0.53885400 | 2.17077200  |
| C | -2.92810400 | 0.67367400  | 0.53401000  |
| H | -3.06839600 | 1.73557100  | 0.31861600  |



|   |             |             |             |
|---|-------------|-------------|-------------|
| C | -3.19084900 | 0.39782100  | 2.01332700  |
| H | -2.48356300 | 0.96350800  | 2.62107900  |
| H | -4.20503800 | 0.69203600  | 2.28855000  |
| H | -3.07069600 | -0.66346900 | 2.23533600  |
| C | -3.90448600 | -0.08522500 | -0.34124800 |
| O | -4.53393200 | -1.05661500 | -0.00632600 |
| O | -3.97592000 | 0.43074200  | -1.57645000 |
| H | -4.57907700 | -0.11298100 | -2.10421500 |
| O | 3.58532500  | 2.35440100  | 0.23645700  |
| H | 4.51979900  | 2.32153300  | 0.50418800  |

TS3

|   |             |             |             |
|---|-------------|-------------|-------------|
| C | -0.34933500 | -1.05917200 | 1.15068100  |
| C | 0.92347400  | -0.56067800 | 1.41006000  |
| C | 1.66611500  | 0.04785800  | 0.39956400  |
| C | 1.11136900  | 0.13783800  | -0.87807300 |
| C | -0.15887700 | -0.36620700 | -1.13464200 |
| C | -0.91096100 | -0.96887000 | -0.12421600 |
| H | -0.91305700 | -1.53010000 | 1.95041800  |
| H | 1.34332900  | -0.64689400 | 2.40683500  |
| H | 1.67606400  | 0.60328600  | -1.68061800 |
| H | -0.57515300 | -0.28740400 | -2.13403400 |
| C | -2.31045400 | -1.46656100 | -0.38020800 |
| H | -2.46561100 | -1.60328400 | -1.45568800 |
| H | -2.44587500 | -2.44376200 | 0.09411900  |
| C | -3.40211200 | -0.51621400 | 0.15910800  |
| H | -3.23181000 | -0.39011300 | 1.23464000  |
| C | -4.78421800 | -1.12961200 | -0.05671700 |
| H | -4.86368200 | -2.10295800 | 0.43268200  |
| H | -5.56485300 | -0.47906400 | 0.34344600  |
| H | -4.97420800 | -1.27026100 | -1.12551500 |
| C | -3.30193900 | 0.84414000  | -0.50901400 |

|   |             |             |             |
|---|-------------|-------------|-------------|
| H | -2.36174100 | 1.36532200  | -0.31931300 |
| H | -3.49562400 | 0.79538700  | -1.58423100 |
| H | -4.11525100 | 1.53927300  | -0.06102600 |
| C | 3.04451000  | 0.62468900  | 0.68293300  |
| H | 3.32536600  | 0.34481200  | 1.70128600  |
| C | 3.07569100  | 2.14374100  | 0.52546800  |
| H | 2.35821000  | 2.59531900  | 1.21181100  |
| H | 4.06949700  | 2.53734200  | 0.74497000  |
| H | 2.81109000  | 2.42957000  | -0.49367500 |
| C | 4.04150600  | -0.03927200 | -0.24459200 |
| O | 4.52910400  | 0.46581800  | -1.22362200 |
| O | 4.31141100  | -1.29822000 | 0.12896100  |
| H | 4.91555000  | -1.69020900 | -0.51868100 |
| O | -5.28437500 | 2.32753300  | 0.31103400  |
| H | -5.80996400 | 2.12261600  | -0.48052000 |

#### TS4

|   |             |             |             |
|---|-------------|-------------|-------------|
| C | 0.92343300  | -1.02458400 | 0.49219600  |
| C | -0.41616300 | -0.93966500 | 0.14258300  |
| C | -1.01558300 | 0.30310900  | -0.09439000 |
| C | -0.23440000 | 1.45276400  | 0.02432000  |
| C | 1.10869700  | 1.35973000  | 0.38032900  |
| C | 1.70962600  | 0.12519500  | 0.62075100  |
| H | 1.36952400  | -1.99830200 | 0.67025900  |
| H | -1.00673700 | -1.84443500 | 0.04739800  |
| H | -0.66573400 | 2.43030200  | -0.15388100 |
| H | 1.69890900  | 2.26621200  | 0.46925800  |
| C | 3.17173200  | 0.01406300  | 0.96628200  |
| H | 3.54036700  | 0.98180600  | 1.32383800  |
| H | 3.29574100  | -0.70236500 | 1.78477600  |
| C | 4.04556500  | -0.43812600 | -0.21901700 |
| H | 3.66189400  | -1.40506900 | -0.56692700 |

|   |             |             |             |
|---|-------------|-------------|-------------|
| C | 5.48903700  | -0.62631600 | 0.24505200  |
| H | 5.55373100  | -1.35334700 | 1.05846100  |
| H | 6.12195400  | -0.97332300 | -0.57516200 |
| H | 5.89742800  | 0.32305500  | 0.60666000  |
| C | 3.97596200  | 0.55639200  | -1.37666000 |
| H | 2.95879600  | 0.66070000  | -1.76082200 |
| H | 4.31623200  | 1.54426900  | -1.04768500 |
| H | 4.61839000  | 0.23603200  | -2.20043100 |
| C | -2.48388400 | 0.37467700  | -0.45643300 |
| H | -2.64884300 | -0.42348900 | -1.27620900 |
| C | -2.97954300 | 1.70158800  | -1.00309500 |
| H | -2.37092200 | 2.01046700  | -1.85348400 |
| H | -4.01652700 | 1.61022500  | -1.32848700 |
| H | -2.93457100 | 2.47608700  | -0.23468700 |
| C | -3.31429900 | -0.07331600 | 0.73117000  |
| O | -3.78218600 | 0.66689500  | 1.55444500  |
| O | -3.45495300 | -1.40708300 | 0.78467000  |
| H | -3.94563400 | -1.64376900 | 1.58639900  |
| O | -3.00992800 | -1.60723100 | -2.08112200 |
| H | -3.34853500 | -2.12877100 | -1.33174200 |

#### TS5

|   |             |             |             |
|---|-------------|-------------|-------------|
| C | -0.94963800 | -0.56864000 | 1.29267600  |
| C | 0.38864800  | -0.20680100 | 1.40903900  |
| C | 1.18973100  | -0.08722400 | 0.27342900  |
| C | 0.63022600  | -0.35461200 | -0.97648900 |
| C | -0.70746000 | -0.71888400 | -1.08629200 |
| C | -1.52017400 | -0.82536200 | 0.04414900  |
| H | -1.56019200 | -0.65062300 | 2.18660500  |
| H | 0.81256300  | -0.00841500 | 2.38807700  |
| H | 1.24081000  | -0.27716200 | -1.87097700 |
| H | -1.12981700 | -0.91608200 | -2.06631000 |

|   |             |             |             |
|---|-------------|-------------|-------------|
| C | -2.98594700 | -1.15626600 | -0.06947300 |
| H | -3.19334700 | -1.57004700 | -1.06249400 |
| H | -3.24260900 | -1.92820700 | 0.66331700  |
| C | -3.89793600 | 0.06368400  | 0.15803100  |
| H | -3.68909400 | 0.45340200  | 1.16192800  |
| C | -5.36329100 | -0.36495800 | 0.10093900  |
| H | -5.57612300 | -1.14755700 | 0.83351500  |
| H | -6.02626500 | 0.48006300  | 0.30144500  |
| H | -5.60672400 | -0.75552100 | -0.89242800 |
| C | -3.61621900 | 1.16953200  | -0.85818400 |
| H | -2.58945100 | 1.53588000  | -0.78404600 |
| H | -3.76888200 | 0.79626400  | -1.87668100 |
| H | -4.29054200 | 2.01541300  | -0.70456000 |
| C | 2.63367700  | 0.37829800  | 0.38963100  |
| H | 2.87371200  | 0.49008500  | 1.44910400  |
| C | 2.86642500  | 1.68947800  | -0.34199400 |
| H | 2.08584000  | 2.47189100  | 0.07165500  |
| H | 3.84447300  | 2.12939800  | -0.14575800 |
| H | 2.67212600  | 1.62229900  | -1.41180200 |
| C | 3.53630300  | -0.71030700 | -0.16371400 |
| O | 4.03351800  | -0.70877400 | -1.26005100 |
| O | 3.69167600  | -1.71362000 | 0.70739100  |
| H | 4.23287400  | -2.40309200 | 0.29469100  |
| O | 0.94161500  | 3.10741600  | 0.54233700  |
| H | 0.35010100  | 2.33421800  | 0.51682400  |

TS6

|   |             |             |             |
|---|-------------|-------------|-------------|
| C | -0.38492300 | -0.30048700 | 1.46478100  |
| C | 0.99165800  | -0.13930900 | 1.58218600  |
| C | 1.76059000  | 0.20942700  | 0.47362500  |
| C | 1.12767200  | 0.38842300  | -0.75879100 |
| C | -0.24565700 | 0.22187500  | -0.87826600 |

|   |             |             |             |
|---|-------------|-------------|-------------|
| C | -1.01717500 | -0.12044600 | 0.23405700  |
| H | -0.97506300 | -0.56712100 | 2.33501700  |
| H | 1.47029300  | -0.28233700 | 2.54508800  |
| H | 1.71305800  | 0.65237200  | -1.63439200 |
| H | -0.71995700 | 0.35361300  | -1.84514500 |
| C | -2.51466600 | -0.29460500 | 0.14294600  |
| H | -2.74603200 | -0.79000200 | -0.98416400 |
| C | -3.41266900 | 0.97096600  | 0.19587500  |
| H | -3.29951300 | 1.36416500  | 1.21381700  |
| C | -4.87486300 | 0.60512900  | -0.03923100 |
| H | -5.21488200 | -0.16075600 | 0.65761400  |
| H | -5.50146700 | 1.49080100  | 0.08405800  |
| H | -5.01353300 | 0.22762000  | -1.05651200 |
| C | -2.94841400 | 2.03970200  | -0.79079900 |
| H | -1.92731700 | 2.36833300  | -0.59232800 |
| H | -2.99727700 | 1.66430100  | -1.81791000 |
| H | -3.60296300 | 2.91094000  | -0.72062800 |
| C | 3.25958000  | 0.42455900  | 0.60361200  |
| H | 3.56309600  | 0.09661800  | 1.60078900  |
| C | 3.64690100  | 1.88660100  | 0.38883200  |
| H | 3.13658200  | 2.51036500  | 1.12369200  |
| H | 4.72396800  | 2.02206300  | 0.49878400  |
| H | 3.35912100  | 2.21820000  | -0.60993600 |
| C | 3.96623000  | -0.47856500 | -0.38752100 |
| O | 4.48362600  | -0.11872600 | -1.41376500 |
| O | 3.93064400  | -1.76284600 | -0.00612000 |
| H | 4.35944400  | -2.30073500 | -0.68790600 |
| O | -2.98575200 | -1.34442700 | 0.76500900  |
| O | -3.27936900 | -2.17839100 | -0.88071200 |
| H | -3.64635300 | -3.02295400 | -1.21306400 |

TS6-H<sub>2</sub>O

|   |             |             |             |
|---|-------------|-------------|-------------|
| C | -0.11541800 | 0.09497800  | -1.56842400 |
| C | 1.27109500  | 0.00913300  | -1.63752100 |
| C | 2.02105000  | -0.28499900 | -0.50010900 |
| C | 1.35615100  | -0.48332400 | 0.71154000  |
| C | -0.02811700 | -0.38932400 | 0.78179700  |
| C | -0.78425800 | -0.10553600 | -0.35923700 |
| H | -0.68797900 | 0.32164200  | -2.46088300 |
| H | 1.77364700  | 0.16701200  | -2.58599000 |
| H | 1.92338600  | -0.70279500 | 1.61100000  |
| H | -0.52156700 | -0.53617400 | 1.73710000  |
| C | -2.29227400 | -0.00240500 | -0.31029000 |
| H | -2.53017100 | 0.45999200  | 0.86076000  |
| C | -3.14431600 | -1.30778800 | -0.24772600 |
| H | -3.02224200 | -1.79512300 | -1.22304800 |
| C | -4.61842600 | -0.96489600 | -0.04589400 |
| H | -4.97689300 | -0.27485700 | -0.80977900 |
| H | -5.22068100 | -1.87487200 | -0.08924900 |
| H | -4.77187300 | -0.50399800 | 0.93473800  |
| C | -2.65719600 | -2.26634900 | 0.83609000  |
| H | -1.62365800 | -2.57730800 | 0.67773200  |
| H | -2.73282400 | -1.80437600 | 1.82599800  |
| H | -3.28183600 | -3.16250200 | 0.83750000  |
| C | 3.53412500  | -0.41152500 | -0.57448000 |
| H | 3.84921900  | -0.11002500 | -1.57631700 |
| C | 4.00841400  | -1.83285000 | -0.27826900 |
| H | 3.56260200  | -2.52336500 | -0.99524000 |
| H | 5.09487000  | -1.90188100 | -0.35237800 |
| H | 3.71376500  | -2.13633300 | 0.72734000  |
| C | 4.14677400  | 0.58040200  | 0.39427500  |
| O | 4.64137300  | 0.30412700  | 1.45716100  |
| O | 4.05265500  | 1.83991500  | -0.05409500 |
| H | 4.42182300  | 2.43481700  | 0.61512000  |
| O | -2.79211200 | 0.89203500  | -1.12771000 |

|   |             |            |             |
|---|-------------|------------|-------------|
| O | -3.36022700 | 2.39857200 | -0.29084000 |
| H | -2.67205300 | 2.97156900 | -0.65069400 |
| O | -2.93855600 | 1.32729400 | 1.81225600  |
| H | -3.13784700 | 2.00035600 | 1.02420700  |
| H | -2.17036800 | 1.63957900 | 2.30738300  |

TS6-NH<sub>3</sub>

|   |             |             |             |
|---|-------------|-------------|-------------|
| C | -0.11049200 | -0.29765800 | 1.55896200  |
| C | 1.27739200  | -0.23132100 | 1.63009400  |
| C | 2.02522300  | 0.21113500  | 0.54061300  |
| C | 1.35209600  | 0.56671600  | -0.62965500 |
| C | -0.03342300 | 0.48924200  | -0.70262800 |
| C | -0.79547800 | 0.06887800  | 0.39534900  |
| H | -0.67812400 | -0.63779200 | 2.41752500  |
| H | 1.78414200  | -0.51637000 | 2.54654800  |
| H | 1.91571600  | 0.89489300  | -1.49809200 |
| H | -0.52568100 | 0.75434400  | -1.63209700 |
| C | -2.29966000 | -0.02413300 | 0.33451700  |
| H | -2.50298600 | -0.53670800 | -0.93051000 |
| C | -3.14456200 | 1.27472100  | 0.28630700  |
| H | -3.08101200 | 1.73573400  | 1.28213000  |
| C | -4.61112100 | 0.93695100  | 0.01355100  |
| H | -4.98200900 | 0.18728600  | 0.71299300  |
| H | -5.22888300 | 1.83390900  | 0.10230000  |
| H | -4.73730400 | 0.54680700  | -1.00168400 |
| C | -2.64101000 | 2.30007000  | -0.72887800 |
| H | -1.62456900 | 2.63087000  | -0.51081500 |
| H | -2.65804900 | 1.89235200  | -1.74527000 |
| H | -3.29045100 | 3.17897200  | -0.71502800 |
| C | 3.53905800  | 0.32919300  | 0.62476500  |
| H | 3.85960400  | -0.09739200 | 1.57826500  |
| C | 4.00840300  | 1.77871400  | 0.51028600  |

|   |             |             |             |
|---|-------------|-------------|-------------|
| H | 3.56673600  | 2.36806100  | 1.31491000  |
| H | 5.09545600  | 1.84378300  | 0.58159900  |
| H | 3.69990600  | 2.20735400  | -0.44437200 |
| C | 4.14636600  | -0.52670400 | -0.46761000 |
| O | 4.59995200  | -0.11601100 | -1.50584300 |
| O | 4.09756200  | -1.83260500 | -0.16832500 |
| H | 4.45649800  | -2.33352100 | -0.91539400 |
| O | -2.80175800 | -0.91769000 | 1.15984900  |
| O | -3.37350300 | -2.33223400 | 0.32160700  |
| H | -3.78202500 | -2.72311600 | 1.10178300  |
| H | -3.32426400 | -1.98283200 | -1.63683900 |
| N | -2.75260300 | -1.22629900 | -2.01559300 |
| H | -3.25224900 | -0.71900100 | -2.74146500 |
| H | -1.89701700 | -1.61005500 | -2.40967900 |

TS6-CH<sub>3</sub>OH

|   |             |             |             |
|---|-------------|-------------|-------------|
| C | -0.02880100 | -0.63387500 | 1.58245600  |
| C | -1.41887100 | -0.68449400 | 1.59232800  |
| C | -2.14371000 | -0.53039100 | 0.41231600  |
| C | -1.44875200 | -0.31455000 | -0.77938900 |
| C | -0.06097600 | -0.25545000 | -0.78708400 |
| C | 0.67083100  | -0.42112400 | 0.39265700  |
| H | 0.52217100  | -0.75978400 | 2.50742700  |
| H | -1.94407200 | -0.85266700 | 2.52663000  |
| H | -1.99436600 | -0.17932300 | -1.70819800 |
| H | 0.45546700  | -0.07514200 | -1.72368300 |
| C | 2.18288700  | -0.36342700 | 0.40732500  |
| H | 2.46088100  | 0.53998000  | -0.46420200 |
| C | 3.00266400  | -1.55555300 | -0.17569100 |
| H | 2.86196000  | -2.39043200 | 0.52203000  |
| C | 4.48631800  | -1.19543300 | -0.22149900 |
| H | 4.84391700  | -0.85533100 | 0.75043500  |



|   |             |             |             |
|---|-------------|-------------|-------------|
| H | 5.07229300  | -2.06683600 | -0.52153600 |
| H | 4.66310400  | -0.40014000 | -0.95218000 |
| C | 2.51213400  | -1.99153600 | -1.55395300 |
| H | 1.47463500  | -2.32758000 | -1.53602200 |
| H | 2.60002400  | -1.17307600 | -2.27641200 |
| H | 3.12750200  | -2.81990600 | -1.91251100 |
| C | -3.66153900 | -0.61843400 | 0.41255900  |
| H | -3.99531800 | -0.68623900 | 1.45060900  |
| C | -4.16860100 | -1.81860400 | -0.38502400 |
| H | -3.76106500 | -2.73717000 | 0.03889300  |
| H | -5.25810800 | -1.87079800 | -0.35598000 |
| H | -3.85649200 | -1.74750500 | -1.42792500 |
| C | -4.21451200 | 0.67807600  | -0.14437400 |
| O | -4.65905000 | 0.82757300  | -1.25398400 |
| O | -4.12639900 | 1.68040700  | 0.74083300  |
| H | -4.45177000 | 2.49167900  | 0.32372500  |
| O | 2.68492700  | 0.08752900  | 1.53254700  |
| O | 3.35033400  | 1.76252300  | 1.40207200  |
| H | 2.68265600  | 2.17989500  | 1.96041500  |
| O | 2.90787700  | 1.70478800  | -0.96763600 |
| H | 3.16618700  | 1.96148300  | 0.00823600  |
| C | 1.84562600  | 2.54028900  | -1.44128100 |
| H | 1.47954600  | 2.12853700  | -2.38017600 |
| H | 1.03003000  | 2.57967700  | -0.71400300 |
| H | 2.23111600  | 3.54515700  | -1.61431000 |

TS6-C<sub>2</sub>H<sub>5</sub>OH

|   |             |             |             |
|---|-------------|-------------|-------------|
| C | -0.23909100 | -1.16320100 | 1.44809800  |
| C | -1.62899500 | -1.10889400 | 1.43694000  |
| C | -2.31392400 | -0.67594400 | 0.30327100  |
| C | -1.57858900 | -0.29135700 | -0.81998000 |
| C | -0.19070400 | -0.33731100 | -0.80514600 |

|   |             |             |             |
|---|-------------|-------------|-------------|
| C | 0.50077200  | -0.77957100 | 0.32727300  |
| H | 0.28153700  | -1.50311900 | 2.33598500  |
| H | -2.18653900 | -1.40952500 | 2.31784800  |
| H | -2.09312800 | 0.06042100  | -1.70897000 |
| H | 0.35905400  | -0.01738300 | -1.68383400 |
| C | 2.01316600  | -0.82588800 | 0.36814300  |
| H | 2.35147500  | 0.22678300  | -0.28849200 |
| C | 2.77756100  | -1.91439500 | -0.44396600 |
| H | 2.57740100  | -2.86850100 | 0.05937700  |
| C | 4.27927800  | -1.63856600 | -0.39701500 |
| H | 4.63582200  | -1.54558200 | 0.62888400  |
| H | 4.82281400  | -2.45267600 | -0.88136100 |
| H | 4.51436800  | -0.71133600 | -0.92891700 |
| C | 2.29598800  | -2.02313100 | -1.88862000 |
| H | 1.24176800  | -2.29571300 | -1.95295800 |
| H | 2.44368200  | -1.07727900 | -2.42056200 |
| H | 2.87360400  | -2.79143900 | -2.40766300 |
| C | -3.83364000 | -0.63635300 | 0.27722200  |
| H | -4.19543600 | -0.88522800 | 1.27762600  |
| C | -4.41946300 | -1.60250100 | -0.75106800 |
| H | -4.10109400 | -2.61943600 | -0.51861300 |
| H | -5.50984300 | -1.56407200 | -0.74063100 |
| H | -4.07742100 | -1.35071600 | -1.75584700 |
| C | -4.26754200 | 0.78815900  | -0.00533700 |
| O | -4.67302200 | 1.19767500  | -1.06327900 |
| O | -4.11960000 | 1.57870200  | 1.06697700  |
| H | -4.37245700 | 2.48103900  | 0.82231900  |
| O | 2.51463100  | -0.65216700 | 1.56864200  |
| O | 3.29829100  | 0.95899900  | 1.79474700  |
| H | 2.65561700  | 1.29334900  | 2.43297800  |
| O | 2.85605500  | 1.45107600  | -0.53150100 |
| H | 3.14059000  | 1.46500900  | 0.46850900  |
| C | 1.81809400  | 2.42498900  | -0.74467900 |

|   |            |            |             |
|---|------------|------------|-------------|
| H | 1.40259300 | 2.23141300 | -1.73399000 |
| H | 1.02792600 | 2.27283800 | -0.00148100 |
| C | 2.38923300 | 3.82611900 | -0.65584700 |
| H | 1.60145000 | 4.55955000 | -0.83830600 |
| H | 2.80674700 | 4.00831200 | 0.33661800  |
| H | 3.17577500 | 3.96609400 | -1.39892800 |

#### TS6-HCOOH

|   |             |             |             |
|---|-------------|-------------|-------------|
| C | -0.24531100 | -1.55208600 | 1.01720700  |
| C | -1.63177600 | -1.55281600 | 0.91537700  |
| C | -2.27816400 | -0.66884100 | 0.05245700  |
| C | -1.51381200 | 0.22286400  | -0.70373700 |
| C | -0.12825100 | 0.22855600  | -0.60165100 |
| C | 0.51591900  | -0.66292400 | 0.25830100  |
| H | 0.25017400  | -2.24617700 | 1.68785000  |
| H | -2.21640600 | -2.24856400 | 1.50740900  |
| H | -2.00468000 | 0.92371300  | -1.37190000 |
| H | 0.45873900  | 0.93032300  | -1.18750500 |
| C | 2.01452500  | -0.67198500 | 0.37080800  |
| H | 2.44863100  | 0.33924800  | -0.04134500 |
| C | 2.83671500  | -1.62896700 | -0.60941400 |
| H | 2.57040800  | -2.64641200 | -0.30740600 |
| C | 4.33099400  | -1.40180900 | -0.43924900 |
| H | 4.65456300  | -1.58125300 | 0.58552300  |
| H | 4.87590100  | -2.08252000 | -1.09657800 |
| H | 4.59533400  | -0.37695400 | -0.71485400 |
| C | 2.38357200  | -1.38322700 | -2.04376500 |
| H | 1.32542000  | -1.60531400 | -2.18457500 |
| H | 2.56473700  | -0.34314700 | -2.33246000 |
| H | 2.95886900  | -2.02949500 | -2.71056000 |
| C | -3.79207600 | -0.68631800 | -0.08566600 |
| H | -4.19126100 | -1.37930600 | 0.65880000  |

|   |             |             |             |
|---|-------------|-------------|-------------|
| C | -4.23614800 | -1.10489200 | -1.48623800 |
| H | -3.85111600 | -2.10103100 | -1.70750500 |
| H | -5.32467400 | -1.12422300 | -1.55697000 |
| H | -3.85590600 | -0.40943100 | -2.23582800 |
| C | -4.32193600 | 0.68971500  | 0.26697900  |
| O | -4.72552500 | 1.50534100  | -0.52197300 |
| O | -4.26657800 | 0.92274900  | 1.58541100  |
| H | -4.57903100 | 1.82371800  | 1.75470800  |
| O | 2.47755800  | -0.81874400 | 1.59912000  |
| O | 2.83618000  | 0.77517300  | 2.37079100  |
| H | 1.98142900  | 0.94913100  | 2.79206900  |
| O | 3.05206000  | 1.77454500  | 0.19825500  |
| H | 2.94022600  | 1.40742300  | 1.53195000  |
| C | 2.62340300  | 2.76107700  | -0.52572200 |
| O | 2.16912800  | 2.65623100  | -1.64967200 |
| H | 2.71013100  | 3.74783200  | -0.04041200 |

TS6-CH<sub>3</sub>COOH

|   |             |             |             |
|---|-------------|-------------|-------------|
| C | -0.49853800 | -1.65942300 | 1.11012800  |
| C | -1.88185700 | -1.55253700 | 1.02134900  |
| C | -2.46711900 | -0.68418100 | 0.10063700  |
| C | -1.64325900 | 0.08337400  | -0.72613100 |
| C | -0.26051300 | -0.01724200 | -0.63581000 |
| C | 0.32276500  | -0.89395900 | 0.28162800  |
| H | -0.05184400 | -2.34230100 | 1.82501200  |
| H | -2.51223900 | -2.15360300 | 1.66791800  |
| H | -2.08439300 | 0.77197700  | -1.44017600 |
| H | 0.37193800  | 0.59150300  | -1.27561400 |
| C | 1.81907000  | -1.02033200 | 0.38297800  |
| H | 2.31735700  | -0.04648600 | -0.07735400 |
| C | 2.55097600  | -2.06906400 | -0.55760700 |
| H | 2.20383800  | -3.05223500 | -0.22391400 |

|   |             |             |             |
|---|-------------|-------------|-------------|
| C | 4.06067400  | -1.96477800 | -0.39155100 |
| H | 4.36729000  | -2.13436400 | 0.64027300  |
| H | 4.54653800  | -2.71154200 | -1.02290400 |
| H | 4.41075500  | -0.97603300 | -0.70129500 |
| C | 2.12661200  | -1.84217400 | -2.00439200 |
| H | 1.05313100  | -1.97549600 | -2.14306600 |
| H | 2.39737100  | -0.83299800 | -2.33085300 |
| H | 2.64366500  | -2.55990700 | -2.64503000 |
| C | -3.97947700 | -0.58883700 | -0.02212600 |
| H | -4.42184300 | -1.18778400 | 0.77731100  |
| C | -4.47802300 | -1.07391400 | -1.38235000 |
| H | -4.17628500 | -2.11110400 | -1.53292100 |
| H | -5.56584700 | -1.01178600 | -1.43961500 |
| H | -4.05750500 | -0.46781900 | -2.18595300 |
| C | -4.39024100 | 0.84884800  | 0.22733200  |
| O | -4.71879400 | 1.63739900  | -0.62145000 |
| O | -4.31948000 | 1.17049600  | 1.52640300  |
| H | -4.55360700 | 2.10478000  | 1.62800300  |
| O | 2.27675800  | -1.13051900 | 1.61832200  |
| O | 2.83088500  | 0.45273200  | 2.27353300  |
| H | 2.01871900  | 0.72523300  | 2.72503300  |
| O | 3.03808400  | 1.30367200  | 0.06582700  |
| H | 2.95304300  | 1.03368000  | 1.36985500  |
| C | 2.60859100  | 2.32491800  | -0.63849100 |
| O | 2.14862100  | 2.19815200  | -1.75954900 |
| C | 2.73865200  | 3.66463600  | 0.04716100  |
| H | 2.15212300  | 3.65321000  | 0.96842300  |
| H | 3.78086900  | 3.83499700  | 0.32111800  |
| H | 2.38845900  | 4.46061500  | -0.60546300 |

TS7

|   |            |            |            |
|---|------------|------------|------------|
| C | 0.35046500 | 1.15867200 | 0.11750400 |
|---|------------|------------|------------|

|   |             |             |             |
|---|-------------|-------------|-------------|
| C | -1.02682700 | 1.01572600  | 0.18790100  |
| C | -1.69310000 | 0.11152300  | -0.64624300 |
| C | -0.95455100 | -0.64008800 | -1.55716100 |
| C | 0.42797000  | -0.49854800 | -1.63148500 |
| C | 1.08686900  | 0.39676400  | -0.79200800 |
| H | 0.86900200  | 1.85830800  | 0.76351900  |
| H | -1.59327400 | 1.60865500  | 0.89945900  |
| H | -1.46086000 | -1.33847300 | -2.21435300 |
| H | 0.99228100  | -1.07983700 | -2.35429000 |
| C | 2.56628700  | 0.54124100  | -0.87610800 |
| H | 3.06789200  | 0.03723600  | -1.71558700 |
| C | 3.25224600  | -1.00287600 | 0.26461700  |
| H | 4.20857100  | -0.48764000 | 0.28994700  |
| C | 3.13979900  | -2.24591500 | -0.53737600 |
| H | 3.68462900  | -2.20178100 | -1.47885700 |
| H | 3.59864900  | -3.03269200 | 0.07916400  |
| H | 2.10098400  | -2.53734500 | -0.70040300 |
| C | 2.46228300  | -0.88280000 | 1.50386300  |
| H | 2.38025600  | 0.15801600  | 1.81699600  |
| H | 1.49954400  | -1.39047300 | 1.44516600  |
| H | 3.08376200  | -1.36873900 | 2.27505500  |
| C | -3.20582400 | -0.02142000 | -0.57843600 |
| H | -3.50082500 | -0.85375400 | -1.22154300 |
| C | -3.91392200 | 1.26008600  | -1.01490500 |
| H | -3.63401800 | 1.50011400  | -2.04142800 |
| H | -4.99715000 | 1.13933400  | -0.96456200 |
| H | -3.63122900 | 2.09522700  | -0.37249200 |
| C | -3.59107800 | -0.40275900 | 0.83721700  |
| O | -4.06172400 | 0.34357300  | 1.65701700  |
| O | -3.31742900 | -1.68802300 | 1.09941200  |
| H | -3.54559100 | -1.87172500 | 2.02264800  |
| O | 3.14632000  | 1.54523000  | -0.38754200 |
| O | 4.10538000  | 1.40144800  | 1.46699500  |

|   |            |            |            |
|---|------------|------------|------------|
| H | 4.49329600 | 2.21012100 | 1.12021300 |
|---|------------|------------|------------|

TS8

|   |             |             |             |
|---|-------------|-------------|-------------|
| C | -1.00219600 | -0.10365000 | 1.01293100  |
| C | 0.35190500  | -0.21885100 | 1.29865200  |
| C | 1.31664900  | 0.27690500  | 0.42106600  |
| C | 0.89043100  | 0.88684000  | -0.76134100 |
| C | -0.46121300 | 0.99958000  | -1.05128200 |
| C | -1.44158600 | 0.51472800  | -0.16904800 |
| H | -1.72127900 | -0.50774200 | 1.71628200  |
| H | 0.66492600  | -0.70530300 | 2.21672000  |
| H | 1.62241700  | 1.27089800  | -1.46542600 |
| H | -0.77312000 | 1.47186400  | -1.97711100 |
| C | -2.85095300 | 0.64756900  | -0.52154300 |
| H | -3.05440800 | 1.02827100  | -1.52038900 |
| C | -3.90518800 | 0.25628800  | 0.24536300  |
| H | -3.73849200 | 0.02118500  | 1.29260200  |
| C | -3.93873100 | -2.03459700 | -0.07658400 |
| H | -2.88764600 | -2.26703500 | 0.03461200  |
| H | -4.60098600 | -2.30888300 | 0.73497500  |
| H | -4.34871100 | -2.04013700 | -1.07789300 |
| C | -5.32834400 | 0.55368300  | -0.14308900 |
| H | -5.65036400 | 1.49991700  | 0.30268500  |
| H | -5.42700500 | 0.63870500  | -1.22719300 |
| H | -6.01110700 | -0.22154600 | 0.20748500  |
| C | 2.79870000  | 0.16333200  | 0.74103000  |
| H | 2.90084900  | -0.40104800 | 1.67080900  |
| C | 3.47255000  | 1.52801400  | 0.87551800  |
| H | 2.99135200  | 2.09432300  | 1.67387100  |
| H | 4.53185900  | 1.41547800  | 1.11210100  |
| H | 3.38771000  | 2.09312700  | -0.05359500 |
| C | 3.45282200  | -0.66025900 | -0.34994600 |

|   |            |             |             |
|---|------------|-------------|-------------|
| O | 4.10780000 | -0.21907300 | -1.25979800 |
| O | 3.19168100 | -1.96833700 | -0.21621300 |
| H | 3.58908700 | -2.44029800 | -0.96279500 |

TS9

|   |             |             |             |
|---|-------------|-------------|-------------|
| C | 0.69888100  | 0.82390500  | -0.87612400 |
| C | -0.65922900 | 0.98236100  | -1.09712500 |
| C | -1.59297000 | 0.63166800  | -0.11762500 |
| C | -1.13424900 | 0.10794000  | 1.09452600  |
| C | 0.22188400  | -0.05766900 | 1.32183600  |
| C | 1.17503600  | 0.30938400  | 0.34892900  |
| H | 1.39722500  | 1.10524800  | -1.65566800 |
| H | -1.00560100 | 1.38203500  | -2.04429700 |
| H | -1.84579300 | -0.18093500 | 1.86200400  |
| H | 0.56555400  | -0.47058200 | 2.26452800  |
| C | 2.55487100  | 0.04415400  | 0.59040900  |
| H | 2.82539100  | -0.25763200 | 1.59895400  |
| C | 3.67575700  | 0.44542900  | -0.31519100 |
| H | 3.39472200  | 0.21894800  | -1.34990300 |
| C | 4.95363600  | -0.32417700 | 0.02462800  |
| H | 4.80902100  | -1.40152200 | -0.06922900 |
| H | 5.76556400  | -0.02655500 | -0.64190400 |
| H | 5.26185500  | -0.10664500 | 1.05161600  |
| C | 3.91980200  | 1.96178500  | -0.20113000 |
| H | 3.02780000  | 2.53420200  | -0.46243600 |
| H | 4.20383200  | 2.22072100  | 0.82267700  |
| H | 4.73286000  | 2.26090100  | -0.86690900 |
| C | -3.08071100 | 0.82397200  | -0.35641900 |
| H | -3.21901700 | 1.14275200  | -1.39225200 |
| C | -3.69112000 | 1.84989800  | 0.59744100  |
| H | -3.19231400 | 2.81103700  | 0.46751400  |
| H | -4.75649400 | 1.97665300  | 0.39871200  |



|   |             |             |             |
|---|-------------|-------------|-------------|
| H | -3.57120800 | 1.53192600  | 1.63397800  |
| C | -3.76293900 | -0.52293100 | -0.21601900 |
| O | -4.41776500 | -0.87779900 | 0.73063500  |
| O | -3.52912800 | -1.31381300 | -1.27230800 |
| H | -3.94988000 | -2.17203300 | -1.11580100 |
| O | 1.26955000  | -2.54557000 | -0.07364200 |
| O | 2.41291700  | -2.14067300 | -0.04598400 |

TS10

|   |             |             |             |
|---|-------------|-------------|-------------|
| C | -0.41830900 | -0.82987500 | 1.21691700  |
| C | 0.95498800  | -0.70670500 | 1.39553100  |
| C | 1.72340800  | 0.03785400  | 0.50344500  |
| C | 1.09296700  | 0.65532500  | -0.58075400 |
| C | -0.27710500 | 0.54078700  | -0.76044800 |
| C | -1.04960200 | -0.19468100 | 0.14497500  |
| H | -1.00525200 | -1.41871500 | 1.91119000  |
| H | 1.43273900  | -1.19763700 | 2.23629100  |
| H | 1.67938600  | 1.22303100  | -1.29621700 |
| H | -0.74757600 | 1.01062400  | -1.61616800 |
| C | -2.52481500 | -0.31379300 | -0.01318000 |
| H | -2.77289900 | -0.81559300 | -1.19472400 |
| C | -3.45740200 | 0.86418100  | 0.24021300  |
| H | -3.45614100 | 0.97116000  | 1.33528700  |
| C | -4.88378200 | 0.55157400  | -0.21327800 |
| H | -5.23502500 | -0.39696000 | 0.19283300  |
| H | -5.55597800 | 1.34411500  | 0.11995400  |
| H | -4.93179300 | 0.50137400  | -1.30483000 |
| C | -2.96598700 | 2.17205300  | -0.37534000 |
| H | -1.98903300 | 2.46991200  | 0.00660800  |
| H | -2.90652800 | 2.09020400  | -1.46464400 |
| H | -3.67755900 | 2.96556400  | -0.14011900 |
| C | 3.22062500  | 0.19561300  | 0.70961900  |

|   |             |             |             |
|---|-------------|-------------|-------------|
| H | 3.51901900  | -0.45539200 | 1.53472400  |
| C | 3.60626300  | 1.64250900  | 1.01368300  |
| H | 3.08569000  | 1.97742600  | 1.91161800  |
| H | 4.68153900  | 1.72898200  | 1.17667500  |
| H | 3.33114400  | 2.29718400  | 0.18554300  |
| C | 3.93266200  | -0.31021800 | -0.52979200 |
| O | 4.44325900  | 0.38262900  | -1.37199100 |
| O | 3.90734500  | -1.64738300 | -0.60862400 |
| H | 4.33761300  | -1.91771500 | -1.43314100 |
| O | -3.25427200 | -1.99497800 | -0.85410700 |
| O | -3.03543500 | -1.51593200 | 0.50091800  |

TS10-H<sub>2</sub>O

|   |             |             |             |
|---|-------------|-------------|-------------|
| C | -0.41652127 | -0.84141483 | 1.20893274  |
| C | 0.95679006  | -0.71860774 | 1.38768640  |
| C | 1.72345479  | 0.03714759  | 0.50354054  |
| C | 1.09123638  | 0.66630208  | -0.57287865 |
| C | -0.27886159 | 0.55214288  | -0.75261562 |
| C | -1.04960200 | -0.19468100 | 0.14497500  |
| H | -1.00208668 | -1.43895406 | 1.89690777  |
| H | 1.43593430  | -1.21861292 | 2.22228405  |
| H | 1.67628393  | 1.24295255  | -1.28228562 |
| H | -0.75071391 | 1.03123610  | -1.60242240 |
| C | -2.52481500 | -0.31379300 | -0.01318000 |
| H | -2.40850335 | -0.56935967 | -1.30910950 |
| C | -3.45740200 | 0.86418100  | 0.24021300  |
| H | -3.45614100 | 0.97116000  | 1.33528700  |
| C | -4.88378200 | 0.55157400  | -0.21327800 |
| H | -5.23502500 | -0.39696000 | 0.19283300  |
| H | -5.55597800 | 1.34411500  | 0.11995400  |
| H | -4.93179300 | 0.50137400  | -1.30483000 |
| C | -2.96598700 | 2.17205300  | -0.37534000 |

|   |             |             |             |
|---|-------------|-------------|-------------|
| H | -1.98903300 | 2.46991200  | 0.00660800  |
| H | -2.90652800 | 2.09020400  | -1.46464400 |
| H | -3.67755900 | 2.96556400  | -0.14011900 |
| C | 3.22066925  | 0.19437733  | 0.71013689  |
| H | 3.51101237  | -0.42221418 | 1.56404586  |
| C | 3.61414454  | 1.65063842  | 0.95336615  |
| H | 3.09152507  | 2.02725483  | 1.83341267  |
| H | 4.68917679  | 1.73740146  | 1.11780547  |
| H | 3.34711344  | 2.27062098  | 0.09638209  |
| C | 3.93525202  | -0.36892913 | -0.50273515 |
| O | 4.45422275  | 0.28370885  | -1.37151503 |
| O | 3.90173382  | -1.70806859 | -0.52389462 |
| H | 4.33412094  | -2.01642989 | -1.33382852 |
| O | -3.40715554 | -2.53885316 | -0.73084445 |
| O | -3.03543500 | -1.51593200 | 0.50091800  |
| O | -2.64780507 | -1.02465399 | -2.53280576 |
| H | -3.52890250 | -0.67734460 | -2.68978826 |
| H | -3.12496288 | -1.96195049 | -1.76294617 |

TS10-NH<sub>3</sub>

|   |             |             |             |
|---|-------------|-------------|-------------|
| C | -0.38310344 | -1.03309351 | 1.04158309  |
| C | 0.99056674  | -0.91710607 | 1.22212563  |
| C | 1.72446557  | 0.02423032  | 0.50384077  |
| C | 1.05895149  | 0.84806521  | -0.40862886 |
| C | -0.31170312 | 0.74081591  | -0.58837783 |
| C | -1.04960200 | -0.19468100 | 0.14497500  |
| H | -0.94298273 | -1.77456320 | 1.59836625  |
| H | 1.49578153  | -1.56805179 | 1.92722513  |
| H | 1.61833178  | 1.57355343  | -0.99071578 |
| H | -0.80949053 | 1.37465149  | -1.31281322 |
| C | -2.52481500 | -0.31379300 | -0.01318000 |
| H | -2.40850335 | -0.56935967 | -1.30910950 |

|   |             |             |             |
|---|-------------|-------------|-------------|
| C | -3.45740200 | 0.86418100  | 0.24021300  |
| H | -3.51145541 | 0.92691806  | 1.33738001  |
| C | -4.86159216 | 0.58734057  | -0.29788225 |
| H | -5.24273244 | -0.37248130 | 0.05066991  |
| H | -5.54210587 | 1.37386277  | 0.03271748  |
| H | -4.85383877 | 0.58175449  | -1.39160047 |
| C | -2.92191110 | 2.18977173  | -0.29549408 |
| H | -1.96299225 | 2.46018423  | 0.14767079  |
| H | -2.80726740 | 2.15117711  | -1.38277744 |
| H | -3.63669075 | 2.98168817  | -0.06466565 |
| C | 3.22181606  | 0.17107165  | 0.71699219  |
| H | 3.54106952  | -0.60243997 | 1.41941780  |
| C | 3.58987455  | 1.55395988  | 1.25255986  |
| H | 3.07658031  | 1.72663380  | 2.19922012  |
| H | 4.66584973  | 1.63049504  | 1.41590683  |
| H | 3.29379533  | 2.33198834  | 0.54749640  |
| C | 3.92445844  | -0.11031942 | -0.59682440 |
| O | 4.41317400  | 0.72102370  | -1.31798399 |
| O | 3.91806228  | -1.41619283 | -0.89602233 |
| H | 4.34110038  | -1.53887750 | -1.75859144 |
| O | -3.40715554 | -2.53885316 | -0.73084445 |
| O | -3.03543500 | -1.51593200 | 0.50091800  |
| H | -3.52890250 | -0.67734460 | -2.68978826 |
| H | -3.12496288 | -1.96195049 | -1.76294617 |
| N | -2.61109268 | -1.03912521 | -2.52626482 |
| H | -1.89166371 | -1.09582760 | -3.38760592 |

TS10-CH<sub>3</sub>OH

|   |             |             |             |
|---|-------------|-------------|-------------|
| C | -0.46291529 | -0.49070282 | 1.37754618  |
| C | 0.91021816  | -0.35855383 | 1.55092329  |
| C | 1.72253049  | 0.05609302  | 0.49789361  |
| C | 1.13628745  | 0.33148174  | -0.74093402 |

|   |             |             |             |
|---|-------------|-------------|-------------|
| C | -0.23328782 | 0.20712778  | -0.91786858 |
| C | -1.04960200 | -0.19468100 | 0.14497500  |
| H | -1.08436955 | -0.82265467 | 2.20025646  |
| H | 1.35326311  | -0.58331011 | 2.51494269  |
| H | 1.75686024  | 0.63686936  | -1.57741024 |
| H | -0.66953694 | 0.40703165  | -1.88950207 |
| C | -2.52481500 | -0.31379300 | -0.01318000 |
| H | -2.40850335 | -0.56935967 | -1.30910950 |
| C | -3.45740200 | 0.86418100  | 0.24021300  |
| H | -3.57149787 | 0.88001249  | 1.33445459  |
| C | -4.83248799 | 0.62929601  | -0.38580991 |
| H | -5.24256543 | -0.33966581 | -0.10126815 |
| H | -5.52185384 | 1.40957902  | -0.05878482 |
| H | -4.76420034 | 0.67101259  | -1.47663868 |
| C | -2.87895057 | 2.20463017  | -0.20645615 |
| H | -1.94323454 | 2.44302736  | 0.30014594  |
| H | -2.70465130 | 2.21169614  | -1.28645045 |
| H | -3.59694164 | 2.99507350  | 0.01940111  |
| C | 3.22020250  | 0.22600211  | 0.69067287  |
| H | 3.46981029  | -0.09761000 | 1.70389343  |
| C | 3.66370790  | 1.67216923  | 0.47484133  |
| H | 3.13826404  | 2.32284363  | 1.17483025  |
| H | 4.73775530  | 1.77447193  | 0.63676350  |
| H | 3.43758083  | 1.99733355  | -0.54164299 |
| C | 3.93700380  | -0.71255296 | -0.26028011 |
| O | 4.49763022  | -0.38348641 | -1.27391646 |
| O | 3.85312827  | -1.98818885 | 0.14044878  |
| H | 4.28961082  | -2.54930751 | -0.51732555 |
| O | -3.40715554 | -2.53885316 | -0.73084445 |
| O | -3.03543500 | -1.51593200 | 0.50091800  |
| O | -2.64780507 | -1.02465399 | -2.53280576 |
| H | -3.12496288 | -1.96195049 | -1.76294617 |
| C | -3.70224398 | -0.97039870 | -3.49723043 |

|   |             |             |             |
|---|-------------|-------------|-------------|
| H | -4.44555374 | -0.27184829 | -3.17409279 |
| H | -3.30646357 | -0.65888335 | -4.44127283 |
| H | -4.14370007 | -1.93986789 | -3.59795781 |

TS10-C<sub>2</sub>H<sub>5</sub>OH

|   |             |             |             |
|---|-------------|-------------|-------------|
| C | -0.45581474 | -0.55224943 | 1.35766764  |
| C | 0.91731614  | -0.42151850 | 1.53213676  |
| C | 1.72262740  | 0.05309927  | 0.49924441  |
| C | 1.12937105  | 0.39039838  | -0.72079246 |
| C | -0.24026096 | 0.26766069  | -0.89841508 |
| C | -1.04960200 | -0.19468100 | 0.14497500  |
| H | -1.07175496 | -0.93096742 | 2.16416621  |
| H | 1.36587726  | -0.69451304 | 2.48103323  |
| H | 1.74451685  | 0.74331496  | -1.54244335 |
| H | -0.68192166 | 0.51628146  | -1.85626163 |
| C | -2.52481500 | -0.31379300 | -0.01318000 |
| H | -2.40850335 | -0.56935967 | -1.30910950 |
| C | -3.39153143 | 0.90952580  | 0.25856071  |
| H | -3.48883597 | 0.92604108  | 1.35441299  |
| C | -4.78581790 | 0.74888568  | -0.34814938 |
| H | -5.24126051 | -0.19895903 | -0.06148415 |
| H | -5.42914858 | 1.56214722  | -0.00793833 |
| H | -4.73123276 | 0.79218900  | -1.43968782 |
| C | -2.75110474 | 2.22043736  | -0.19120357 |
| H | -1.79709925 | 2.40782515  | 0.30256026  |
| H | -2.59229456 | 2.22361437  | -1.27360234 |
| H | -3.42395604 | 3.04580202  | 0.04831184  |
| C | 3.22016925  | 0.22122993  | 0.69457714  |
| H | 3.47606726  | -0.15421123 | 1.68815899  |
| C | 3.65464600  | 1.67935706  | 0.55395406  |
| H | 3.12869280  | 2.28893148  | 1.28964773  |
| H | 4.72881397  | 1.77915675  | 0.71663672  |

|   |             |             |             |
|---|-------------|-------------|-------------|
| H | 3.42220499  | 2.05665754  | -0.44290159 |
| C | 3.93796672  | -0.66139475 | -0.30779093 |
| O | 4.49225012  | -0.27578471 | -1.30484672 |
| O | 3.86298013  | -1.95695369 | 0.02502992  |
| H | 4.29966232  | -2.47985490 | -0.66338944 |
| O | -3.40715554 | -2.53885316 | -0.73084445 |
| O | -3.03543500 | -1.51593200 | 0.50091800  |
| O | -2.64780507 | -1.02465399 | -2.53280576 |
| H | -3.12496288 | -1.96195049 | -1.76294617 |
| C | -3.66740576 | -0.99292545 | -3.53495731 |
| H | -4.42913263 | -0.29886985 | -3.24693128 |
| H | -4.09476876 | -1.96823724 | -3.63997059 |
| C | -3.05403645 | -0.55395771 | -4.87759852 |
| H | -2.29231043 | -1.24801435 | -5.16562431 |
| H | -3.81695474 | -0.53021529 | -5.62745982 |
| H | -2.62667215 | 0.42135349  | -4.77258510 |

#### TS10-HCOOH

|   |             |             |             |
|---|-------------|-------------|-------------|
| C | -0.47430464 | -0.38424995 | 1.40360858  |
| C | 0.89886222  | -0.24983788 | 1.57496971  |
| C | 1.72241882  | 0.06098754  | 0.49524896  |
| C | 1.14740243  | 0.22944164  | -0.76776059 |
| C | -0.22210469 | 0.10244017  | -0.94333692 |
| C | -1.04960200 | -0.19468100 | 0.14497500  |
| H | -1.10462435 | -0.63517824 | 2.24799101  |
| H | 1.33306782  | -0.39121575 | 2.55864415  |
| H | 1.77667023  | 0.45268606  | -1.62347585 |
| H | -0.64971037 | 0.21832013  | -1.93231200 |
| C | -2.52481500 | -0.31379300 | -0.01318000 |
| H | -2.40850335 | -0.56935967 | -1.30910950 |
| C | -3.46940867 | 0.81084850  | 0.39237342  |
| H | -3.57187730 | 0.68989049  | 1.48118125  |

|   |             |             |             |
|---|-------------|-------------|-------------|
| C | -4.84809719 | 0.63600697  | -0.24526717 |
| H | -5.24281475 | -0.36626000 | -0.07891360 |
| H | -5.54368811 | 1.36031923  | 0.18197664  |
| H | -4.79212009 | 0.81301103  | -1.32315724 |
| C | -2.91277993 | 2.20407377  | 0.10951099  |
| H | -1.97473413 | 2.39105308  | 0.63310645  |
| H | -2.75025146 | 2.34682747  | -0.96288060 |
| H | -3.63821240 | 2.95056018  | 0.43788441  |
| C | 3.22035868  | 0.23358996  | 0.68350139  |
| H | 3.45982215  | -0.00002240 | 1.72356257  |
| C | 3.67969349  | 1.65034180  | 0.34217252  |
| H | 3.15599160  | 2.36611152  | 0.97688739  |
| H | 4.75357712  | 1.75678183  | 0.50250624  |
| H | 3.46374672  | 1.88498857  | -0.70109808 |
| C | 3.93424996  | -0.79320340 | -0.17385264 |
| O | 4.50501887  | -0.56173038 | -1.20859343 |
| O | 3.83495557  | -2.02685875 | 0.33908087  |
| H | 4.27030604  | -2.64881994 | -0.26231125 |
| O | -3.40715554 | -2.53885316 | -0.73084445 |
| O | -3.01463983 | -1.57716347 | 0.35306363  |
| O | -2.76031418 | -0.93852230 | -2.79628769 |
| H | -3.12496288 | -1.96195049 | -1.76294617 |
| C | -2.96627680 | -0.57887991 | -4.07258403 |
| H | -2.25616347 | -1.07378659 | -4.70163605 |
| O | -3.81093042 | 0.19001731  | -4.54092960 |

TS10-CH<sub>3</sub>COOH

|   |             |             |             |
|---|-------------|-------------|-------------|
| C | -0.54419326 | -0.27876880 | 1.44441841  |
| C | 0.81643531  | -0.11686925 | 1.67999619  |
| C | 1.69696188  | 0.11686722  | 0.62610101  |
| C | 1.19220748  | 0.17956588  | -0.67601482 |
| C | -0.16457778 | 0.02476118  | -0.91617196 |



|   |             |             |             |
|---|-------------|-------------|-------------|
| C | -1.04960200 | -0.19468100 | 0.14497500  |
| H | -1.21903894 | -0.46924138 | 2.26998073  |
| H | 1.19600260  | -0.17599276 | 2.69418093  |
| H | 1.86680487  | 0.34154067  | -1.51072864 |
| H | -0.53710321 | 0.05812019  | -1.93325528 |
| C | -2.52481500 | -0.31379300 | -0.01318000 |
| H | -2.40850335 | -0.56935967 | -1.30910950 |
| C | -3.46940867 | 0.81084850  | 0.39237342  |
| H | -3.52623738 | 0.72580219  | 1.48789648  |
| C | -4.86975257 | 0.59517824  | -0.18248345 |
| H | -5.24214665 | -0.40619157 | 0.03337688  |
| H | -5.55859828 | 1.32396101  | 0.24807376  |
| H | -4.85978890 | 0.73596074  | -1.26709946 |
| C | -2.94589034 | 2.20117085  | 0.04044207  |
| H | -1.99054528 | 2.41895389  | 0.51890812  |
| H | -2.82873062 | 2.30939310  | -1.04186075 |
| H | -3.66885652 | 2.94831589  | 0.37273338  |
| C | 3.18099073  | 0.31947682  | 0.88234723  |
| H | 3.36354707  | 0.17078634  | 1.94921605  |
| C | 3.64990983  | 1.70980916  | 0.45600172  |
| H | 3.08725216  | 2.46765506  | 1.00238883  |
| H | 4.71251277  | 1.83980834  | 0.66632918  |
| H | 3.49100570  | 1.85952633  | -0.61284808 |
| C | 3.94786099  | -0.76389504 | 0.14939653  |
| O | 4.57397887  | -0.60839061 | -0.86738278 |
| O | 3.82772491  | -1.95444186 | 0.75191731  |
| H | 4.29973575  | -2.61708755 | 0.22642260  |
| O | -3.40715554 | -2.53885316 | -0.73084445 |
| O | -3.01463983 | -1.57716347 | 0.35306363  |
| O | -2.72215157 | -0.83545043 | -2.65979535 |
| H | -3.12496288 | -1.96195049 | -1.76294617 |
| C | -2.92655858 | -0.47393188 | -3.93581169 |
| O | -3.76991485 | 0.29653003  | -4.40392375 |

|   |             |             |             |
|---|-------------|-------------|-------------|
| C | -1.88747032 | -1.19811449 | -4.85628529 |
| H | -0.89659399 | -0.92193395 | -4.56168659 |
| H | -2.00524415 | -2.25746710 | -4.76246964 |
| H | -2.05045982 | -0.90984887 | -5.87375143 |

TS11

|   |             |             |             |
|---|-------------|-------------|-------------|
| C | 0.62993948  | 1.65604624  | 0.48132481  |
| C | -0.74289492 | 1.57577164  | 0.66886663  |
| C | -1.42410161 | 0.38874179  | 0.39976349  |
| C | -0.70391765 | -0.71609683 | -0.05742505 |
| C | 0.67224132  | -0.64252261 | -0.23023126 |
| C | 1.35517800  | 0.54763600  | 0.03595900  |
| H | 1.15724445  | 2.58027602  | 0.68385810  |
| H | -1.29109021 | 2.44058475  | 1.02588550  |
| H | -1.22061734 | -1.64373145 | -0.28235644 |
| H | 1.19674817  | -1.51503508 | -0.59374942 |
| C | 2.83480000  | 0.71763500  | -0.15836000 |
| C | 3.81410900  | -0.42531358 | 0.07951106  |
| H | 4.77088010  | 0.08925037  | 0.20079957  |
| C | 3.93580316  | -1.31281797 | -1.16951704 |
| H | 4.16659942  | -0.71382678 | -2.05251236 |
| H | 4.74739601  | -2.02819606 | -1.02153256 |
| H | 3.02548331  | -1.87985652 | -1.36923913 |
| C | 3.54618791  | -1.23364706 | 1.35278885  |
| H | 3.37319252  | -0.57900784 | 2.20993681  |
| H | 2.68819219  | -1.89914434 | 1.25560744  |
| H | 4.42060470  | -1.85007973 | 1.57141435  |
| C | -2.92261471 | 0.28465821  | 0.62894552  |
| H | -3.30219160 | 1.28585339  | 0.84567684  |
| C | -3.25696487 | -0.66701991 | 1.77680469  |
| H | -2.78223109 | -0.31452175 | 2.69314733  |
| H | -4.33518139 | -0.71630599 | 1.93496872  |

|   |             |             |             |
|---|-------------|-------------|-------------|
| H | -2.89461820 | -1.67298171 | 1.56056800  |
| C | -3.57898004 | -0.16394766 | -0.66241662 |
| O | -4.01111498 | -1.26686617 | -0.87856456 |
| O | -3.60256391 | 0.81652111  | -1.57497308 |
| H | -3.99493526 | 0.47205994  | -2.39083753 |
| O | 3.28385121  | 1.86019471  | -0.51789157 |
| O | 3.49902448  | 2.30970382  | -2.09733466 |
| H | 2.73629191  | 1.94525739  | -2.62405452 |

TS12

|   |             |             |             |
|---|-------------|-------------|-------------|
| C | 0.51987000  | -0.83698900 | -0.94234600 |
| C | -0.82471100 | -0.66265800 | -1.25430600 |
| C | -1.67076100 | 0.03763800  | -0.39656000 |
| C | -1.15095700 | 0.55020900  | 0.79389100  |
| C | 0.18661300  | 0.36272600  | 1.11705800  |
| C | 1.03453000  | -0.32637800 | 0.24883500  |
| H | 1.16597700  | -1.37989400 | -1.62181200 |
| H | -1.21802000 | -1.07243300 | -2.17840800 |
| H | -1.79739300 | 1.08889400  | 1.47970700  |
| H | 0.57463300  | 0.75131600  | 2.05331900  |
| C | 2.48935700  | -0.44664400 | 0.59816800  |
| H | 2.62331900  | -0.48827700 | 1.68506100  |
| C | 3.39310800  | 0.68255700  | 0.04391500  |
| H | 4.37382100  | -0.16925400 | 0.08371000  |
| C | 3.61075100  | 1.85062900  | 0.96139200  |
| H | 3.88723900  | 1.53064300  | 1.96782600  |
| H | 4.38111900  | 2.51798900  | 0.57095300  |
| H | 2.68265300  | 2.43343400  | 1.03648300  |
| C | 3.19860800  | 1.01716000  | -1.41234400 |
| H | 3.12932900  | 0.11632200  | -2.02522300 |
| H | 2.27117500  | 1.58851800  | -1.54122500 |
| H | 4.02430900  | 1.63216700  | -1.77432200 |

|   |             |             |             |
|---|-------------|-------------|-------------|
| C | -3.13223500 | 0.25836200  | -0.75325700 |
| H | -3.34680400 | -0.30524400 | -1.66425800 |
| C | -3.45697400 | 1.73688600  | -0.95860800 |
| H | -2.83858000 | 2.13737300  | -1.76280700 |
| H | -4.50725900 | 1.86935500  | -1.22265600 |
| H | -3.25760600 | 2.30579200  | -0.04942500 |
| C | -3.98619800 | -0.34136100 | 0.34607600  |
| O | -4.55310100 | 0.28109900  | 1.20747900  |
| O | -4.02022100 | -1.67918200 | 0.27781500  |
| H | -4.53878100 | -2.01489600 | 1.02381900  |
| O | 4.41881700  | -1.46144500 | 0.20327800  |
| O | 3.04511200  | -1.61980000 | 0.00989700  |

#### TS12-H<sub>2</sub>O

|   |             |             |             |
|---|-------------|-------------|-------------|
| C | 0.52956256  | -0.78855335 | -0.96603640 |
| C | -0.81574104 | -0.61477800 | -1.27517836 |
| C | -1.67229724 | 0.03730073  | -0.39027831 |
| C | -1.16220485 | 0.50152162  | 0.82397188  |
| C | 0.17619197  | 0.31403112  | 1.14369294  |
| C | 1.03453000  | -0.32637800 | 0.24883500  |
| H | 1.18386533  | -1.29353265 | -1.66657757 |
| H | -1.20138310 | -0.98689920 | -2.21824678 |
| H | -1.81681284 | 1.00199729  | 1.53066638  |
| H | 0.55673292  | 0.66438841  | 2.09793856  |
| C | 2.48935700  | -0.44664400 | 0.59816800  |
| H | 2.62331900  | -0.48827700 | 1.68506100  |
| C | 3.39310800  | 0.68255700  | 0.04391500  |
| H | 4.47148164  | -0.00724197 | 0.10021004  |
| C | 3.75735548  | 1.76251395  | 1.02092139  |
| H | 4.11180860  | 1.35093036  | 1.96786805  |
| H | 4.52032331  | 2.42453018  | 0.60752879  |
| H | 2.87198604  | 2.37766379  | 1.23158191  |

|   |             |             |             |
|---|-------------|-------------|-------------|
| C | 3.07795610  | 1.14119520  | -1.35637425 |
| H | 2.90407377  | 0.29637725  | -2.02568501 |
| H | 2.17317849  | 1.76128849  | -1.34902368 |
| H | 3.89594639  | 1.74636021  | -1.75097662 |
| C | -3.13483428 | 0.25817714  | -0.74249571 |
| H | -3.34012575 | -0.26629100 | -1.67865968 |
| C | -3.47486851 | 1.74086838  | -0.88271376 |
| H | -2.85807148 | 2.18357385  | -1.66572736 |
| H | -4.52560727 | 1.87382017  | -1.14470585 |
| H | -3.28482822 | 2.27055012  | 0.05181142  |
| C | -3.98604717 | -0.39929470 | 0.32550285  |
| O | -4.56264337 | 0.17784640  | 1.21167189  |
| O | -4.00532962 | -1.73299890 | 0.19727085  |
| H | -4.52279977 | -2.10732631 | 0.92544251  |
| O | 3.48860444  | -2.65957417 | -0.06967464 |
| O | 2.45919146  | -1.86206007 | 0.43412902  |
| O | 5.34888910  | -0.92129671 | 0.44387257  |
| H | 6.04613076  | -1.09219091 | -0.19350428 |
| H | 4.38483947  | -1.74169006 | 0.25288801  |

### TS12-NH<sub>3</sub>

|   |             |             |             |
|---|-------------|-------------|-------------|
| C | 0.52419296  | -0.81579694 | -0.95305347 |
| C | -0.82070580 | -0.64169419 | -1.26376873 |
| C | -1.67143529 | 0.03752617  | -0.39379037 |
| C | -1.15596247 | 0.52894341  | 0.80741555  |
| C | 0.18197016  | 0.34143698  | 1.12906429  |
| C | 1.03453000  | -0.32637800 | 0.24883500  |
| H | 1.17395084  | -1.34212306 | -1.64201620 |
| H | -1.21059626 | -1.03499772 | -2.19643683 |
| H | -1.80603934 | 1.05092347  | 1.50264322  |
| H | 0.56665317  | 0.71329484  | 2.07346202  |
| C | 2.48935700  | -0.44664400 | 0.59816800  |

|   |             |             |             |
|---|-------------|-------------|-------------|
| H | 2.62331900  | -0.48827700 | 1.68506100  |
| C | 3.39310800  | 0.68255700  | 0.04391500  |
| H | 4.47148164  | -0.00724197 | 0.10021004  |
| C | 3.70827982  | 1.79320295  | 1.00342374  |
| H | 4.03786250  | 1.41206963  | 1.97185478  |
| H | 4.47399368  | 2.45676261  | 0.59765323  |
| H | 2.80701391  | 2.39897047  | 1.16904891  |
| C | 3.11692970  | 1.09966749  | -1.37743087 |
| H | 2.97825129  | 0.23511641  | -2.02954209 |
| H | 2.20285633  | 1.70481031  | -1.41569692 |
| H | 3.93789860  | 1.70779057  | -1.76114981 |
| C | -3.13337531 | 0.25834345  | -0.74851448 |
| H | -3.34381717 | -0.28817372 | -1.67082007 |
| C | -3.46481654 | 1.73908310  | -0.92519066 |
| H | -2.84706034 | 2.15828632  | -1.72029000 |
| H | -4.51529985 | 1.87177672  | -1.18833550 |
| H | -3.26959781 | 2.29086327  | -0.00462363 |
| C | -3.98621778 | -0.36699443 | 0.33733348  |
| O | -4.55743940 | 0.23565238  | 1.20990055  |
| O | -4.01376954 | -1.70335274 | 0.24262598  |
| H | -4.53190881 | -2.05617575 | 0.98098765  |
| O | 3.48860444  | -2.65957417 | -0.06967464 |
| O | 2.45919146  | -1.86206007 | 0.43412902  |
| H | 6.11100828  | -1.07665387 | -0.19362661 |
| H | 4.38483947  | -1.74169006 | 0.25288801  |
| N | 5.37716144  | -0.89678773 | 0.47721252  |
| H | 5.43896062  | -0.96436970 | 1.53887014  |

TS12-CH<sub>3</sub>OH

|   |             |             |             |
|---|-------------|-------------|-------------|
| C | 0.51441614  | -0.86284316 | -0.92853384 |
| C | -0.82977371 | -0.68826628 | -1.24203815 |
| C | -1.66993369 | 0.03769623  | -0.39998534 |

|   |             |             |             |
|---|-------------|-------------|-------------|
| C | -1.14466603 | 0.57607272  | 0.77659591  |
| C | 0.19245966  | 0.38866243  | 1.10163830  |
| C | 1.03453000  | -0.32637800 | 0.24883500  |
| H | 1.15592683  | -1.42594201 | -1.59581030 |
| H | -1.22739344 | -1.11812932 | -2.15510351 |
| H | -1.78651706 | 1.13510965  | 1.45032405  |
| H | 0.58469235  | 0.79767467  | 2.02738604  |
| C | 2.48935700  | -0.44664400 | 0.59816800  |
| H | 2.62331900  | -0.48827700 | 1.68506100  |
| C | 3.39310800  | 0.68255700  | 0.04391500  |
| H | 4.47148164  | -0.00724197 | 0.10021004  |
| C | 3.81618614  | 1.72415630  | 1.03870167  |
| H | 4.19883793  | 1.27634841  | 1.95782719  |
| H | 4.57550854  | 2.38464504  | 0.61625291  |
| H | 2.95196819  | 2.34865294  | 1.30289388  |
| C | 3.03309577  | 1.19098687  | -1.32807988 |
| H | 2.81676451  | 0.37111401  | -2.01578520 |
| H | 2.14171309  | 1.82720908  | -1.26602782 |
| H | 3.84699267  | 1.79304841  | -1.73567967 |
| C | -3.13083717 | 0.25824818  | -0.75911756 |
| H | -3.35058998 | -0.32612909 | -1.65568117 |
| C | -3.44737735 | 1.73321019  | -0.99983955 |
| H | -2.82833860 | 2.11032858  | -1.81476884 |
| H | -4.49742094 | 1.86537584  | -1.26499737 |
| H | -3.24279815 | 2.32293085  | -0.10519310 |
| C | -3.98598610 | -0.30946300 | 0.35617516  |
| O | -4.54745067 | 0.33713572  | 1.20323964  |
| O | -4.02795172 | -1.64832735 | 0.32063267  |
| H | -4.54690217 | -1.96269895 | 1.07561033  |
| O | 3.48860444  | -2.65957417 | -0.06967464 |
| O | 2.45919146  | -1.86206007 | 0.43412902  |
| O | 5.35495114  | -0.99369277 | 0.52470145  |
| H | 4.38483947  | -1.74169006 | 0.25288801  |

|   |            |             |             |
|---|------------|-------------|-------------|
| C | 6.39355069 | -1.24825392 | -0.42472448 |
| H | 7.29569538 | -0.77130247 | -0.10292909 |
| H | 6.55567450 | -2.30309176 | -0.50175042 |
| H | 6.10641578 | -0.86084325 | -1.37990326 |

TS12-C<sub>2</sub>H<sub>5</sub>OH

|   |             |             |             |
|---|-------------|-------------|-------------|
| C | 0.55027626  | -0.67226302 | -1.01226474 |
| C | -0.79671263 | -0.50028463 | -1.31500678 |
| C | -1.67591913 | 0.03537896  | -0.37585624 |
| C | -1.18658951 | 0.38348751  | 0.88488789  |
| C | 0.15376537  | 0.19660612  | 1.19666411  |
| C | 1.03453000  | -0.32637800 | 0.24883500  |
| H | 1.22223388  | -1.08572647 | -1.75482456 |
| H | -1.16593945 | -0.78190200 | -2.29527983 |
| H | -1.85878295 | 0.79182734  | 1.63309857  |
| H | 0.51836269  | 0.45529963  | 2.18575098  |
| C | 2.48935700  | -0.44664400 | 0.59816800  |
| H | 2.62331900  | -0.48827700 | 1.68506100  |
| C | 3.39310800  | 0.68255700  | 0.04391500  |
| H | 4.47148164  | -0.00724197 | 0.10021004  |
| C | 3.88521034  | 1.67696585  | 1.05510788  |
| H | 4.29869475  | 1.18704563  | 1.93871121  |
| H | 4.63976279  | 2.33611235  | 0.62214675  |
| H | 3.04872976  | 2.30977931  | 1.38147211  |
| C | 2.98305590  | 1.24941889  | -1.29062783 |
| H | 2.71657576  | 0.46061106  | -1.99681467 |
| H | 2.11052778  | 1.90206456  | -1.16437185 |
| H | 3.79142142  | 1.84845623  | -1.71340827 |
| C | -3.14098025 | 0.25579339  | -0.71772097 |
| H | -3.32611146 | -0.17361326 | -1.70511692 |
| C | -3.51742244 | 1.73627832  | -0.70707455 |
| H | -2.90635569 | 2.27274169  | -1.43394556 |



|   |             |             |             |
|---|-------------|-------------|-------------|
| H | -4.56925787 | 1.86997256  | -0.96424383 |
| H | -3.34765722 | 2.17066621  | 0.27908077  |
| C | -3.98301552 | -0.52949760 | 0.26805192  |
| O | -4.58047081 | -0.06163645 | 1.20346825  |
| O | -3.96758578 | -1.84278118 | 0.00228833  |
| H | -4.48069282 | -2.30314115 | 0.68267072  |
| O | 3.48860444  | -2.65957417 | -0.06967464 |
| O | 2.45919146  | -1.86206007 | 0.43412902  |
| O | 5.35495114  | -0.99369277 | 0.52470145  |
| H | 4.38483947  | -1.74169006 | 0.25288801  |
| C | 6.31045650  | -1.34609489 | -0.47915225 |
| H | 6.43487579  | -2.40870660 | -0.49577117 |
| H | 5.96326245  | -1.01265537 | -1.43475382 |
| C | 7.66009093  | -0.67614187 | -0.16095441 |
| H | 8.00728457  | -1.00958127 | 0.79464736  |
| H | 8.37504953  | -0.93982747 | -0.91208963 |
| H | 7.53567130  | 0.38646980  | -0.14433555 |

#### TS12-HCOOH

|   |             |             |             |
|---|-------------|-------------|-------------|
| C | 0.53012922  | -0.78561589 | -0.96738500 |
| C | -0.81521779 | -0.61187807 | -1.27635909 |
| C | -1.67238985 | 0.03727107  | -0.38990281 |
| C | -1.16286531 | 0.49855946  | 0.82570262  |
| C | 0.17558143  | 0.31107369  | 1.14521741  |
| C | 1.03453000  | -0.32637800 | 0.24883500  |
| H | 1.18491230  | -1.28829132 | -1.66913330 |
| H | -1.20041137 | -0.98171487 | -2.22050881 |
| H | -1.81795206 | 0.99671457  | 1.53359207  |
| H | 0.55568546  | 0.65911338  | 2.10048474  |
| C | 2.48935700  | -0.44664400 | 0.59816800  |
| H | 2.62331900  | -0.48827700 | 1.68506100  |
| C | 3.39310800  | 0.68255700  | 0.04391500  |

|   |             |             |             |
|---|-------------|-------------|-------------|
| H | 4.47148164  | -0.00724197 | 0.10021004  |
| C | 3.92351891  | 1.64974592  | 1.06211665  |
| H | 4.35305553  | 1.13663614  | 1.92464935  |
| H | 4.67519203  | 2.30835923  | 0.62337428  |
| H | 3.10380740  | 2.28592821  | 1.42268756  |
| C | 2.95650427  | 1.28185489  | -1.26783914 |
| H | 2.66202911  | 0.51113431  | -1.98282410 |
| H | 2.09591775  | 1.94243889  | -1.10593841 |
| H | 3.76145689  | 1.87950419  | -1.69901248 |
| C | -3.13499113 | 0.25814988  | -0.74185186 |
| H | -3.33973745 | -0.26393563 | -1.67946589 |
| C | -3.47595036 | 1.74099279  | -0.87816546 |
| H | -2.85926587 | 2.18619573  | -1.65985055 |
| H | -4.52671670 | 1.87397041  | -1.14003380 |
| H | -3.28645823 | 2.26828644  | 0.05782039  |
| C | -3.98601593 | -0.40273461 | 0.32418848  |
| O | -4.56318002 | 0.17165414  | 1.21177498  |
| O | -4.00441003 | -1.73610193 | 0.19237285  |
| H | -4.52179963 | -2.11271588 | 0.91942187  |
| O | 3.48860444  | -2.65957417 | -0.06967464 |
| O | 2.45919146  | -1.86206007 | 0.43412902  |
| O | 5.55164216  | -0.94673956 | 0.09802677  |
| H | 4.38483947  | -1.74169006 | 0.25288801  |
| C | 6.87232736  | -1.22015384 | -0.37729968 |
| H | 7.57543186  | -1.06552694 | 0.41430287  |
| O | 7.25779206  | -1.57945625 | -1.48870363 |

TS12-CH<sub>3</sub>COOH

|   |             |             |             |
|---|-------------|-------------|-------------|
| C | 0.53728935  | -0.74740250 | -0.98404812 |
| C | -0.80861831 | -0.57419118 | -1.29086858 |
| C | -1.67358921 | 0.03679329  | -0.38507246 |
| C | -1.17124046 | 0.45993057  | 0.84728276  |

|   |             |             |             |
|---|-------------|-------------|-------------|
| C | 0.16785345  | 0.27255826  | 1.16414142  |
| C | 1.03453000  | -0.32637800 | 0.24883500  |
| H | 1.19815347  | -1.22006898 | -1.70079016 |
| H | -1.18814235 | -0.91430193 | -2.24839572 |
| H | -1.83238715 | 0.92786457  | 1.57000502  |
| H | 0.54244007  | 0.59045895  | 2.13201041  |
| C | 2.48935700  | -0.44664400 | 0.59816800  |
| H | 2.62331900  | -0.48827700 | 1.68506100  |
| C | 3.39310800  | 0.68255700  | 0.04391500  |
| H | 4.47148164  | -0.00724197 | 0.10021004  |
| C | 3.84548828  | 1.70441254  | 1.04625629  |
| H | 4.24152731  | 1.23867569  | 1.95068334  |
| H | 4.60285100  | 2.36427190  | 0.61932986  |
| H | 2.99265863  | 2.33279065  | 1.33692584  |
| C | 3.01150947  | 1.21579070  | -1.31274416 |
| H | 2.77393468  | 0.40886753  | -2.00870575 |
| H | 2.12771534  | 1.85931602  | -1.22343949 |
| H | 3.82315468  | 1.81648671  | -1.72679755 |
| C | -3.13702381 | 0.25763475  | -0.73356395 |
| H | -3.33485310 | -0.23336454 | -1.68928235 |
| C | -3.48999032 | 1.74144078  | -0.81954061 |
| H | -2.87492671 | 2.21850426  | -1.58350669 |
| H | -4.54111603 | 1.87471998  | -1.07980850 |
| H | -3.30745373 | 2.23757529  | 0.13468489  |
| C | -3.98538876 | -0.44674888 | 0.30642362  |
| O | -4.56974086 | 0.09179546  | 1.21160495  |
| O | -3.99228248 | -1.77486249 | 0.12852242  |
| H | -4.50847978 | -2.18066982 | 0.84055550  |
| O | 3.48860444  | -2.65957417 | -0.06967464 |
| O | 2.45919146  | -1.86206007 | 0.43412902  |
| O | 5.53516049  | -0.96840707 | 0.12073622  |
| H | 4.38483947  | -1.74169006 | 0.25288801  |
| C | 6.86407885  | -1.07226668 | -0.39703708 |

|   |            |             |             |
|---|------------|-------------|-------------|
| O | 7.25543048 | -1.33540768 | -1.53303915 |
| C | 7.87694674 | -0.79194924 | 0.72862751  |
| H | 7.71975780 | 0.19441897  | 1.11238445  |
| H | 7.74351561 | -1.50583896 | 1.51441222  |
| H | 8.87131242 | -0.86966181 | 0.34120312  |

TS13

|   |             |             |             |
|---|-------------|-------------|-------------|
| C | -0.24936800 | -1.52168800 | -0.49074000 |
| C | 1.13445500  | -1.61708300 | -0.31600600 |
| C | 1.86596600  | -0.53247800 | 0.16945900  |
| C | 1.20681800  | 0.66099100  | 0.47687400  |
| C | -0.17344200 | 0.77479800  | 0.30014300  |
| C | -0.85356100 | -0.32435000 | -0.17704300 |
| H | -0.82066800 | -2.36782600 | -0.85849800 |
| H | 1.64572600  | -2.54425800 | -0.55528100 |
| H | 1.77223800  | 1.50953400  | 0.85186900  |
| H | -0.68529300 | 1.70215100  | 0.53619900  |
| C | -3.14503700 | -0.13654500 | -0.54088400 |
| H | -2.96362000 | -0.32039800 | -1.59653200 |
| C | -3.45029200 | 1.08900100  | -0.05859100 |
| H | -4.32233600 | -2.64622200 | -0.63970100 |
| C | -3.27013200 | 2.29436100  | -0.92930600 |
| H | -2.91791900 | 2.02781000  | -1.92668600 |
| H | -4.21793600 | 2.83372800  | -1.02479400 |
| H | -2.55453400 | 2.99266400  | -0.48267300 |
| C | -3.86718800 | 1.31715500  | 1.36040100  |
| H | -4.05717400 | 0.38138600  | 1.88323300  |
| H | -3.08835100 | 1.86895600  | 1.89903900  |
| H | -4.76940700 | 1.93506800  | 1.39022100  |
| C | 3.36762500  | -0.64987400 | 0.38813900  |
| H | 3.69309800  | -1.61382200 | -0.00983800 |
| C | 3.74636700  | -0.53490900 | 1.86356100  |

|   |             |             |             |
|---|-------------|-------------|-------------|
| H | 3.24918500  | -1.32439700 | 2.42865900  |
| H | 4.82508100  | -0.63229500 | 1.99676200  |
| H | 3.43646900  | 0.43019000  | 2.26678400  |
| C | 4.05379300  | 0.42025300  | -0.43637600 |
| O | 4.50291300  | 1.45228300  | -0.00626000 |
| O | 4.08155200  | 0.10767900  | -1.73956600 |
| H | 4.48740400  | 0.84115500  | -2.22478000 |
| O | -4.60449100 | -1.84515700 | -0.17639000 |
| O | -3.34347200 | -1.27870600 | 0.22324500  |

#### TS14

|   |             |             |             |
|---|-------------|-------------|-------------|
| C | -0.49425400 | -0.30612900 | 1.16059100  |
| C | 0.86389100  | -0.14036000 | 1.40816600  |
| C | 1.73725600  | 0.20145200  | 0.37633600  |
| C | 1.22941200  | 0.35999100  | -0.91363300 |
| C | -0.12582800 | 0.17912200  | -1.16552500 |
| C | -0.99929300 | -0.14884100 | -0.13017600 |
| H | -1.16154300 | -0.56442700 | 1.97552900  |
| H | 1.24818800  | -0.27151100 | 2.41387400  |
| H | 1.89586900  | 0.61941300  | -1.73028200 |
| H | -0.50779700 | 0.29749200  | -2.17388500 |
| C | -2.47114400 | -0.30176900 | -0.39602500 |
| H | -2.67223200 | -0.30844200 | -1.47327200 |
| C | -3.33243000 | 0.79438800  | 0.28584300  |
| H | -3.07399300 | 0.77728800  | 1.34874600  |
| C | -4.79340300 | 0.47016100  | 0.12271800  |
| H | -4.73821800 | -0.85946900 | -0.02200600 |
| H | -5.43607800 | 0.63553400  | 0.98406300  |
| H | -5.23683900 | 0.76805000  | -0.82767700 |
| C | -2.98806400 | 2.16999500  | -0.30162500 |
| H | -1.94069100 | 2.41843400  | -0.11827800 |
| H | -3.16492300 | 2.17902100  | -1.38062800 |

|   |             |             |             |
|---|-------------|-------------|-------------|
| H | -3.61177900 | 2.94126500  | 0.15210900  |
| C | 3.21613100  | 0.42483300  | 0.65148900  |
| H | 3.41270300  | 0.14503300  | 1.68919200  |
| C | 3.63111500  | 1.87458200  | 0.40758900  |
| H | 3.04753100  | 2.53360700  | 1.05162600  |
| H | 4.69074800  | 2.01641100  | 0.62517000  |
| H | 3.45367400  | 2.15636500  | -0.63128400 |
| C | 4.01395100  | -0.52563200 | -0.21886500 |
| O | 4.61448300  | -0.22026400 | -1.21730600 |
| O | 3.95538200  | -1.78548500 | 0.23387700  |
| H | 4.44281600  | -2.35726300 | -0.37725000 |
| O | -4.14703300 | -1.85799000 | -0.31328200 |
| O | -2.86926700 | -1.56595600 | 0.14333100  |

#### TS14-H<sub>2</sub>O

|   |             |             |             |
|---|-------------|-------------|-------------|
| C | -0.47710073 | -0.42439473 | 1.13365498  |
| C | 0.88063899  | -0.25897752 | 1.38367615  |
| C | 1.73624117  | 0.19989659  | 0.38284925  |
| C | 1.21123163  | 0.47656360  | -0.88003653 |
| C | -0.14338846 | 0.29660716  | -1.13588557 |
| C | -0.99929300 | -0.14884100 | -0.13017600 |
| H | -1.13056932 | -0.77479190 | 1.92505691  |
| H | 1.27845327  | -0.48240211 | 2.36762665  |
| H | 1.86382952  | 0.82823384  | -1.67302098 |
| H | -0.53868178 | 0.50762328  | -2.12377072 |
| C | -2.47114400 | -0.30176900 | -0.39602500 |
| H | -2.67223200 | -0.30844200 | -1.47327200 |
| C | -3.33243000 | 0.79438800  | 0.28584300  |
| H | -3.12503715 | 0.73132708  | 1.35815658  |
| C | -4.79262889 | 0.52005206  | 0.04349196  |
| H | -5.23006193 | -0.69908714 | -0.14331189 |
| H | -5.47033041 | 0.67345079  | 0.87984360  |

|   |             |             |             |
|---|-------------|-------------|-------------|
| H | -5.18214061 | 0.86507436  | -0.91456035 |
| C | -2.92209799 | 2.17934046  | -0.23332511 |
| H | -1.87796351 | 2.38960506  | 0.00729961  |
| H | -3.04750371 | 2.23247752  | -1.31824811 |
| H | -3.54455721 | 2.95207668  | 0.21963803  |
| C | 3.21398844  | 0.42212024  | 0.66491163  |
| H | 3.42707497  | 0.04415300  | 1.66765338  |
| C | 3.60081258  | 1.89637118  | 0.56282177  |
| H | 3.01308318  | 2.47713968  | 1.27482598  |
| H | 4.66018570  | 2.03543188  | 0.78343403  |
| H | 3.40680511  | 2.27678162  | -0.44106720 |
| C | 4.01845427  | -0.42211184 | -0.30334633 |
| O | 4.60229449  | -0.00786486 | -1.27200662 |
| O | 3.98699903  | -1.72162434 | 0.02209651  |
| H | 4.47744500  | -2.22064704 | -0.64755809 |
| O | -3.22048131 | -2.77293451 | -0.25739695 |
| O | -2.37520784 | -1.68966321 | -0.06117950 |
| O | -5.57256146 | -1.88991012 | -0.31972771 |
| H | -6.06808941 | -2.03526685 | 0.48954570  |
| H | -4.51802394 | -2.58083192 | -0.15450438 |

TS14-NH<sub>3</sub>

|   |             |             |             |
|---|-------------|-------------|-------------|
| C | -0.48586169 | -0.36596179 | 1.14854610  |
| C | 0.87207560  | -0.20033823 | 1.39735478  |
| C | 1.73673385  | 0.20075353  | 0.37962862  |
| C | 1.22049087  | 0.41905795  | -0.89821977 |
| C | -0.13443029 | 0.23859699  | -1.15211175 |
| C | -0.99929300 | -0.14884100 | -0.13017600 |
| H | -1.14637943 | -0.67088740 | 1.95281787  |
| H | 1.26298875  | -0.37818167 | 2.39329250  |
| H | 1.88015733  | 0.72518420  | -1.70413985 |
| H | -0.52291594 | 0.40383029  | -2.15135073 |

|   |             |             |             |
|---|-------------|-------------|-------------|
| C | -2.47114400 | -0.30176900 | -0.39602500 |
| H | -2.66932330 | -0.33643326 | -1.47327398 |
| C | -3.32891338 | 0.81646063  | 0.25367639  |
| H | -3.12475705 | 0.78125398  | 1.32788567  |
| C | -4.78977053 | 0.54274561  | 0.01461256  |
| H | -5.23006193 | -0.69908714 | -0.14331189 |
| H | -5.46899207 | 0.72183770  | 0.84459973  |
| H | -5.17497504 | 0.86375776  | -0.95347457 |
| C | -2.91039595 | 2.18496148  | -0.30134592 |
| H | -1.86590545 | 2.39658699  | -0.06347516 |
| H | -3.03258061 | 2.20951400  | -1.38765902 |
| H | -3.53030029 | 2.97258623  | 0.12890777  |
| C | 3.21503032  | 0.42364139  | 0.65826830  |
| H | 3.41972918  | 0.09401448  | 1.67964022  |
| C | 3.61572836  | 1.88754082  | 0.48532141  |
| H | 3.02979589  | 2.50807930  | 1.16449961  |
| H | 4.67522054  | 2.02801645  | 0.70446056  |
| H | 3.43013539  | 2.21938249  | -0.53721486 |
| C | 4.01655769  | -0.47465092 | -0.26262331 |
| O | 4.60890457  | -0.11413489 | -1.24747158 |
| O | 3.97169579  | -1.75609149 | 0.12664867  |
| H | 4.46088379  | -2.29202842 | -0.51480662 |
| O | -3.23293774 | -2.76467559 | -0.19318386 |
| O | -2.38291285 | -1.68060503 | -0.02373200 |
| H | -6.15098644 | -2.03165247 | 0.48305824  |
| H | -4.51802394 | -2.58083192 | -0.15450438 |
| N | -5.63481149 | -1.88023920 | -0.35993490 |
| H | -6.12943333 | -2.17944524 | -1.29379135 |

TS14-CH<sub>3</sub>OH

|   |             |             |            |
|---|-------------|-------------|------------|
| C | -0.50016673 | -0.26132664 | 1.16755406 |
| C | 0.85813729  | -0.09549100 | 1.41421034 |



|   |             |             |             |
|---|-------------|-------------|-------------|
| C | 1.73765832  | 0.20186010  | 0.37387381  |
| C | 1.23573266  | 0.31564420  | -0.92311653 |
| C | -0.11975288 | 0.13453935  | -1.17351350 |
| C | -0.99929300 | -0.14884100 | -0.13017600 |
| H | -1.17223919 | -0.48466738 | 1.98886637  |
| H | 1.23776922  | -0.19166664 | 2.42562677  |
| H | 1.90698718  | 0.54004998  | -1.74618379 |
| H | -0.49713378 | 0.21782892  | -2.18709536 |
| C | -2.47114400 | -0.30176900 | -0.39602500 |
| H | -2.66697156 | -0.36009557 | -1.47268260 |
| C | -3.32578839 | 0.83442337  | 0.22604217  |
| H | -3.12426542 | 0.82280421  | 1.30126233  |
| C | -4.78720654 | 0.56130440  | -0.01025858 |
| H | -5.23006193 | -0.69908714 | -0.14331189 |
| H | -5.46760129 | 0.76197847  | 0.81380906  |
| H | -5.16884072 | 0.86180250  | -0.98631198 |
| C | -2.90033888 | 2.18824090  | -0.35891253 |
| H | -1.85553640 | 2.40095724  | -0.12339650 |
| H | -3.01990708 | 2.18859954  | -1.44579403 |
| H | -3.51797863 | 2.98796004  | 0.05184626  |
| C | 3.21697691  | 0.42549034  | 0.64642760  |
| H | 3.40775998  | 0.18321124  | 1.69459685  |
| C | 3.64270930  | 1.86236414  | 0.35042640  |
| H | 3.06121022  | 2.54877208  | 0.96716854  |
| H | 4.70245988  | 2.00514527  | 0.56680872  |
| H | 3.47107449  | 2.10645406  | -0.69890942 |
| C | 4.01157244  | -0.56199818 | -0.18477689 |
| O | 4.61789620  | -0.29800800 | -1.19148113 |
| O | 3.94275301  | -1.80370766 | 0.31427887  |
| H | 4.42857453  | -2.40106662 | -0.27320552 |
| O | -3.24357139 | -2.75630410 | -0.13912716 |
| O | -2.38947047 | -1.67213720 | 0.00770266  |
| O | -5.55075318 | -1.83900069 | -0.32308669 |

|   |             |             |             |
|---|-------------|-------------|-------------|
| H | -4.51802394 | -2.58083192 | -0.15450438 |
| C | -6.49350473 | -2.18654653 | 0.69442566  |
| H | -5.97085296 | -2.53015452 | 1.56256659  |
| H | -7.07852541 | -1.32704306 | 0.94721924  |
| H | -7.13655106 | -2.96249372 | 0.33484620  |

TS14-C<sub>2</sub>H<sub>5</sub>OH

|   |             |             |             |
|---|-------------|-------------|-------------|
| C | -0.50761234 | -0.20121562 | 1.17419756  |
| C | 0.85090960  | -0.03534606 | 1.41962783  |
| C | 1.73821300  | 0.20225681  | 0.37057465  |
| C | 1.24374125  | 0.25598965  | -0.93313951 |
| C | -0.11208262 | 0.07465983  | -1.18153393 |
| C | -0.99929300 | -0.14884100 | -0.13017600 |
| H | -1.18572629 | -0.37759824 | 2.00194573  |
| H | 1.22466185  | -0.08457921 | 2.43659327  |
| H | 1.92105563  | 0.43335612  | -1.76269762 |
| H | -0.48369033 | 0.11089599  | -2.20001139 |
| C | -2.47114400 | -0.30176900 | -0.39602500 |
| H | -2.66697156 | -0.36009557 | -1.47268260 |
| C | -3.32578839 | 0.83442337  | 0.22604217  |
| H | -3.09114594 | 0.85144575  | 1.29445130  |
| C | -4.78883637 | 0.53163671  | 0.04168963  |
| H | -5.23006193 | -0.69908714 | -0.14331189 |
| H | -5.44695294 | 0.74033872  | 0.88170191  |
| H | -5.20542620 | 0.80272157  | -0.92866592 |
| C | -2.94199305 | 2.18096928  | -0.40285881 |
| H | -1.89428114 | 2.41645493  | -0.20493324 |
| H | -3.09489534 | 2.15377500  | -1.48521247 |
| H | -3.56045529 | 2.97978442  | 0.00842112  |
| C | 3.21814036  | 0.42606392  | 0.63965629  |
| H | 3.40154554  | 0.23440315  | 1.69955478  |
| C | 3.65836095  | 1.84267117  | 0.27510062  |

|   |             |             |             |
|---|-------------|-------------|-------------|
| H | 3.08008763  | 2.56393440  | 0.85393327  |
| H | 4.71828521  | 1.98664934  | 0.48983274  |
| H | 3.49412521  | 2.03591356  | -0.78594984 |
| C | 4.00782109  | -0.60841715 | -0.13730562 |
| O | 4.62147299  | -0.40005273 | -1.15258310 |
| O | 3.92526621  | -1.82318614 | 0.42229797  |
| H | 4.40853172  | -2.45321753 | -0.13224066 |
| O | -3.24357139 | -2.75630410 | -0.13912716 |
| O | -2.38947047 | -1.67213720 | 0.00770266  |
| O | -5.71526705 | -2.01648847 | -0.35133783 |
| H | -4.51802394 | -2.58083192 | -0.15450438 |
| C | -6.65801860 | -2.36403431 | 0.66617452  |
| H | -6.13536683 | -2.70764230 | 1.53431545  |
| H | -7.24303928 | -1.50453084 | 0.91896810  |
| C | -7.58352453 | -3.48081811 | 0.14864894  |
| H | -8.28748072 | -3.74245295 | 0.91081224  |
| H | -8.10787330 | -3.13642267 | -0.71815562 |
| H | -6.99826559 | -4.33952561 | -0.10628911 |

#### TS14-HCOOH

|   |             |             |             |
|---|-------------|-------------|-------------|
| C | -0.49216154 | -0.32143607 | 1.15781157  |
| C | 0.86592981  | -0.15569806 | 1.40570144  |
| C | 1.73712075  | 0.20129019  | 0.37717787  |
| C | 1.22718251  | 0.37511946  | -0.90999209 |
| C | -0.12797494 | 0.19434461  | -1.16239538 |
| C | -0.99929300 | -0.14884100 | -0.13017600 |
| H | -1.15776037 | -0.59166913 | 1.97025768  |
| H | 1.25187697  | -0.29879625 | 2.40914604  |
| H | 1.89194446  | 0.64649636  | -1.72413362 |
| H | -0.51156827 | 0.32470214  | -2.16865814 |
| C | -2.47114400 | -0.30176900 | -0.39602500 |
| H | -2.66331934 | -0.39899022 | -1.47052892 |

|   |             |             |             |
|---|-------------|-------------|-------------|
| C | -3.32034841 | 0.86256218  | 0.17973750  |
| H | -3.12294958 | 0.88979636  | 1.25544049  |
| C | -4.78269777 | 0.59056471  | -0.05205284 |
| H | -5.23006193 | -0.69908714 | -0.14331189 |
| H | -5.46479834 | 0.82643938  | 0.76121004  |
| H | -5.15860421 | 0.85691040  | -1.04017141 |
| C | -2.88347934 | 2.19069801  | -0.45366744 |
| H | -1.83814212 | 2.40508862  | -0.22207507 |
| H | -2.99895889 | 2.15122838  | -1.54027440 |
| H | -3.49718787 | 3.00931779  | -0.07554598 |
| C | 3.21584623  | 0.42456266  | 0.65322117  |
| H | 3.41445378  | 0.13198443  | 1.68700506  |
| C | 3.62716793  | 1.87826661  | 0.42732214  |
| H | 3.04293517  | 2.52765645  | 1.08049350  |
| H | 4.68676312  | 2.01975838  | 0.64530646  |
| H | 3.44768516  | 2.17288693  | -0.60763142 |
| C | 4.01468055  | -0.51285507 | -0.23025394 |
| O | 4.61316808  | -0.19336627 | -1.22549879 |
| O | 3.95961629  | -1.77852152 | 0.20642853  |
| H | 4.44754295  | -2.34131486 | -0.41259442 |
| O | -3.26125687 | -2.73977440 | -0.05072157 |
| O | -2.40033759 | -1.65660342 | 0.05893184  |
| O | -5.69265900 | -1.95391287 | 0.07293994  |
| H | -4.51802394 | -2.58083192 | -0.15450438 |
| C | -6.71958381 | -2.36363840 | 0.97983045  |
| H | -6.40141069 | -2.18108922 | 1.98498797  |
| O | -7.85004533 | -2.86625468 | 0.78505010  |

TS14-CH<sub>3</sub>COOH

|   |             |             |            |
|---|-------------|-------------|------------|
| C | -0.48669428 | -0.36020481 | 1.14984402 |
| C | 0.87126275  | -0.19456439 | 1.39853365 |
| C | 1.73678332  | 0.20082851  | 0.37931160 |

|   |             |             |             |
|---|-------------|-------------|-------------|
| C | 1.22137355  | 0.41338262  | -0.89984189 |
| C | -0.13357785 | 0.23287769  | -1.15354127 |
| C | -0.99929300 | -0.14884100 | -0.13017600 |
| H | -1.14788293 | -0.66064690 | 1.95525107  |
| H | 1.26151978  | -0.36791603 | 2.39552013  |
| H | 1.88171279  | 0.71501808  | -1.70690350 |
| H | -0.52141676 | 0.39360119  | -2.15376655 |
| C | -2.47114400 | -0.30176900 | -0.39602500 |
| H | -2.66331934 | -0.39899022 | -1.47052892 |
| C | -3.32034841 | 0.86256218  | 0.17973750  |
| H | -3.08081953 | 0.92551891  | 1.24533934  |
| C | -4.78490858 | 0.55567466  | 0.01524252  |
| H | -5.23006193 | -0.69908714 | -0.14331189 |
| H | -5.43872462 | 0.80240208  | 0.84827597  |
| H | -5.20527682 | 0.78527430  | -0.96414430 |
| C | -2.93632609 | 2.17947947  | -0.50892563 |
| H | -1.88718931 | 2.42075465  | -0.32609632 |
| H | -3.09420249 | 2.10554979  | -1.58837804 |
| H | -3.55108182 | 2.99698615  | -0.13009776 |
| C | 3.21513476  | 0.42377192  | 0.65761501  |
| H | 3.41903163  | 0.09892500  | 1.68067740  |
| C | 3.61720391  | 1.88646391  | 0.47777166  |
| H | 3.03147534  | 2.51080253  | 1.15363499  |
| H | 4.67670882  | 2.02707390  | 0.69676306  |
| H | 3.43241544  | 2.21350321  | -0.54645614 |
| C | 4.01633573  | -0.47967843 | -0.25850235 |
| O | 4.60949295  | -0.12446300 | -1.24478793 |
| O | 3.97015405  | -1.75917566 | 0.13695851  |
| H | 4.45919351  | -2.29864609 | -0.50164171 |
| O | -3.26125687 | -2.73977440 | -0.05072157 |
| O | -2.40033759 | -1.65660342 | 0.05893184  |
| O | -5.70077434 | -1.93455133 | 0.11406705  |
| H | -4.51802394 | -2.58083192 | -0.15450438 |

|   |             |             |            |
|---|-------------|-------------|------------|
| C | -6.72665060 | -2.34666944 | 1.02106018 |
| O | -7.70533873 | -3.11479126 | 0.87730982 |
| C | -6.50286946 | -1.67502770 | 2.38869294 |
| H | -5.65603742 | -1.02346438 | 2.33176539 |
| H | -7.37115848 | -1.10902226 | 2.65442217 |
| H | -6.32592825 | -2.42593651 | 3.13012922 |

TS15

|   |             |             |             |
|---|-------------|-------------|-------------|
| C | -0.43485500 | -0.74480100 | 1.00430100  |
| C | 0.90362700  | -0.51458700 | 1.30111600  |
| C | 1.75017200  | 0.09242400  | 0.37506400  |
| C | 1.22987300  | 0.46206400  | -0.87061500 |
| C | -0.09940700 | 0.22826300  | -1.18052600 |
| C | -0.95443000 | -0.38181400 | -0.24688100 |
| H | -1.08168800 | -1.20666600 | 1.74013600  |
| H | 1.29329200  | -0.80670600 | 2.27060600  |
| H | 1.87612100  | 0.92978000  | -1.60714000 |
| H | -0.48645800 | 0.51493300  | -2.15284900 |
| C | -2.35955500 | -0.54083100 | -0.56390900 |
| H | -2.67806300 | -0.50158800 | -1.60353100 |
| C | -3.23859500 | 1.32669700  | 0.03507400  |
| H | -2.31869500 | 1.84241900  | -0.23273800 |
| C | -3.48437800 | 1.13605800  | 1.37102900  |
| H | -4.46972300 | -2.38094200 | -0.52950900 |
| H | -2.69559400 | 1.23028000  | 2.10846800  |
| H | -4.44988000 | 0.77688200  | 1.71104600  |
| C | -4.37084900 | 1.47694300  | -0.95449000 |
| H | -4.07907300 | 1.17761200  | -1.96319900 |
| H | -5.23194600 | 0.88021700  | -0.65200900 |
| H | -4.67634500 | 2.52619600  | -1.00333900 |
| C | 3.20562600  | 0.37236000  | 0.71305900  |
| H | 3.41890600  | -0.07894000 | 1.68488400  |

|   |             |             |             |
|---|-------------|-------------|-------------|
| C | 3.51253300  | 1.86870200  | 0.74605300  |
| H | 2.88291300  | 2.35352200  | 1.49304400  |
| H | 4.55924200  | 2.04482400  | 0.99936700  |
| H | 3.31444200  | 2.32371800  | -0.22550900 |
| C | 4.07612300  | -0.33783800 | -0.30389000 |
| O | 4.62869100  | 0.18737600  | -1.23695100 |
| O | 4.14467700  | -1.65623200 | -0.07230200 |
| H | 4.67513800  | -2.06552500 | -0.77162400 |
| O | -4.35127400 | -1.52569200 | -0.09219600 |
| O | -2.95558400 | -1.53318400 | 0.17414700  |

TS16

|   |             |             |             |
|---|-------------|-------------|-------------|
| C | -1.39312000 | -0.50726100 | -0.86206100 |
| C | -0.05744500 | -0.84573100 | -0.99741200 |
| C | 0.89418600  | -0.40342200 | -0.07381400 |
| C | 0.47682800  | 0.39347100  | 0.99997400  |
| C | -0.85328200 | 0.74048000  | 1.14707300  |
| C | -1.81631100 | 0.29407000  | 0.21758600  |
| H | -2.12322800 | -0.85821700 | -1.58103600 |
| H | 0.25611900  | -1.46489700 | -1.83099800 |
| H | 1.20448500  | 0.74582500  | 1.72452100  |
| H | -1.16476800 | 1.36002900  | 1.98101700  |
| C | -3.17994600 | 0.67897700  | 0.38195800  |
| H | -3.52294900 | 1.20958000  | 1.26621300  |
| H | -5.92628300 | -0.01423000 | -0.09307500 |
| C | 2.35328000  | -0.80107800 | -0.21140800 |
| H | 2.47681600  | -1.30759300 | -1.17150000 |
| C | 2.81028300  | -1.71068000 | 0.92838600  |
| H | 2.20167500  | -2.61567300 | 0.93892600  |
| H | 3.85710800  | -1.99113300 | 0.80246400  |
| H | 2.70309200  | -1.20692000 | 1.89008800  |
| C | 3.19173400  | 0.46110300  | -0.26983300 |

|   |             |             |             |
|---|-------------|-------------|-------------|
| O | 3.86272900  | 0.89474600  | 0.63122800  |
| O | 3.08119300  | 1.07931800  | -1.45357900 |
| H | 3.59729200  | 1.89850700  | -1.42566700 |
| O | -5.13486100 | -0.53790700 | 0.09969600  |
| O | -4.07363700 | 0.36948600  | -0.53530100 |

TS17

|   |             |             |             |
|---|-------------|-------------|-------------|
| C | -0.41770500 | -0.91790700 | 1.18969500  |
| C | 0.87346300  | -0.44951400 | 1.40959000  |
| C | 1.64749600  | 0.02369300  | 0.35140400  |
| C | 1.10821100  | 0.00278000  | -0.93559300 |
| C | -0.18176200 | -0.46765300 | -1.15292000 |
| C | -0.96743800 | -0.92348100 | -0.09231700 |
| H | -1.01021400 | -1.27553700 | 2.02445000  |
| H | 1.28291000  | -0.45130900 | 2.41430200  |
| H | 1.70106500  | 0.34881200  | -1.77691000 |
| H | -0.58013400 | -0.48293600 | -2.16249800 |
| C | -2.38301000 | -1.37903000 | -0.31706100 |
| H | -2.53256700 | -1.67710700 | -1.35794800 |
| H | -2.59567400 | -2.26119400 | 0.29705100  |
| C | -3.44567200 | -0.33307400 | 0.07072800  |
| C | -4.86673000 | -0.63316200 | -0.38880500 |
| H | -5.21383900 | -1.53327000 | 0.12594200  |
| H | -5.52682600 | 0.19455200  | -0.12881100 |
| H | -4.91551000 | -0.81526900 | -1.46397000 |
| C | -3.08955200 | 1.14143200  | -1.39583200 |
| H | -2.19930300 | 1.74301000  | -1.50058600 |
| H | -3.07131500 | 0.24937600  | -2.01205100 |
| H | -4.02305700 | 1.68578400  | -1.38475400 |
| C | 3.04881300  | 0.56509500  | 0.58988600  |
| H | 3.29534500  | 0.40966300  | 1.64297100  |
| C | 3.16481500  | 2.04600200  | 0.23455300  |



|   |             |             |             |
|---|-------------|-------------|-------------|
| H | 2.46281800  | 2.62204400  | 0.83872000  |
| H | 4.17499400  | 2.41262500  | 0.42368000  |
| H | 2.93312500  | 2.20946900  | -0.81877500 |
| C | 4.02612400  | -0.26632800 | -0.21577500 |
| O | 4.55849500  | 0.07802100  | -1.24014400 |
| O | 4.22186000  | -1.47573900 | 0.32868600  |
| H | 4.82086600  | -1.97833800 | -0.24265000 |
| O | -2.66023900 | 1.88522300  | 0.66898400  |
| H | -2.42326100 | 2.68634500  | 1.17769000  |
| O | -3.33033200 | 0.19501400  | 1.21982800  |

TS18

|   |             |             |             |
|---|-------------|-------------|-------------|
| C | 0.81004000  | -1.56454200 | -0.30159100 |
| C | -0.49302000 | -1.35071900 | -0.76200500 |
| C | -1.22999000 | -0.25122400 | -0.32240400 |
| C | -0.65648400 | 0.63909000  | 0.59083400  |
| C | 0.64161900  | 0.43648600  | 1.06216700  |
| C | 1.33226600  | -0.66924300 | 0.60753100  |
| H | 1.38234500  | -2.41691600 | -0.65404700 |
| H | -0.93395500 | -2.04337300 | -1.47240900 |
| H | -1.22584500 | 1.49786000  | 0.93651600  |
| H | 1.08455800  | 1.13323000  | 1.76696700  |
| C | 3.65254700  | -0.74241100 | 0.99086000  |
| H | 3.51105900  | -0.47653600 | 2.03298200  |
| H | 3.64950900  | -1.79966300 | 0.74698400  |
| C | 4.05977100  | 0.17580800  | 0.08932100  |
| C | 4.30884000  | -0.18516400 | -1.34490100 |
| H | 4.26693100  | -1.26336100 | -1.50444600 |
| H | 3.55568900  | 0.28884500  | -1.98581900 |
| H | 5.28349700  | 0.18339600  | -1.67902000 |
| C | 4.12837300  | 1.63573900  | 0.42577000  |
| H | 3.98753800  | 1.81305100  | 1.49269800  |

|   |             |             |             |
|---|-------------|-------------|-------------|
| H | 5.08820900  | 2.06282600  | 0.11953000  |
| H | 3.35007900  | 2.18198900  | -0.12092000 |
| C | -2.63407500 | 0.00096400  | -0.85244000 |
| H | -2.92647200 | -0.86263800 | -1.45468600 |
| C | -2.71548900 | 1.27680300  | -1.68866500 |
| H | -2.02710200 | 1.20362400  | -2.53152200 |
| H | -3.72606500 | 1.42774300  | -2.07163400 |
| H | -2.44161900 | 2.14758000  | -1.09109900 |
| C | -3.58910700 | 0.05773100  | 0.32244300  |
| O | -4.08007400 | 1.05986800  | 0.77671000  |
| O | -3.81656100 | -1.15671800 | 0.84286600  |
| H | -4.39702400 | -1.05875900 | 1.61180700  |

#### TS19

|   |             |             |             |
|---|-------------|-------------|-------------|
| C | 0.47574228  | 0.28290877  | -1.24713020 |
| C | -0.81797324 | 0.78985236  | -1.17008370 |
| C | -1.68000723 | 0.38683536  | -0.15172213 |
| C | -1.22364267 | -0.54302454 | 0.78381493  |
| C | 0.06709758  | -1.05239628 | 0.70026973  |
| C | 0.93891615  | -0.64279338 | -0.31109782 |
| H | 1.13617606  | 0.61081227  | -2.04221588 |
| H | -1.16098677 | 1.50553905  | -1.91002711 |
| H | -1.88198994 | -0.87777059 | 1.57988308  |
| H | 0.40422195  | -1.77957487 | 1.43222854  |
| C | 2.34739315  | -1.17835838 | -0.37388282 |
| H | 2.40293715  | -2.12865238 | 0.16344518  |
| H | 2.62946815  | -1.37424738 | -1.41256282 |
| C | 3.42203015  | -0.25647738 | 0.23214918  |
| C | 4.77319315  | -0.96023038 | 0.22243718  |
| H | 5.00531415  | -1.32364838 | -0.78115982 |
| H | 5.55844715  | -0.27400138 | 0.54165818  |
| H | 4.75703415  | -1.81009838 | 0.90790618  |

|   |             |             |             |
|---|-------------|-------------|-------------|
| C | 3.05279115  | 0.23015162  | 1.62782318  |
| H | 2.15595015  | 0.85260762  | 1.59736018  |
| H | 2.85344315  | -0.62665838 | 2.27583218  |
| H | 3.87178915  | 0.80279662  | 2.06558918  |
| C | -3.08336871 | 0.96295412  | -0.04494480 |
| H | -3.27196815 | 1.56249249  | -0.93889369 |
| C | -3.25884212 | 1.81752357  | 1.20899104  |
| H | -2.54775932 | 2.64432093  | 1.18784811  |
| H | -4.26988701 | 2.22408218  | 1.26512325  |
| H | -3.07635631 | 1.22533283  | 2.10697630  |
| C | -4.07609818 | -0.18111273 | -0.06907009 |
| O | -4.67178420 | -0.61027904 | 0.88601472  |
| O | -4.20634335 | -0.70448520 | -1.29650220 |
| H | -4.81827963 | -1.45359305 | -1.24955976 |
| O | 4.32086632  | 1.91300062  | -0.47548540 |
| O | 3.44979246  | 1.03753524  | -0.85639022 |

## TS20

|   |             |             |             |
|---|-------------|-------------|-------------|
| C | -0.54169900 | -0.20857000 | 0.87477900  |
| C | 0.78952200  | -0.07342100 | 1.23807600  |
| C | 1.76182900  | 0.24224000  | 0.28666200  |
| C | 1.37462800  | 0.40731000  | -1.04544000 |
| C | 0.04592800  | 0.26414700  | -1.41465100 |
| C | -0.94116300 | -0.03265200 | -0.46120900 |
| H | -1.28125600 | -0.46508300 | 1.62445100  |
| H | 1.08038300  | -0.21561200 | 2.27313800  |
| H | 2.11830600  | 0.64360200  | -1.80018300 |
| H | -0.24002600 | 0.38848100  | -2.45336400 |
| C | -2.33472600 | -0.20361500 | -0.88965500 |
| H | -2.47365000 | -0.05585800 | -1.95977100 |
| H | -2.69602000 | -1.40534000 | -0.59898200 |
| C | -3.52261200 | 0.31800700  | -0.03327900 |

|   |             |             |             |
|---|-------------|-------------|-------------|
| C | -4.78090300 | 0.36718400  | -0.89080900 |
| H | -4.95509600 | -0.59376500 | -1.37651900 |
| H | -5.64158700 | 0.61426400  | -0.26663000 |
| H | -4.67611500 | 1.13425600  | -1.66057700 |
| C | -3.28231900 | 1.63125100  | 0.68734800  |
| H | -2.42449900 | 1.57404900  | 1.35632600  |
| H | -3.09858500 | 2.41672800  | -0.04859000 |
| H | -4.16824400 | 1.90277100  | 1.26522800  |
| C | 3.21467300  | 0.42414400  | 0.69104200  |
| H | 3.31443200  | 0.12971400  | 1.73840800  |
| C | 3.68372600  | 1.86584600  | 0.50052600  |
| H | 3.06656100  | 2.53225200  | 1.10432700  |
| H | 4.72510200  | 1.97646600  | 0.80628700  |
| H | 3.59885600  | 2.16334100  | -0.54553300 |
| C | 4.06135400  | -0.53830300 | -0.11903200 |
| O | 4.75735300  | -0.23746800 | -1.05460100 |
| O | 3.92622500  | -1.80072900 | 0.30851300  |
| H | 4.44981800  | -2.38057500 | -0.26415400 |
| O | -3.52399200 | -1.90359200 | 0.29599900  |
| O | -3.64306000 | -0.70084800 | 0.98258700  |

TS20-H<sub>2</sub>O

|   |             |             |             |
|---|-------------|-------------|-------------|
| C | -0.49259195 | -0.43937729 | 0.80715259  |
| C | 0.83887962  | -0.29470944 | 1.16583629  |
| C | 1.76261464  | 0.25957527  | 0.27718932  |
| C | 1.32702102  | 0.65568954  | -0.98970457 |
| C | -0.00164987 | 0.50448118  | -1.35579994 |
| C | -0.94116300 | -0.03265200 | -0.46120900 |
| H | -1.19348413 | -0.88209673 | 1.50536547  |
| H | 1.16816513  | -0.61675514 | 2.14768625  |
| H | 2.03303824  | 1.07985384  | -1.69691896 |
| H | -0.32511972 | 0.81005934  | -2.34481085 |

|   |             |             |             |
|---|-------------|-------------|-------------|
| C | -2.33472600 | -0.20361500 | -0.88965500 |
| H | -2.47365000 | -0.05585800 | -1.95977100 |
| H | -2.48632856 | -1.49886622 | -0.84832536 |
| C | -3.52261200 | 0.31800700  | -0.03327900 |
| C | -4.77492042 | 0.39218744  | -0.89774022 |
| H | -4.95581182 | -0.55996876 | -1.39809735 |
| H | -5.63695749 | 0.63923524  | -0.27541845 |
| H | -4.65750366 | 1.16894187  | -1.65588836 |
| C | -3.27352258 | 1.61840867  | 0.70737190  |
| H | -2.42055231 | 1.54297280  | 1.38072912  |
| H | -3.07719117 | 2.41227821  | -0.01620406 |
| H | -4.16025930 | 1.89080547  | 1.28359189  |
| C | 3.21398692  | 0.44961295  | 0.68311067  |
| H | 3.36170151  | -0.03576188 | 1.65068914  |
| C | 3.59339426  | 1.92722543  | 0.76984665  |
| H | 2.95716794  | 2.42397981  | 1.50334265  |
| H | 4.63532719  | 2.04100231  | 1.07253650  |
| H | 3.46039990  | 2.41627421  | -0.19611889 |
| C | 4.09013758  | -0.28262600 | -0.31467636 |
| O | 4.73947128  | 0.23686325  | -1.18571155 |
| O | 4.04069848  | -1.60995410 | -0.13994833 |
| H | 4.57949542  | -2.03383758 | -0.82430142 |
| O | -4.02512120 | -1.92261831 | 1.12225595  |
| O | -3.88583433 | -0.54060704 | 1.06917664  |
| O | -2.81227449 | -2.73852081 | -0.82849543 |
| H | -3.48920045 | -2.96297656 | -1.47113908 |
| H | -3.44774840 | -2.61593361 | 0.26562282  |

TS20-NH<sub>3</sub>

|   |             |             |            |
|---|-------------|-------------|------------|
| C | -0.47795547 | -0.49611089 | 0.78218443 |
| C | 0.85346892  | -0.34884428 | 1.13998459 |
| C | 1.76260924  | 0.26434549  | 0.27530341 |

|   |             |             |             |
|---|-------------|-------------|-------------|
| C | 1.31255112  | 0.71733866  | -0.96723968 |
| C | -0.01602099 | 0.56396123  | -1.33279080 |
| C | -0.94116300 | -0.03265200 | -0.46120900 |
| H | -1.16727248 | -0.98470925 | 1.46105501  |
| H | 1.19419848  | -0.71508117 | 2.10224528  |
| H | 2.00721970  | 1.18794595  | -1.65607363 |
| H | -0.35072854 | 0.91420916  | -2.30307456 |
| C | -2.33472600 | -0.20361500 | -0.88965500 |
| H | -2.47365000 | -0.05585800 | -1.95977100 |
| H | -2.48632856 | -1.49886622 | -0.84832536 |
| C | -3.52261200 | 0.31800700  | -0.03327900 |
| C | -4.76255711 | 0.44044821  | -0.90998681 |
| H | -4.95583981 | -0.49399581 | -1.43832056 |
| H | -5.62716855 | 0.68754705  | -0.29126705 |
| H | -4.62074259 | 1.23502368  | -1.64514748 |
| C | -3.25730129 | 1.59262218  | 0.74557924  |
| H | -2.41427296 | 1.48203290  | 1.42655799  |
| H | -3.03668262 | 2.40179973  | 0.04636815  |
| H | -4.14554705 | 1.86679730  | 1.31862283  |
| C | 3.21352901  | 0.45641193  | 0.68188706  |
| H | 3.37514441  | -0.07506399 | 1.62264752  |
| C | 3.57060828  | 1.93351928  | 0.84144887  |
| H | 2.93165410  | 2.38229565  | 1.60296220  |
| H | 4.61264142  | 2.04821195  | 1.14344736  |
| H | 3.42366491  | 2.46881437  | -0.09759982 |
| C | 4.09426255  | -0.21031328 | -0.35694822 |
| O | 4.72969525  | 0.36290591  | -1.20420891 |
| O | 4.06651461  | -1.54541465 | -0.24967104 |
| H | 4.60725220  | -1.92545538 | -0.95783090 |
| O | -4.08282635 | -1.94276835 | 1.05448614  |
| O | -3.91597897 | -0.56285850 | 1.04091622  |
| H | -3.46290316 | -3.03255949 | -1.49457854 |
| H | -3.44774840 | -2.61593361 | 0.26562282  |

|   |             |             |             |
|---|-------------|-------------|-------------|
| N | -2.75777195 | -2.79875142 | -0.82515807 |
| H | -1.97242012 | -3.52291569 | -0.61940331 |

TS20-CH<sub>3</sub>OH

|   |             |             |             |
|---|-------------|-------------|-------------|
| C | -0.41276267 | -0.70570091 | 0.65377119  |
| C | 0.91801595  | -0.54771110 | 1.00939290  |
| C | 1.76172882  | 0.28417495  | 0.27025451  |
| C | 1.24709753  | 0.94767217  | -0.84625547 |
| C | -0.08071254 | 0.78545156  | -1.21075653 |
| C | -0.94116300 | -0.03265200 | -0.46120900 |
| H | -1.05033997 | -1.36425905 | 1.23217238  |
| H | 1.30968852  | -1.07712472 | 1.87106891  |
| H | 1.89077530  | 1.59099318  | -1.43815483 |
| H | -0.46567454 | 1.30123829  | -2.08363776 |
| C | -2.33472600 | -0.20361500 | -0.88965500 |
| H | -2.47365000 | -0.05585800 | -1.95977100 |
| H | -2.48632856 | -1.49886622 | -0.84832536 |
| C | -3.52261200 | 0.31800700  | -0.03327900 |
| C | -4.78618079 | 0.34404598  | -0.88403642 |
| H | -4.95400482 | -0.62480524 | -1.35609870 |
| H | -5.64560087 | 0.59119164  | -0.25814421 |
| H | -4.69307234 | 1.10188312  | -1.66438022 |
| C | -3.29069900 | 1.64281889  | 0.66867799  |
| H | -2.42857516 | 1.60250337  | 1.33334026  |
| H | -3.11863136 | 2.42024729  | -0.07854008 |
| H | -4.17585455 | 1.91355473  | 1.24810293  |
| C | 3.21058351  | 0.48386384  | 0.68051346  |
| H | 3.43271189  | -0.21430696 | 1.49096576  |
| C | 3.48390772  | 1.91865366  | 1.12938286  |
| H | 2.84336116  | 2.16297801  | 1.97765813  |
| H | 4.52615202  | 2.03733556  | 1.42910270  |
| H | 3.27624417  | 2.62116078  | 0.32110987  |

|   |             |             |             |
|---|-------------|-------------|-------------|
| C | 4.09671338  | 0.09786229  | -0.48789121 |
| O | 4.67025675  | 0.86950412  | -1.21302742 |
| O | 4.15182148  | -1.23049826 | -0.65280130 |
| H | 4.69194101  | -1.42470325 | -1.43310496 |
| O | -3.96703453 | -1.89949698 | 1.18874514  |
| O | -3.85580649 | -0.51700511 | 1.09645246  |
| O | -2.78628220 | -2.74341468 | -0.89869312 |
| H | -3.44774840 | -2.61593361 | 0.26562282  |
| C | -3.77597099 | -3.11826762 | -1.86041105 |
| H | -4.56820633 | -2.39907235 | -1.85579318 |
| H | -3.33228991 | -3.15391965 | -2.83343522 |
| H | -4.16795278 | -4.08229516 | -1.61161156 |

#### TS20-C<sub>2</sub>H<sub>5</sub>OH

|   |             |             |             |
|---|-------------|-------------|-------------|
| C | -0.37877646 | -0.79337832 | 0.57821364  |
| C | 0.95144738  | -0.63022496 | 0.93357941  |
| C | 1.76084103  | 0.29380251  | 0.26930045  |
| C | 1.21247324  | 1.04558727  | -0.77270766 |
| C | -0.11477828 | 0.87916623  | -1.13734933 |
| C | -0.94116300 | -0.03265200 | -0.46120900 |
| H | -0.98928957 | -1.52331918 | 1.09706974  |
| H | 1.36966231  | -1.22785287 | 1.73614335  |
| H | 1.82934703  | 1.76184762  | -1.30652944 |
| H | -0.52603911 | 1.46451401  | -1.95244800 |
| C | -2.33472600 | -0.20361500 | -0.88965500 |
| H | -2.47365000 | -0.05585800 | -1.95977100 |
| H | -2.48632856 | -1.49886622 | -0.84832536 |
| C | -3.52261200 | 0.31800700  | -0.03327900 |
| C | -4.77492042 | 0.39218744  | -0.89774022 |
| H | -4.95581182 | -0.55996876 | -1.39809736 |
| H | -5.63695749 | 0.63923524  | -0.27541846 |
| H | -4.65750365 | 1.16894188  | -1.65588836 |



|   |             |             |             |
|---|-------------|-------------|-------------|
| C | -3.27352258 | 1.61840867  | 0.70737191  |
| H | -2.42055231 | 1.54297279  | 1.38072913  |
| H | -3.07719116 | 2.41227821  | -0.01620405 |
| H | -4.16025930 | 1.89080547  | 1.28359189  |
| C | 3.20859435  | 0.49675716  | 0.68183859  |
| H | 3.46156673  | -0.26896399 | 1.41892237  |
| C | 3.44611544  | 1.88942318  | 1.26396983  |
| H | 2.81002535  | 2.03179379  | 2.13843264  |
| H | 4.48835207  | 2.01013976  | 1.56290273  |
| H | 3.20750364  | 2.65968532  | 0.52932279  |
| C | 4.09001831  | 0.25155243  | -0.52744188 |
| O | 4.63131143  | 1.10615717  | -1.18078569 |
| O | 4.18143121  | -1.05258201 | -0.82010387 |
| H | 4.71659080  | -1.15463706 | -1.62104548 |
| O | -4.02512121 | -1.92261831 | 1.12225594  |
| O | -3.88583433 | -0.54060704 | 1.06917663  |
| O | -2.84099974 | -2.77746333 | -0.90419909 |
| H | -3.44774840 | -2.61593361 | 0.26562282  |
| C | -3.85338909 | -3.16091429 | -1.88797600 |
| H | -4.64562443 | -2.44171902 | -1.88335813 |
| H | -3.40970801 | -3.19656632 | -2.86100017 |
| C | -4.41754979 | -4.54839317 | -1.52989076 |
| H | -4.86123189 | -4.51274056 | -0.55686708 |
| H | -5.15808479 | -4.82887786 | -2.24949916 |
| H | -3.62531427 | -5.26758826 | -1.53450666 |

TS20-HCOOH

|   |             |             |             |
|---|-------------|-------------|-------------|
| C | -0.38901953 | -0.76827517 | 0.60151331  |
| C | 0.94138487  | -0.60665192 | 0.95690234  |
| C | 1.76113486  | 0.29094434  | 0.26948524  |
| C | 1.22293937  | 1.01743389  | -0.79551571 |
| C | -0.10449037 | 0.85225372  | -1.16007287 |

|   |             |             |             |
|---|-------------|-------------|-------------|
| C | -0.94116300 | -0.03265200 | -0.46120900 |
| H | -1.00769508 | -1.47775661 | 1.13875462  |
| H | 1.35160116  | -1.18475282 | 1.77769079  |
| H | 1.84790515  | 1.71275825  | -1.34730339 |
| H | -0.50781889 | 1.41766152  | -1.99301552 |
| C | -2.33472600 | -0.20361500 | -0.88965500 |
| H | -2.47365000 | -0.05585800 | -1.95977100 |
| H | -2.48632856 | -1.49886622 | -0.84832536 |
| C | -3.52261200 | 0.31800700  | -0.03327900 |
| C | -4.80215620 | 0.26587110  | -0.85857942 |
| H | -4.94723846 | -0.72799388 | -1.28386042 |
| H | -5.65722112 | 0.51349612  | -0.22693811 |
| H | -4.74845824 | 0.99053305  | -1.67338268 |
| C | -3.32073475 | 1.67963053  | 0.60459304  |
| H | -2.44539199 | 1.69646144  | 1.25278327  |
| H | -3.18814680 | 2.42783862  | -0.17958941 |
| H | -4.20315931 | 1.94791252  | 1.18930081  |
| C | 3.20922164  | 0.49295808  | 0.68131421  |
| H | 3.45294100  | -0.25358913 | 1.44084337  |
| C | 3.45705207  | 1.89954835  | 1.22435711  |
| H | 2.81929511  | 2.07236310  | 2.09209344  |
| H | 4.49929822  | 2.01965445  | 1.52350263  |
| H | 3.22772448  | 2.65057884  | 0.46718627  |
| C | 4.09252436  | 0.20565859  | -0.51728002 |
| O | 4.64353650  | 1.03651328  | -1.19275891 |
| O | 4.17341729  | -1.10704568 | -0.77230516 |
| H | 4.71035576  | -1.23658407 | -1.56806604 |
| O | -3.87158096 | -1.85544389 | 1.29431664  |
| O | -3.80713660 | -0.47565156 | 1.13877424  |
| O | -2.85039453 | -2.81054160 | -0.88405941 |
| H | -3.44774840 | -2.61593361 | 0.26562282  |
| C | -3.65765568 | -3.45188711 | -1.87497080 |
| H | -4.54824860 | -2.88051327 | -2.03395562 |

O -3.47279548 -4.50606705 -2.52538384

TS20-CH<sub>3</sub>COOH

C -0.35962170 -0.83747196 0.53350559  
C 0.97023568 -0.67151359 0.88894400  
C 1.76023495 0.29905362 0.26917644  
C 1.19283507 1.09530886 -0.72867297  
C -0.13406190 0.92662142 -1.09356352  
C -0.94116300 -0.03265200 -0.46120900  
H -0.95485881 -1.60339893 1.01703453  
H 1.40340626 -1.30343252 1.65654640  
H 1.79454741 1.84846242 -1.22790217  
H -0.56016958 1.54704770 -1.87436876  
C -2.33472600 -0.20361500 -0.88965500  
H -2.47365000 -0.05585800 -1.95977100  
H -2.48632856 -1.49886622 -0.84832536  
C -3.52261200 0.31800700 -0.03327900  
C -4.81416115 0.19470459 -0.83188378  
H -4.93686767 -0.81962773 -1.21366047  
H -5.66514538 0.44311814 -0.19506240  
H -4.79627157 0.88646640 -1.67631752  
C -3.35043349 1.71003532 0.54487800  
H -2.46486478 1.77901693 1.17548754  
H -3.25387244 2.42887102 -0.27138680  
H -4.23019235 1.97635082 1.13448119  
C 3.20736142 0.50367433 0.68308867  
H 3.47754439 -0.29534779 1.37748137  
C 3.42664150 1.86765296 1.33599773  
H 2.79436644 1.95370371 2.22052513  
H 4.46884477 1.98950520 1.63458595  
H 3.17076127 2.67131540 0.64419023  
C 4.08427937 0.33645505 -0.54265414

|   |             |             |             |
|---|-------------|-------------|-------------|
| O | 4.60739952  | 1.23276931  | -1.15353194 |
| O | 4.19445525  | -0.94891918 | -0.90383050 |
| H | 4.72567604  | -1.00020419 | -1.71221952 |
| O | -3.78344406 | -1.80818925 | 1.38778906  |
| O | -3.76293001 | -0.43467858 | 1.17513675  |
| O | -2.84871239 | -2.71527155 | -0.88240145 |
| H | -3.44774840 | -2.61593361 | 0.26562282  |
| C | -3.65718358 | -3.35798206 | -1.87144014 |
| O | -3.83836570 | -3.09055556 | -3.08146570 |
| C | -4.37948048 | -4.56278170 | -1.24029435 |
| H | -3.65584854 | -5.25618518 | -0.86552987 |
| H | -5.00002828 | -4.22556890 | -0.43648594 |
| H | -4.98442008 | -5.04369173 | -1.98034409 |

#### TS21

|   |             |             |             |
|---|-------------|-------------|-------------|
| C | -0.53209200 | -0.18332900 | -0.86433800 |
| C | 0.80928600  | -0.20671300 | -1.22444200 |
| C | 1.80749000  | -0.35132200 | -0.26149700 |
| C | 1.43603900  | -0.44679100 | 1.08307200  |
| C | 0.10049500  | -0.40828400 | 1.44874100  |
| C | -0.91498100 | -0.30335000 | 0.48135000  |
| H | -1.28856700 | -0.02783200 | -1.62304800 |
| H | 1.08462600  | -0.10116400 | -2.26832300 |
| H | 2.19899700  | -0.54299800 | 1.84961800  |
| H | -0.17247300 | -0.47173700 | 2.49679400  |
| C | -2.30134300 | -0.26886900 | 0.92031500  |
| H | -2.45957300 | 0.10933800  | 1.92788200  |
| H | -2.87913500 | 2.61418700  | 0.06024000  |
| C | -3.43073300 | -0.59171800 | 0.18845200  |
| C | -4.76576300 | -0.51370900 | 0.87778300  |
| H | -4.79167700 | 0.30227600  | 1.60060700  |
| H | -5.55823900 | -0.36284200 | 0.14283400  |

|   |             |             |             |
|---|-------------|-------------|-------------|
| H | -4.96596600 | -1.45394900 | 1.40093300  |
| C | -3.39711700 | -1.46888300 | -1.03754700 |
| H | -2.42273000 | -1.92808600 | -1.19728500 |
| H | -4.13960900 | -2.26230400 | -0.92383900 |
| H | -3.66643900 | -0.89574100 | -1.92975500 |
| C | 3.27211000  | -0.41211900 | -0.66018000 |
| H | 3.34124800  | -0.19079800 | -1.72808600 |
| C | 3.89196200  | -1.77679700 | -0.36404500 |
| H | 3.34806000  | -2.55055400 | -0.90715600 |
| H | 4.93879100  | -1.80075700 | -0.67104500 |
| H | 3.84207500  | -1.99919000 | 0.70284100  |
| C | 4.01597400  | 0.69230800  | 0.06481000  |
| O | 4.75627600  | 0.53693500  | 1.00190600  |
| O | 3.73468700  | 1.90033400  | -0.44280500 |
| H | 4.20233100  | 2.57094300  | 0.07635300  |
| O | -3.75912900 | 2.22930100  | -0.06256600 |
| O | -3.55179400 | 1.13701300  | -0.86208500 |

## TS22

|   |             |             |             |
|---|-------------|-------------|-------------|
| C | 0.48197100  | 0.86011100  | -0.88310000 |
| C | -0.80796700 | 1.25142000  | -0.53554200 |
| C | -1.69659100 | 0.34142000  | 0.03313700  |
| C | -1.27327900 | -0.97319700 | 0.23616600  |
| C | 0.01237500  | -1.36320700 | -0.11967500 |
| C | 0.91091300  | -0.44976800 | -0.67563200 |
| H | 1.16400400  | 1.58172100  | -1.31866000 |
| H | -1.12536800 | 2.27435800  | -0.70862000 |
| H | -1.95483700 | -1.70068100 | 0.66682700  |
| H | 0.32152700  | -2.39224100 | 0.03460300  |
| C | 2.31140500  | -0.87412100 | -1.04391000 |
| H | 2.29794900  | -1.93001800 | -1.34454800 |
| H | 2.66791000  | -0.30948400 | -1.90898500 |

|   |             |             |             |
|---|-------------|-------------|-------------|
| C | 3.34610100  | -0.78097900 | 0.05459700  |
| C | 4.69500300  | -0.74034000 | -0.29659800 |
| H | 4.80442300  | 0.56994100  | -0.17408500 |
| H | 5.41765700  | -1.10003900 | 0.43091200  |
| H | 4.95198900  | -0.89864800 | -1.34102500 |
| C | 2.93045700  | -1.09748300 | 1.45515000  |
| H | 2.04133200  | -0.53702600 | 1.74589600  |
| H | 2.68272300  | -2.16425400 | 1.51085500  |
| H | 3.73910100  | -0.89545200 | 2.15753900  |
| C | -3.09573500 | 0.77050600  | 0.44631400  |
| H | -3.25677700 | 1.78902100  | 0.08503600  |
| C | -3.29006200 | 0.70991200  | 1.96046400  |
| H | -2.56695100 | 1.36596700  | 2.44667000  |
| H | -4.29641900 | 1.02856400  | 2.23667600  |
| H | -3.13946500 | -0.30656200 | 2.32701100  |
| C | -4.09975800 | -0.11180600 | -0.26745000 |
| O | -4.72261200 | -1.01095700 | 0.23745100  |
| O | -4.20532200 | 0.20012100  | -1.56674300 |
| H | -4.82514300 | -0.41624400 | -1.98383700 |
| O | 4.34116900  | 1.75600800  | 0.09281000  |
| O | 3.15268400  | 1.40311100  | 0.35576000  |

#### TS22-H<sub>2</sub>O

|   |             |             |             |
|---|-------------|-------------|-------------|
| C | 0.35384341  | 0.71430646  | -1.20234001 |
| C | -0.93550220 | 1.10801466  | -0.85529378 |
| C | -1.69494004 | 0.34806013  | 0.03176412  |
| C | -1.14338135 | -0.82217774 | 0.55612850  |
| C | 0.14096771  | -1.21731308 | 0.20123078  |
| C | 0.91091300  | -0.44976800 | -0.67563200 |
| H | 0.93475299  | 1.31997670  | -1.88886032 |
| H | -1.35391945 | 2.01498413  | -1.27889137 |
| H | -1.72367294 | -1.43484764 | 1.23959060  |

|   |             |             |             |
|---|-------------|-------------|-------------|
| H | 0.55030495  | -2.13606743 | 0.60942327  |
| C | 2.31140500  | -0.87412100 | -1.04391000 |
| H | 2.29794900  | -1.93001800 | -1.34454800 |
| H | 2.66791000  | -0.30948400 | -1.90898500 |
| C | 3.34610100  | -0.78097900 | 0.05459700  |
| C | 4.69589936  | -0.76665973 | -0.29521066 |
| H | 5.44345816  | 0.24044900  | -0.09164299 |
| H | 5.41194176  | -1.12684683 | 0.43856828  |
| H | 4.95163828  | -0.94438114 | -1.33681696 |
| C | 3.25992182  | -1.86121076 | 1.08423573  |
| H | 2.37598444  | -1.74670141 | 1.71251184  |
| H | 3.17770168  | -2.82576030 | 0.56910508  |
| H | 4.15438070  | -1.87941818 | 1.70687828  |
| C | -3.09111018 | 0.79002577  | 0.44140944  |
| H | -3.36808694 | 1.64802969  | -0.17579576 |
| C | -3.16413928 | 1.15866932  | 1.92223810  |
| H | -2.46686378 | 1.97135097  | 2.12972151  |
| H | -4.17082785 | 1.48005873  | 2.19403499  |
| H | -2.89731758 | 0.30348766  | 2.54491463  |
| C | -4.06470820 | -0.32224979 | 0.10832434  |
| O | -4.56595823 | -1.07369127 | 0.90546219  |
| O | -4.29539984 | -0.40737037 | -1.20930245 |
| H | -4.88834532 | -1.15565983 | -1.37218226 |
| O | 3.90027608  | 1.27921819  | 1.36454414  |
| O | 3.22561460  | 0.52143777  | 0.60508623  |
| O | 6.21170988  | 1.16608470  | 0.38578917  |
| H | 6.80299197  | 0.89714854  | 1.09265467  |
| H | 5.01440485  | 1.32490547  | 0.91763873  |

TS22-NH<sub>3</sub>

|   |             |            |             |
|---|-------------|------------|-------------|
| C | 0.33834793  | 0.69139230 | -1.23486327 |
| C | -0.95094550 | 1.08536394 | -0.88792216 |

|   |             |             |             |
|---|-------------|-------------|-------------|
| C | -1.69479410 | 0.34879009  | 0.03147800  |
| C | -1.12770792 | -0.79865483 | 0.58862706  |
| C | 0.15652440  | -1.19435590 | 0.23393725  |
| C | 0.91091300  | -0.44976800 | -0.67563200 |
| H | 0.90703762  | 1.27889880  | -1.94692413 |
| H | -1.38156798 | 1.97417508  | -1.33701077 |
| H | -1.69574779 | -1.39325305 | 1.29785681  |
| H | 0.57801989  | -2.09553358 | 0.66811232  |
| C | 2.31140500  | -0.87412100 | -1.04391000 |
| H | 2.29794900  | -1.93001800 | -1.34454800 |
| H | 2.66791000  | -0.30948400 | -1.90898500 |
| C | 3.34610100  | -0.78097900 | 0.05459700  |
| C | 4.69633246  | -0.83192567 | -0.29008473 |
| H | 5.44345816  | 0.24044900  | -0.09164299 |
| H | 5.39590378  | -1.19247591 | 0.45923929  |
| H | 4.94764657  | -1.05754328 | -1.32346215 |
| C | 3.21525263  | -1.81854095 | 1.12269219  |
| H | 2.33482508  | -1.64682005 | 1.74281139  |
| H | 3.09685854  | -2.79742260 | 0.64284939  |
| H | 4.10671138  | -1.84860538 | 1.74916594  |
| C | -3.09071172 | 0.79215449  | 0.44047185  |
| H | -3.38138690 | 1.62681537  | -0.20192855 |
| C | -3.15235697 | 1.20907717  | 1.90896093  |
| H | -2.46030489 | 2.03412226  | 2.08233474  |
| H | -4.15912078 | 1.53069165  | 2.18021235  |
| H | -2.87180688 | 0.37733161  | 2.55683941  |
| C | -4.05764490 | -0.33883605 | 0.15429648  |
| O | -4.54429366 | -1.06767837 | 0.98092003  |
| O | -4.30059593 | -0.46958390 | -1.15737585 |
| H | -4.88845757 | -1.22790360 | -1.28936532 |
| O | 3.97671017  | 1.30282527  | 1.29054839  |
| O | 3.27501115  | 0.54445549  | 0.55660740  |
| H | 6.82729786  | 0.88986636  | 1.09302397  |



|   |            |            |             |
|---|------------|------------|-------------|
| H | 5.07538686 | 1.32620305 | 0.89572402  |
| N | 6.21137902 | 1.17000819 | 0.35670575  |
| H | 6.48503154 | 1.90425348 | -0.29597350 |

TS22-CH<sub>3</sub>OH

|   |             |             |             |
|---|-------------|-------------|-------------|
| C | 0.44326554  | 0.82511230  | -0.98996189 |
| C | -0.84646016 | 1.21719183  | -0.64248442 |
| C | -1.69600024 | 0.34355108  | 0.03292800  |
| C | -1.23397697 | -0.93658548 | 0.34343815  |
| C | 0.05121246  | -1.32823648 | -0.01227866 |
| C | 0.91091300  | -0.44976800 | -0.67563200 |
| H | 1.09473393  | 1.51879470  | -1.50957345 |
| H | -1.19439632 | 2.21217832  | -0.89947439 |
| H | -1.88495206 | -1.63655745 | 0.85869910  |
| H | 0.39055690  | -2.33121967 | 0.22679812  |
| C | 2.31140500  | -0.87412100 | -1.04391000 |
| H | 2.29794900  | -1.93001800 | -1.34454800 |
| H | 2.66791000  | -0.30948400 | -1.90898500 |
| C | 3.34610100  | -0.78097900 | 0.05459700  |
| C | 4.69419112  | -0.72309385 | -0.29729558 |
| H | 5.44345816  | 0.24044900  | -0.09164299 |
| H | 5.42116788  | -1.08236673 | 0.42610664  |
| H | 4.95182712  | -0.86865050 | -1.34341600 |
| C | 3.29052572  | -1.88788328 | 1.05767113  |
| H | 2.40550185  | -1.81172203 | 1.69022214  |
| H | 3.23202515  | -2.84138684 | 0.51926216  |
| H | 4.18671961  | -1.89805043 | 1.67799772  |
| C | -3.09406234 | 0.77680001  | 0.44542247  |
| H | -3.29067897 | 1.75356151  | -0.00302818 |
| C | -3.24611834 | 0.85209427  | 1.96374213  |
| H | -2.52721617 | 1.56673383  | 2.36643794  |
| H | -4.25251530 | 1.17175476  | 2.23864012  |

|   |             |             |             |
|---|-------------|-------------|-------------|
| H | -3.05985040 | -0.12238778 | 2.41755326  |
| C | -4.09400857 | -0.19056360 | -0.15483656 |
| O | -4.67994749 | -1.05320614 | 0.44837822  |
| O | -4.24229403 | -0.00267454 | -1.47366696 |
| H | -4.85713744 | -0.66904118 | -1.81421708 |
| O | 3.85001226  | 1.26033664  | 1.41348915  |
| O | 3.19329986  | 0.50405243  | 0.63699794  |
| O | 6.24130432  | 1.21642027  | 0.39236904  |
| H | 5.01440485  | 1.32490547  | 0.91763873  |
| C | 7.15173233  | 0.85225117  | 1.43323488  |
| H | 7.36677541  | -0.19395372 | 1.36911148  |
| H | 8.05845396  | 1.41001909  | 1.32529585  |
| H | 6.71119667  | 1.06819809  | 2.38412670  |

TS22-C<sub>2</sub>H<sub>5</sub>OH

|   |             |             |             |
|---|-------------|-------------|-------------|
| C | 0.47126675  | 0.85133051  | -0.91368882 |
| C | -0.81860922 | 1.24285715  | -0.56614573 |
| C | -1.69641848 | 0.34202180  | 0.03309964  |
| C | -1.26240362 | -0.96396674 | 0.26688735  |
| C | 0.02311491  | -1.35443979 | -0.08893527 |
| C | 0.91091300  | -0.44976800 | -0.67563200 |
| H | 1.14484525  | 1.56592181  | -1.37331234 |
| H | -1.14445688 | 2.25876833  | -0.76324801 |
| H | -1.93550453 | -1.68455449 | 0.72176277  |
| H | 0.34060967  | -2.37699072 | 0.08959848  |
| C | 2.31140500  | -0.87412100 | -1.04391000 |
| H | 2.29794900  | -1.93001800 | -1.34454800 |
| H | 2.66791000  | -0.30948400 | -1.90898500 |
| C | 3.34610100  | -0.78097900 | 0.05459700  |
| C | 4.69632775  | -0.78843218 | -0.29376808 |
| H | 5.44345816  | 0.24044900  | -0.09164299 |
| H | 5.40688753  | -1.14887482 | 0.44519666  |

|   |             |             |             |
|---|-------------|-------------|-------------|
| H | 4.95080194  | -0.98217026 | -1.33282507 |
| C | 3.24486300  | -1.84733841 | 1.09724357  |
| H | 2.36184513  | -1.71371180 | 1.72303264  |
| H | 3.15066080  | -2.81696500 | 0.59382943  |
| H | 4.13837458  | -1.86952640 | 1.72111590  |
| C | -3.09524504 | 0.77228613  | 0.44612605  |
| H | -3.26618031 | 1.77992288  | 0.05976039  |
| C | -3.27732260 | 0.74989095  | 1.96284325  |
| H | -2.55501842 | 1.42326737  | 2.42602228  |
| H | -4.28368468 | 1.06883989  | 2.23869381  |
| H | -3.11680483 | -0.25563861 | 2.35450623  |
| C | -4.09864859 | -0.13509536 | -0.23639566 |
| O | -4.71127557 | -1.02495553 | 0.29669130  |
| O | -4.21651642 | 0.14212130  | -1.54248241 |
| H | -4.83527285 | -0.48908013 | -1.93843257 |
| O | 3.92562274  | 1.28771829  | 1.33994912  |
| O | 3.24196142  | 0.52952065  | 0.58900363  |
| O | 6.22913759  | 1.13801621  | 0.32093066  |
| H | 5.05940655  | 1.32644250  | 0.90018373  |
| C | 7.31030640  | 1.03073790  | 1.25069697  |
| H | 7.67230747  | 0.02389911  | 1.26213710  |
| H | 6.96761389  | 1.29767741  | 2.22855439  |
| C | 8.44685163  | 1.98010925  | 0.82813456  |
| H | 9.25583769  | 1.89983875  | 1.52383435  |
| H | 8.78954442  | 1.71316908  | -0.14972258 |
| H | 8.08484995  | 2.98694781  | 0.81669350  |

#### TS22-HCOOH

|   |             |             |             |
|---|-------------|-------------|-------------|
| C | 0.41426199  | 0.79342340  | -1.06374299 |
| C | -0.87532476 | 1.18605268  | -0.71637059 |
| C | -1.69561313 | 0.34507238  | 0.03264716  |
| C | -1.20456374 | -0.90371069 | 0.41741072  |

|   |             |             |             |
|---|-------------|-------------|-------------|
| C | 0.08032006  | -1.29653537 | 0.06188405  |
| C | 0.91091300  | -0.44976800 | -0.67563200 |
| H | 1.04283719  | 1.46189345  | -1.64136181 |
| H | -1.24613028 | 2.15581810  | -1.03126712 |
| H | -1.83261690 | -1.57873611 | 0.99109451  |
| H | 0.44233240  | -2.27561175 | 0.35961570  |
| C | 2.31140500  | -0.87412100 | -1.04391000 |
| H | 2.29794900  | -1.93001800 | -1.34454800 |
| H | 2.66791000  | -0.30948400 | -1.90898500 |
| C | 3.34610100  | -0.78097900 | 0.05459700  |
| C | 4.69518711  | -0.74487868 | -0.29638659 |
| H | 5.44345816  | 0.24044900  | -0.09164299 |
| H | 5.41670224  | -1.10467584 | 0.43220446  |
| H | 4.95198006  | -0.90653844 | -1.34034755 |
| C | 3.27514384  | -1.87472673 | 1.07104395  |
| H | 2.39053773  | -1.77937391 | 1.70157423  |
| H | 3.20482512  | -2.83390155 | 0.54424749  |
| H | 4.17049689  | -1.88892691 | 1.69250450  |
| C | -3.09297535 | 0.78127640  | 0.44439809  |
| H | -3.31591588 | 1.72268359  | -0.06341992 |
| C | -3.21675497 | 0.95463998  | 1.95724591  |
| H | -2.50317796 | 1.70637377  | 2.29694886  |
| H | -4.22321823 | 1.27494653  | 2.23114735  |
| H | -3.00409624 | 0.01568944  | 2.47047462  |
| C | -4.08677844 | -0.24040976 | -0.06990584 |
| O | -4.64516429 | -1.07079626 | 0.60092061  |
| O | -4.26410443 | -0.14299404 | -1.39492289 |
| H | -4.87332113 | -0.84070017 | -1.67796436 |
| O | 3.87507072  | 1.27009033  | 1.38905930  |
| O | 3.20939288  | 0.51294776  | 0.62108552  |
| O | 6.17144993  | 1.23778159  | 0.33641669  |
| H | 5.01440485  | 1.32490547  | 0.91763873  |
| C | 7.30827177  | 1.90049798  | -0.22335387 |

|   |            |            |             |
|---|------------|------------|-------------|
| H | 8.20335785 | 1.47806733 | 0.18318427  |
| O | 7.13258609 | 2.81396912 | -1.04842875 |

TS22-CH<sub>3</sub>COOH

|   |             |             |             |
|---|-------------|-------------|-------------|
| C | 0.38440390  | 0.75642527  | -1.13465615 |
| C | -0.90505594 | 1.14959837  | -0.78742774 |
| C | -1.69525913 | 0.34657795  | 0.03225854  |
| C | -1.17431382 | -0.86550989 | 0.48842814  |
| C | 0.11028938  | -1.25949799 | 0.13317496  |
| C | 0.91091300  | -0.44976800 | -0.67563200 |
| H | 0.98941947  | 1.39550802  | -1.76800588 |
| H | -1.29939513 | 2.08997486  | -1.15795464 |
| H | -1.77876572 | -1.51138510 | 1.11827437  |
| H | 0.49567235  | -2.21045032 | 0.48737443  |
| C | 2.31140500  | -0.87412100 | -1.04391000 |
| H | 2.29794900  | -1.93001800 | -1.34454800 |
| H | 2.66791000  | -0.30948400 | -1.90898500 |
| C | 3.34610100  | -0.78097900 | 0.05459700  |
| C | 4.68835351  | -0.64568267 | -0.29836073 |
| H | 5.46489502  | 0.26560561  | -0.08577443 |
| H | 5.43464021  | -1.00200451 | 0.40660303  |
| H | 4.94727411  | -0.73370461 | -1.35056948 |
| C | 3.34645833  | -1.93170269 | 1.00870301  |
| H | 2.46198480  | -1.92399446 | 1.64653976  |
| H | 3.32926131  | -2.86265818 | 0.42947791  |
| H | 4.24520669  | -1.92733534 | 1.62539115  |
| C | -3.09198962 | 0.78569249  | 0.44305814  |
| H | -3.34176244 | 1.68744646  | -0.12110710 |
| C | -3.18938212 | 1.05700554  | 1.94338769  |
| H | -2.48302627 | 1.84147564  | 2.21790913  |
| H | -4.19594275 | 1.37788938  | 2.21625367  |
| H | -2.94982645 | 0.15788946  | 2.51300064  |

|   |             |             |             |
|---|-------------|-------------|-------------|
| C | -4.07699503 | -0.28437985 | 0.01796372  |
| O | -4.60710322 | -1.07763626 | 0.75354118  |
| O | -4.28183649 | -0.27812218 | -1.30665145 |
| H | -4.88374146 | -1.00318238 | -1.53036871 |
| O | 3.76219439  | 1.22061869  | 1.49957346  |
| O | 3.13718012  | 0.46917067  | 0.69281537  |
| O | 6.10336623  | 1.29739111  | 0.33798236  |
| H | 4.92618497  | 1.31755833  | 0.95863680  |
| C | 7.24012696  | 1.96185143  | -0.21984156 |
| O | 7.07076017  | 2.99820811  | -0.88566679 |
| C | 8.54961425  | 1.22888158  | 0.12598826  |
| H | 8.66750769  | 1.19159856  | 1.18881991  |
| H | 8.51475014  | 0.23315099  | -0.26414643 |
| H | 9.37642312  | 1.75262419  | -0.30642446 |

### TS23

|   |             |             |             |
|---|-------------|-------------|-------------|
| C | 0.45631800  | 0.90026900  | -1.20981500 |
| C | -0.85269200 | 1.23376600  | -0.86490100 |
| C | -1.61523000 | 0.37491000  | -0.08084500 |
| C | -1.04975100 | -0.83585000 | 0.32829300  |
| C | 0.25257800  | -1.16730900 | -0.02030500 |
| C | 1.03996500  | -0.28987500 | -0.77309700 |
| H | 1.01913900  | 1.56767900  | -1.85720700 |
| H | -1.28048100 | 2.16563300  | -1.21917500 |
| H | -1.63831400 | -1.53323200 | 0.91707100  |
| H | 0.65421100  | -2.12658500 | 0.28542400  |
| C | 2.46259600  | -0.62352100 | -1.16150800 |
| H | 2.47509200  | -1.61118900 | -1.63872000 |
| H | 2.80419600  | 0.09025600  | -1.91454100 |
| C | 3.49453700  | -0.67921500 | -0.04424500 |
| C | 4.78416200  | -0.29624300 | -0.34665800 |
| H | 2.06918000  | 2.04257000  | -0.03860600 |

|   |             |             |             |
|---|-------------|-------------|-------------|
| H | 5.59515100  | -0.49510100 | 0.34312800  |
| H | 5.00229100  | 0.28748900  | -1.23299300 |
| C | 3.26281800  | -1.64088800 | 1.08994900  |
| H | 2.37131400  | -1.36906300 | 1.65695600  |
| H | 3.12219100  | -2.65202100 | 0.69714200  |
| H | 4.11741100  | -1.64656600 | 1.76687900  |
| C | -3.03124700 | 0.74242000  | 0.33251200  |
| H | -3.31024400 | 1.65674400  | -0.19663300 |
| C | -3.15242900 | 0.94728000  | 1.84136800  |
| H | -2.47899500 | 1.74540400  | 2.15606200  |
| H | -4.17306800 | 1.21904000  | 2.11535800  |
| H | -2.88493200 | 0.03499800  | 2.37657300  |
| C | -3.97153900 | -0.34515200 | -0.14747200 |
| O | -4.47981400 | -1.18626700 | 0.54897100  |
| O | -4.16195900 | -0.29143700 | -1.47298800 |
| H | -4.73424800 | -1.02779600 | -1.73437700 |
| O | 2.95802800  | 2.05944100  | 0.34975600  |
| O | 3.03244500  | 0.88428800  | 1.05651100  |

#### TS24

|   |             |             |             |
|---|-------------|-------------|-------------|
| C | 0.87201100  | 1.08285800  | -0.05532600 |
| C | -0.43357600 | 0.90335600  | 0.35750400  |
| C | -1.11307600 | -0.30443300 | 0.26696100  |
| C | -0.40471000 | -1.38186400 | -0.26973900 |
| C | 0.91579000  | -1.22982600 | -0.68442700 |
| C | 1.57699700  | -0.00566200 | -0.58389100 |
| H | 1.35018900  | 2.05351700  | 0.03054300  |
| H | -1.01264000 | 1.85585800  | 0.81755700  |
| H | -0.88305300 | -2.34985700 | -0.36799200 |
| H | 1.44379300  | -2.08392800 | -1.09562400 |
| C | 3.02035000  | 0.15079300  | -0.98743000 |
| H | 3.31425700  | -0.68972400 | -1.62551700 |

|   |             |             |             |
|---|-------------|-------------|-------------|
| H | 3.13371500  | 1.06426000  | -1.57991100 |
| C | 3.98147900  | 0.21777400  | 0.21419500  |
| H | 3.67776700  | 1.06796300  | 0.83718900  |
| C | 5.40764100  | 0.46133100  | -0.27676500 |
| H | 5.47405400  | 1.38030600  | -0.86445600 |
| H | 6.10170400  | 0.54186400  | 0.56316300  |
| H | 5.73854300  | -0.36962200 | -0.90808200 |
| C | 3.90951400  | -1.05342700 | 1.05901800  |
| H | 2.91009500  | -1.21048300 | 1.47128700  |
| H | 4.16582500  | -1.92765500 | 0.45071700  |
| H | 4.61565400  | -1.00343400 | 1.89122600  |
| C | -2.56767300 | -0.42450000 | 0.70355500  |
| H | -2.75774000 | 0.37305600  | 1.42635300  |
| C | -2.92638600 | -1.77456500 | 1.31412700  |
| H | -2.25654000 | -1.99286800 | 2.14646300  |
| H | -3.95200600 | -1.75758700 | 1.68492700  |
| H | -2.85055200 | -2.57691100 | 0.58048000  |
| C | -3.43575600 | -0.13129000 | -0.50684000 |
| O | -4.02853700 | -0.94602000 | -1.16055100 |
| O | -3.45249600 | 1.18290300  | -0.80368500 |
| H | -3.97451000 | 1.32151600  | -1.60811800 |
| O | -1.83824900 | 2.84378500  | 1.02541000  |
| H | -2.49993200 | 2.59511800  | 0.35473600  |

#### TS25

|   |             |             |             |
|---|-------------|-------------|-------------|
| C | 0.77818500  | 0.98598500  | 0.20879700  |
| C | -0.53069600 | 1.08211600  | 0.64542200  |
| C | -1.42823600 | 0.06643500  | 0.30876200  |
| C | -0.97255500 | -0.99944800 | -0.46868300 |
| C | 0.34728400  | -1.05740300 | -0.90386200 |
| C | 1.26274600  | -0.05210900 | -0.57540800 |
| H | 1.54570700  | 1.84099700  | 0.53366000  |



|   |             |             |             |
|---|-------------|-------------|-------------|
| H | -0.85483000 | 1.92720700  | 1.24314800  |
| H | -1.65899300 | -1.79420600 | -0.74460700 |
| H | 0.67842100  | -1.89469800 | -1.50993800 |
| C | 2.70703100  | -0.10515800 | -0.99968300 |
| H | 2.83122200  | -0.86903000 | -1.77446200 |
| H | 2.98878300  | 0.85643000  | -1.44015700 |
| C | 3.66394500  | -0.41473900 | 0.16600800  |
| H | 3.50950200  | 0.35329400  | 0.93311100  |
| C | 5.11081000  | -0.33302600 | -0.31711600 |
| H | 5.33418600  | 0.65264300  | -0.73336100 |
| H | 5.80801000  | -0.52409700 | 0.50210500  |
| H | 5.29437500  | -1.07980700 | -1.09641700 |
| C | 3.37081400  | -1.78366200 | 0.77762900  |
| H | 2.35352500  | -1.84084700 | 1.17206700  |
| H | 3.48561400  | -2.56853700 | 0.02219100  |
| H | 4.06393400  | -1.99831400 | 1.59447300  |
| C | -2.86792500 | 0.10950400  | 0.79638500  |
| H | -3.03121200 | 1.07418000  | 1.28275900  |
| C | -3.18073200 | -1.02890500 | 1.76554100  |
| H | -2.51368400 | -0.96877500 | 2.62633800  |
| H | -4.21259900 | -0.96756300 | 2.11486900  |
| H | -3.03935300 | -1.99676800 | 1.28229400  |
| C | -3.78376100 | 0.06721700  | -0.41088100 |
| O | -4.42215600 | -0.88934200 | -0.76905400 |
| O | -3.78672200 | 1.23031500  | -1.07629500 |
| H | -4.35122500 | 1.13823100  | -1.85784800 |
| O | 2.31888400  | 2.91833800  | 0.60747000  |
| H | 2.02711100  | 3.36433300  | -0.20465700 |

TS26

|   |             |             |             |
|---|-------------|-------------|-------------|
| C | -0.69003100 | -1.53472900 | -0.60724400 |
| C | 0.64793200  | -1.67580100 | -0.25329800 |

|   |             |             |             |
|---|-------------|-------------|-------------|
| C | 1.40161600  | -0.57752800 | 0.15932900  |
| C | 0.78789400  | 0.67783000  | 0.20441500  |
| C | -0.54491300 | 0.78177000  | -0.14838100 |
| C | -1.32406400 | -0.28833500 | -0.56747100 |
| H | -1.25640000 | -2.40416000 | -0.92747000 |
| H | 1.11419100  | -2.65396000 | -0.30311300 |
| H | 1.34723600  | 1.55636700  | 0.51123000  |
| H | -1.06090900 | 1.85610300  | -0.06426200 |
| C | -2.78323000 | -0.14322400 | -0.91197400 |
| H | -3.00542200 | 0.90782900  | -1.12320000 |
| H | -2.99588700 | -0.71308400 | -1.82174500 |
| C | -3.71862300 | -0.63053700 | 0.21029700  |
| H | -3.48518900 | -1.68412200 | 0.40653300  |
| C | -5.17143700 | -0.53165600 | -0.25226900 |
| H | -5.33771900 | -1.10596200 | -1.16709700 |
| H | -5.85284700 | -0.90623900 | 0.51516800  |
| H | -5.43357900 | 0.51176400  | -0.45535200 |
| C | -3.50630900 | 0.16265300  | 1.49882100  |
| H | -2.48886200 | 0.05160200  | 1.88073200  |
| H | -3.68666600 | 1.22834200  | 1.32169900  |
| H | -4.19777500 | -0.17257500 | 2.27558300  |
| C | 2.85813500  | -0.73287100 | 0.56853900  |
| H | 3.15042600  | -1.76895300 | 0.38303400  |
| C | 3.08746400  | -0.37304900 | 2.03528800  |
| H | 2.47358300  | -1.01482600 | 2.66843700  |
| H | 4.13539200  | -0.50858800 | 2.30744500  |
| H | 2.81595200  | 0.66635700  | 2.22483200  |
| C | 3.70012600  | 0.13574200  | -0.34474900 |
| O | 4.15708800  | 1.21191000  | -0.05542800 |
| O | 3.85840200  | -0.41660700 | -1.55527800 |
| H | 4.36005600  | 0.19687400  | -2.11213100 |
| O | -1.50155400 | 3.09308000  | -0.25310900 |
| H | -1.17442400 | 3.22856000  | -1.15762400 |

## TS27

|   |             |             |             |
|---|-------------|-------------|-------------|
| C | -1.07051700 | -1.53995000 | 0.08823600  |
| C | 0.24940900  | -1.58709900 | 0.52274900  |
| C | 1.09001500  | -0.47731500 | 0.39507200  |
| C | 0.53874700  | 0.65695400  | -0.18737500 |
| C | -0.76666400 | 0.72307400  | -0.63857700 |
| C | -1.60264100 | -0.38967500 | -0.49735600 |
| H | -1.69938800 | -2.41765600 | 0.20004400  |
| H | 0.63999800  | -2.49661800 | 0.96753100  |
| H | 1.18158000  | 1.67134800  | -0.32528300 |
| H | -1.14384800 | 1.63340400  | -1.09340600 |
| C | -3.04679200 | -0.34343500 | -0.92446400 |
| H | -3.19359200 | 0.47166400  | -1.64141300 |
| H | -3.29877700 | -1.27623900 | -1.43875300 |
| C | -4.02041500 | -0.14749400 | 0.25288100  |
| H | -3.85260900 | -0.96572700 | 0.96384500  |
| C | -5.46104200 | -0.22799100 | -0.24959900 |
| H | -5.65574400 | -1.18268000 | -0.74453600 |
| H | -6.16988800 | -0.11919900 | 0.57457400  |
| H | -5.65679900 | 0.57302200  | -0.96980000 |
| C | -3.77030500 | 1.17782100  | 0.97051400  |
| H | -2.76097800 | 1.23074100  | 1.38489800  |
| H | -3.89431000 | 2.01438700  | 0.27438200  |
| H | -4.48103600 | 1.31293800  | 1.78922900  |
| C | 2.52921800  | -0.53426400 | 0.88426800  |
| H | 2.68908100  | -1.52055600 | 1.32250300  |
| C | 2.84839300  | 0.55234100  | 1.91195500  |
| H | 2.18407900  | 0.44150200  | 2.76965300  |
| H | 3.88051700  | 0.46461400  | 2.25509900  |
| H | 2.70671300  | 1.54716600  | 1.48948200  |
| C | 3.43701400  | -0.43419400 | -0.32501800 |

|   |            |             |             |
|---|------------|-------------|-------------|
| O | 3.85268400 | 0.59924500  | -0.79744700 |
| O | 3.71277800 | -1.62394500 | -0.85664500 |
| H | 4.24957300 | -1.49415700 | -1.65336300 |
| O | 1.91059400 | 2.69310800  | -0.66542800 |
| H | 2.74045800 | 2.19215100  | -0.78823700 |

TS28

|   |             |             |             |
|---|-------------|-------------|-------------|
| C | -1.28374900 | -0.12992200 | 1.37697600  |
| C | -0.00418200 | 0.39950700  | 1.50931500  |
| C | 0.82956400  | 0.52252500  | 0.39867500  |
| C | 0.36112800  | 0.09311300  | -0.84377800 |
| C | -0.91770500 | -0.43890100 | -0.96993200 |
| C | -1.76163500 | -0.55657000 | 0.13600900  |
| H | -1.91975700 | -0.21607100 | 2.25274400  |
| H | 0.34873300  | 0.72146700  | 2.48335700  |
| H | 0.99902900  | 0.16789900  | -1.71918100 |
| H | -1.26736400 | -0.76758000 | -1.94332800 |
| C | -3.16584800 | -1.08863600 | 0.00093600  |
| H | -3.27578100 | -1.59609500 | -0.96388000 |
| H | -3.34781000 | -1.83495500 | 0.78122700  |
| C | -4.24147000 | 0.00857000  | 0.10536900  |
| H | -4.12143300 | 0.50059000  | 1.07827300  |
| C | -5.63305600 | -0.61942500 | 0.04729100  |
| H | -5.76693700 | -1.36421700 | 0.83580900  |
| H | -6.41025500 | 0.14043900  | 0.15898700  |
| H | -5.78454700 | -1.11620700 | -0.91657900 |
| C | -4.07524300 | 1.05830300  | -0.99224200 |
| H | -3.10215500 | 1.55136000  | -0.93414400 |
| H | -4.15961700 | 0.59090600  | -1.97934700 |
| H | -4.85040000 | 1.82454000  | -0.91451900 |
| C | 2.22097100  | 1.11954800  | 0.53901600  |
| H | 2.39636200  | 1.33606600  | 1.59509100  |

|   |            |             |             |
|---|------------|-------------|-------------|
| C | 2.41021000 | 2.38347100  | -0.29878100 |
| H | 1.69480300 | 3.13884200  | 0.02858600  |
| H | 3.41892100 | 2.78212200  | -0.18027200 |
| H | 2.24067000 | 2.18041000  | -1.35674400 |
| C | 3.21519500 | 0.02866900  | 0.18056500  |
| O | 3.70060000 | -0.00467400 | -0.97759100 |
| O | 3.50361700 | -0.85356700 | 1.04471500  |
| H | 4.22272200 | -1.51571800 | 0.37093400  |
| O | 4.87441300 | -1.76223700 | -0.63421400 |
| H | 4.33069800 | -2.24149300 | -1.27681200 |

TS29

|   |             |             |             |
|---|-------------|-------------|-------------|
| C | 0.74011100  | -0.74328400 | -1.06980800 |
| C | -0.55787900 | -0.28739700 | -1.19491600 |
| C | -1.21363800 | 0.36014700  | -0.11424100 |
| C | -0.52625700 | 0.41802400  | 1.12613200  |
| C | 0.76952500  | -0.04198200 | 1.23749400  |
| C | 1.43037900  | -0.62620700 | 0.14427200  |
| H | 1.23345400  | -1.20340800 | -1.91907500 |
| H | -1.08772900 | -0.39199100 | -2.13530000 |
| H | -1.01630400 | 0.85808400  | 1.98585300  |
| H | 1.28630000  | 0.03625400  | 2.18857400  |
| C | 2.85533300  | -1.08293600 | 0.28115200  |
| H | 2.95730900  | -1.66962600 | 1.20005000  |
| H | 3.11758900  | -1.73562800 | -0.55799700 |
| C | 3.86000000  | 0.08644100  | 0.33077800  |
| H | 3.58504100  | 0.72589700  | 1.17801000  |
| C | 3.80708400  | 0.92141800  | -0.94759200 |
| H | 2.82066800  | 1.36491700  | -1.10281200 |
| H | 4.53903600  | 1.73148500  | -0.90891700 |
| H | 4.03788700  | 0.29800800  | -1.81805500 |
| C | 5.26921800  | -0.45430000 | 0.56624000  |

|   |             |             |             |
|---|-------------|-------------|-------------|
| H | 5.32167100  | -1.03924600 | 1.48772200  |
| H | 5.57120700  | -1.10059400 | -0.26406200 |
| H | 5.99236200  | 0.36153900  | 0.63727600  |
| C | -2.72339100 | 0.56400000  | -0.18212100 |
| H | -2.95487000 | 0.87887500  | -1.20122400 |
| C | -3.27193600 | 1.57021800  | 0.82298400  |
| H | -2.71957900 | 2.50498600  | 0.74018800  |
| H | -4.32697500 | 1.76045000  | 0.62011400  |
| H | -3.19428900 | 1.19119400  | 1.84226300  |
| C | -3.36273800 | -0.79936900 | 0.02987200  |
| O | -3.74636400 | -1.22850100 | 1.08765400  |
| O | -3.43164400 | -1.50728300 | -1.10551500 |
| H | -3.79680300 | -2.38158900 | -0.90316800 |
| O | -0.81712800 | 2.27537500  | -0.77649500 |
| H | 0.14023800  | 2.18502500  | -0.89607400 |

### TS30

|   |             |             |             |
|---|-------------|-------------|-------------|
| C | -1.06453900 | -0.84500700 | 1.09434700  |
| C | 0.26908400  | -0.59045900 | 1.34252900  |
| C | 1.12198300  | -0.09486200 | 0.32359500  |
| C | 0.53369700  | 0.22010000  | -0.92703700 |
| C | -0.80148600 | -0.04683600 | -1.16428600 |
| C | -1.62495300 | -0.58485600 | -0.16509300 |
| H | -1.68999100 | -1.25392200 | 1.88108300  |
| H | 0.69177300  | -0.79543000 | 2.32036100  |
| H | 1.15423200  | 0.64741100  | -1.70489300 |
| H | -1.22726000 | 0.17337000  | -2.13756800 |
| C | -3.08790300 | -0.83194300 | -0.40653800 |
| H | -3.28989800 | -0.83664600 | -1.48276000 |
| H | -3.35582800 | -1.81980800 | -0.01810500 |
| C | -3.99328300 | 0.22263800  | 0.26165100  |
| H | -3.78388900 | 0.20875100  | 1.33795800  |

|   |             |             |             |
|---|-------------|-------------|-------------|
| C | -5.45994500 | -0.14690200 | 0.04749900  |
| H | -5.68146300 | -1.13967000 | 0.44681400  |
| H | -6.11877000 | 0.57390700  | 0.53739000  |
| H | -5.69914100 | -0.14958800 | -1.02074000 |
| C | -3.70240700 | 1.62454200  | -0.27171100 |
| H | -2.67354000 | 1.93070500  | -0.06812000 |
| H | -3.85675100 | 1.65746000  | -1.35558800 |
| H | -4.37117400 | 2.35742400  | 0.18588600  |
| C | 2.47823200  | 0.45136700  | 0.72949300  |
| H | 2.78684800  | -0.06444800 | 1.63935200  |
| C | 2.39118800  | 1.96279700  | 0.99388600  |
| H | 1.64256500  | 2.15826300  | 1.76323300  |
| H | 3.35169000  | 2.35319900  | 1.33574100  |
| H | 2.10206500  | 2.48861100  | 0.08204300  |
| C | 3.53879200  | 0.19655500  | -0.32046300 |
| O | 3.51070300  | 0.61617700  | -1.45076500 |
| O | 4.57612700  | -0.49856100 | 0.16085600  |
| H | 5.23048600  | -0.59626000 | -0.54688400 |
| O | 1.92301200  | -1.96370400 | -0.19141700 |
| H | 1.11855700  | -2.34743200 | -0.57183100 |

### TS31

|   |             |             |             |
|---|-------------|-------------|-------------|
| C | -0.84657900 | 0.21281200  | 1.29232000  |
| C | 0.48590100  | 0.65822000  | 1.12411800  |
| C | 1.26295800  | 0.15566600  | 0.05175200  |
| C | 0.66259700  | -0.69317100 | -0.86970400 |
| C | -0.66850600 | -1.07295500 | -0.71720700 |
| C | -1.44292500 | -0.62593400 | 0.36836300  |
| H | -1.41267700 | 0.56741500  | 2.14714500  |
| H | 0.98536800  | 1.15299600  | 1.94740600  |
| H | 1.23337200  | -1.07328500 | -1.71032400 |
| H | -1.11724700 | -1.74040400 | -1.44641300 |

|   |             |             |             |
|---|-------------|-------------|-------------|
| C | -2.88810800 | -1.03453600 | 0.48310100  |
| H | -2.98033700 | -2.10263400 | 0.26183900  |
| H | -3.23290900 | -0.88455600 | 1.51186200  |
| C | -3.81181800 | -0.24972200 | -0.46724100 |
| H | -3.43661100 | -0.38991700 | -1.48852900 |
| C | -3.80310000 | 1.24428600  | -0.14707200 |
| H | -2.80435400 | 1.67675600  | -0.24277000 |
| H | -4.47225300 | 1.78700800  | -0.81901300 |
| H | -4.14612800 | 1.41300800  | 0.87948600  |
| C | -5.23134400 | -0.80965700 | -0.39076600 |
| H | -5.25344100 | -1.87236500 | -0.64476300 |
| H | -5.63101600 | -0.69501900 | 0.62199500  |
| H | -5.89760100 | -0.28031600 | -1.07607600 |
| C | 2.70655700  | 0.59252600  | -0.10319800 |
| H | 2.92670100  | 1.29976100  | 0.69979300  |
| C | 2.98356900  | 1.23712600  | -1.45958700 |
| H | 2.32179300  | 2.09379500  | -1.58968600 |
| H | 4.01916100  | 1.57554800  | -1.51748300 |
| H | 2.81168500  | 0.52974200  | -2.27142100 |
| C | 3.58847000  | -0.62197200 | 0.12029800  |
| O | 4.16617400  | -1.23302000 | -0.74121100 |
| O | 3.63230000  | -0.97187600 | 1.41320300  |
| H | 4.16865800  | -1.77371700 | 1.50042600  |
| O | 0.22022900  | 2.51970300  | 0.32983100  |
| H | -0.21782500 | 2.24158900  | -0.48912800 |

TS32

|   |             |             |             |
|---|-------------|-------------|-------------|
| C | -0.91735200 | -0.99818700 | 0.70985200  |
| C | 0.43127800  | -0.71094900 | 1.01961600  |
| C | 1.10835600  | 0.32900000  | 0.33022700  |
| C | 0.45301000  | 0.97372200  | -0.70839100 |
| C | -0.86053400 | 0.63649700  | -1.03454700 |



|   |             |             |             |
|---|-------------|-------------|-------------|
| C | -1.56664100 | -0.35090200 | -0.32810100 |
| H | -1.43610500 | -1.75905200 | 1.28408600  |
| H | 0.84870100  | -1.08711900 | 1.94518400  |
| H | 0.96017100  | 1.74141500  | -1.27978500 |
| H | -1.35401700 | 1.15356000  | -1.85137600 |
| C | -3.00898300 | -0.65539700 | -0.64244300 |
| H | -3.24420900 | -0.31877100 | -1.65804400 |
| H | -3.16371900 | -1.73837800 | -0.61597400 |
| C | -3.99307600 | 0.00985800  | 0.33803900  |
| H | -3.73643200 | -0.33271300 | 1.34797800  |
| C | -5.42041800 | -0.43374500 | 0.02230500  |
| H | -5.51715200 | -1.52145900 | 0.06624300  |
| H | -6.13062200 | 0.00083100  | 0.72985400  |
| H | -5.70618000 | -0.10879300 | -0.98334600 |
| C | -3.87898700 | 1.53304200  | 0.29914300  |
| H | -2.87927300 | 1.87242600  | 0.57991300  |
| H | -4.09150600 | 1.90338800  | -0.70966200 |
| H | -4.59664800 | 1.99067500  | 0.98427200  |
| C | 2.54904500  | 0.60604600  | 0.68106800  |
| H | 2.75392800  | 0.18928000  | 1.66839100  |
| C | 2.91259300  | 2.09985900  | 0.68028900  |
| H | 2.26279200  | 2.63742700  | 1.37151800  |
| H | 3.94781000  | 2.23681200  | 0.99705200  |
| H | 2.79891400  | 2.53161200  | -0.31493800 |
| C | 3.46582600  | -0.09825400 | -0.30557200 |
| O | 3.34309500  | -0.07420500 | -1.50322400 |
| O | 4.49239100  | -0.70110900 | 0.30672700  |
| H | 5.06739300  | -1.08965000 | -0.36927900 |
| O | 1.46450700  | -2.21440600 | 0.10180900  |
| H | 1.17150100  | -2.02727300 | -0.80349200 |

TS33

|   |             |             |             |
|---|-------------|-------------|-------------|
| C | 0.79360900  | 0.17671400  | -1.27252200 |
| C | -0.57908200 | 0.52174100  | -1.29222100 |
| C | -1.39649500 | 0.23170200  | -0.21452300 |
| C | -0.85239400 | -0.47067300 | 0.87074000  |
| C | 0.47474500  | -0.89829900 | 0.85928200  |
| C | 1.31059500  | -0.61689300 | -0.21415100 |
| H | 1.37082300  | 0.26677300  | -2.18485500 |
| H | -0.97172500 | 1.06057100  | -2.14738400 |
| H | -1.48009000 | -0.70894400 | 1.72433000  |
| H | 0.85564700  | -1.47754000 | 1.69364800  |
| C | 2.72726100  | -1.11700900 | -0.26599500 |
| H | 2.84970500  | -1.92707900 | 0.46133000  |
| H | 2.91459500  | -1.54094900 | -1.25860500 |
| C | 3.79272000  | -0.04008400 | 0.01763800  |
| H | 3.65445900  | 0.76643100  | -0.70798600 |
| C | 5.18566300  | -0.64232200 | -0.16030200 |
| H | 5.31799900  | -1.04939100 | -1.16599400 |
| H | 5.95967200  | 0.11072200  | 0.00696000  |
| H | 5.34583500  | -1.45398900 | 0.55692200  |
| C | 3.62778900  | 0.54138300  | 1.41966400  |
| H | 2.64762400  | 1.00610900  | 1.54456500  |
| H | 3.73339900  | -0.24563400 | 2.17462100  |
| H | 4.39045300  | 1.29965800  | 1.61493700  |
| C | -2.84765700 | 0.68230100  | -0.18732300 |
| H | -3.09046600 | 1.09375900  | -1.17008600 |
| C | -3.10049800 | 1.72627000  | 0.89883100  |
| H | -2.46053100 | 2.59271800  | 0.72626100  |
| H | -4.14232700 | 2.05039400  | 0.89063500  |
| H | -2.87679400 | 1.31805600  | 1.88567200  |
| C | -3.72963800 | -0.53507700 | 0.00814800  |
| O | -4.28791100 | -0.83503800 | 1.03230700  |
| O | -3.80253500 | -1.28214200 | -1.10186100 |
| H | -4.34376700 | -2.06345400 | -0.91530800 |

|   |            |            |             |
|---|------------|------------|-------------|
| O | 1.46214700 | 2.04178400 | -0.75203700 |
| H | 0.91217900 | 2.14643100 | 0.03946100  |

TS34

|   |             |             |             |
|---|-------------|-------------|-------------|
| C | 0.84820900  | 0.83623400  | 0.86718400  |
| C | -0.48314100 | 0.53425600  | 1.23546200  |
| C | -1.29931100 | -0.19692100 | 0.39264900  |
| C | -0.76605600 | -0.67477500 | -0.81589100 |
| C | 0.56281300  | -0.43947300 | -1.15869700 |
| C | 1.39965800  | 0.28620000  | -0.31879300 |
| H | 1.51529400  | 1.26152700  | 1.60690800  |
| H | -0.87024700 | 0.91744900  | 2.17325800  |
| H | -1.39786400 | -1.24261500 | -1.49221300 |
| H | 0.95466100  | -0.83648400 | -2.08904600 |
| C | 2.85096500  | 0.50695300  | -0.62782900 |
| H | 3.04701500  | 0.26686900  | -1.67814400 |
| H | 3.08112400  | 1.56740800  | -0.48107700 |
| C | 3.79120400  | -0.33605600 | 0.25674900  |
| H | 3.57983800  | -0.08875500 | 1.30410200  |
| C | 5.24441200  | 0.02789400  | -0.04187000 |
| H | 5.43065500  | 1.09099200  | 0.12872300  |
| H | 5.92684600  | -0.54541100 | 0.59003200  |
| H | 5.48485000  | -0.19541400 | -1.08636100 |
| C | 3.55314500  | -1.83164600 | 0.05418600  |
| H | 2.53005800  | -2.11699000 | 0.31064100  |
| H | 3.72778300  | -2.10464600 | -0.99223900 |
| H | 4.23444000  | -2.41945400 | 0.67390100  |
| C | -2.74145000 | -0.50118700 | 0.76440800  |
| H | -2.96418200 | 0.02002900  | 1.69847200  |
| C | -2.99784900 | -1.99845200 | 0.92068800  |
| H | -2.34676600 | -2.40055000 | 1.69775100  |
| H | -4.03611000 | -2.18537600 | 1.19888300  |

|   |             |             |             |
|---|-------------|-------------|-------------|
| H | -2.79479700 | -2.52657000 | -0.01195300 |
| C | -3.63951700 | 0.10012800  | -0.29881200 |
| O | -4.20768300 | -0.51728300 | -1.16290800 |
| O | -3.71104000 | 1.43427800  | -0.19511800 |
| H | -4.25838500 | 1.77280400  | -0.91885200 |
| O | 0.58868200  | 2.75014200  | 0.16212300  |
| H | -0.14238100 | 2.54916900  | -0.44217300 |

TS35

|   |             |             |             |
|---|-------------|-------------|-------------|
| C | -0.56873400 | 0.57744800  | 1.53109100  |
| C | 0.79869500  | 0.77689500  | 1.43693500  |
| C | 1.49694900  | 0.36182600  | 0.30227200  |
| C | 0.79704600  | -0.29129300 | -0.72884500 |
| C | -0.56052200 | -0.49945900 | -0.63792100 |
| C | -1.31432600 | -0.00270500 | 0.46710500  |
| H | -1.10178000 | 0.89751600  | 2.41918400  |
| H | 1.33203500  | 1.25183300  | 2.25264500  |
| H | 1.33882200  | -0.65830500 | -1.59498200 |
| H | -1.07170700 | -1.04818900 | -1.41890500 |
| C | -2.71049200 | -0.52862300 | 0.74434400  |
| H | -2.65083000 | -1.62394800 | 0.69720500  |
| H | -2.96228400 | -0.28084400 | 1.77949000  |
| C | -3.88002800 | -0.07851500 | -0.14720400 |
| H | -3.99425000 | 1.00062600  | -0.02507400 |
| C | -5.15512100 | -0.76533900 | 0.34669100  |
| H | -5.33730300 | -0.55795800 | 1.40434000  |
| H | -6.02374000 | -0.42331700 | -0.22097700 |
| H | -5.07973600 | -1.85072800 | 0.22349200  |
| C | -3.66381400 | -0.37025700 | -1.63075000 |
| H | -2.83000400 | 0.20785300  | -2.02999000 |
| H | -3.46714300 | -1.43598000 | -1.79338200 |
| H | -4.55994600 | -0.10827800 | -2.19945400 |

|   |             |             |             |
|---|-------------|-------------|-------------|
| C | 2.98736500  | 0.60955600  | 0.17090100  |
| H | 3.35228500  | 0.99885800  | 1.12423700  |
| C | 3.30148200  | 1.59264000  | -0.95683100 |
| H | 2.80014300  | 2.54176300  | -0.76392000 |
| H | 4.37584300  | 1.76865900  | -1.02497800 |
| H | 2.95538100  | 1.20296000  | -1.91512400 |
| C | 3.68266300  | -0.72033300 | -0.05462500 |
| O | 4.15244200  | -1.09400600 | -1.09820100 |
| O | 3.69530700  | -1.46820600 | 1.05673600  |
| H | 4.11660800  | -2.31684100 | 0.85517300  |
| O | -1.79389800 | 1.84752800  | -0.26545800 |
| H | -0.89018500 | 2.18074600  | -0.37258200 |

TS36

|   |             |             |             |
|---|-------------|-------------|-------------|
| C | -0.82408700 | -0.57177400 | 1.29129600  |
| C | 0.48504300  | -0.18322000 | 1.49980800  |
| C | 1.28277100  | 0.23554000  | 0.42779000  |
| C | 0.73597200  | 0.26008300  | -0.86269900 |
| C | -0.57054000 | -0.13167000 | -1.07773200 |
| C | -1.38360600 | -0.60273100 | -0.01249900 |
| H | -1.43901600 | -0.88582500 | 2.12839800  |
| H | 0.90028300  | -0.19612700 | 2.50137700  |
| H | 1.34299700  | 0.59114500  | -1.69952200 |
| H | -0.99025500 | -0.10619200 | -2.07759700 |
| C | -2.87637900 | -0.72009600 | -0.17850300 |
| H | -3.10282500 | -0.95319800 | -1.22435200 |
| H | -3.22988800 | -1.55880300 | 0.42691900  |
| C | -3.63332200 | 0.55444500  | 0.23398600  |
| H | -3.41666200 | 0.74482700  | 1.29237900  |
| C | -5.13641100 | 0.32214500  | 0.08287600  |
| H | -5.46574400 | -0.53793000 | 0.67122500  |
| H | -5.70250000 | 1.19769000  | 0.40928700  |

|   |             |             |             |
|---|-------------|-------------|-------------|
| H | -5.38662900 | 0.13059600  | -0.96558100 |
| C | -3.19242000 | 1.77417000  | -0.57506600 |
| H | -2.13970200 | 2.01498900  | -0.40821200 |
| H | -3.33212800 | 1.59132500  | -1.64607200 |
| H | -3.78550400 | 2.65048500  | -0.30254300 |
| C | 2.71170000  | 0.68973700  | 0.65758800  |
| H | 2.97419400  | 0.47232900  | 1.69606700  |
| C | 2.89094000  | 2.17990700  | 0.37019800  |
| H | 2.23007300  | 2.75925700  | 1.01591100  |
| H | 3.92161400  | 2.48488000  | 0.55664700  |
| H | 2.64898400  | 2.40465700  | -0.66959900 |
| C | 3.63347200  | -0.14831300 | -0.20874300 |
| O | 4.22609100  | 0.24401100  | -1.18018700 |
| O | 3.70073200  | -1.41587700 | 0.22025900  |
| H | 4.27368400  | -1.91649600 | -0.37915400 |
| O | -1.04703600 | -2.60723400 | -0.39574000 |
| H | -0.07807600 | -2.60415400 | -0.37002100 |

### TS37

|   |             |             |             |
|---|-------------|-------------|-------------|
| C | 0.73930300  | 1.00851700  | 1.17927200  |
| C | -0.60169400 | 0.69931500  | 1.42281200  |
| C | -1.38955100 | 0.08149300  | 0.44651600  |
| C | -0.80693700 | -0.24104200 | -0.76981800 |
| C | 0.57081300  | -0.01642500 | -0.99371700 |
| C | 1.33989900  | 0.69366200  | -0.02996300 |
| H | 1.31326700  | 1.52290300  | 1.94269500  |
| H | -1.04444900 | 0.95786000  | 2.37888800  |
| H | -1.39178600 | -0.71585800 | -1.55125100 |
| H | 0.96451000  | -0.11962400 | -1.99756000 |
| C | 2.76321500  | 1.07102300  | -0.33187600 |
| H | 2.80255600  | 1.52840800  | -1.32663000 |
| H | 3.09533200  | 1.82875900  | 0.38632600  |

|   |             |             |             |
|---|-------------|-------------|-------------|
| C | 3.75458300  | -0.10796300 | -0.29527300 |
| H | 3.40010100  | -0.86481800 | -1.00098900 |
| C | 3.80876400  | -0.73570400 | 1.09547300  |
| H | 2.82885400  | -1.10717200 | 1.40268000  |
| H | 4.51070800  | -1.57317900 | 1.11528600  |
| H | 4.14308500  | 0.00186600  | 1.83363200  |
| C | 5.13808400  | 0.37341200  | -0.72904600 |
| H | 5.11360800  | 0.80114400  | -1.73455500 |
| H | 5.50889100  | 1.14194200  | -0.04292900 |
| H | 5.85502000  | -0.45132300 | -0.72743000 |
| C | -2.84525500 | -0.26119400 | 0.72124200  |
| H | -3.13010600 | 0.20658700  | 1.66672400  |
| C | -3.06929700 | -1.77083300 | 0.78876000  |
| H | -2.44933400 | -2.19628000 | 1.57911600  |
| H | -4.11515600 | -1.99997800 | 0.99908000  |
| H | -2.79736400 | -2.24141200 | -0.15753900 |
| C | -3.70247100 | 0.37105100  | -0.35648000 |
| O | -4.21135800 | -0.21595700 | -1.27697500 |
| O | -3.81544600 | 1.69627300  | -0.19224400 |
| H | -4.33494900 | 2.05579000  | -0.92630000 |
| O | 1.12671200  | -1.94716500 | -0.65044600 |
| H | 0.73122100  | -2.03270000 | 0.23066200  |

### TS38

|   |             |             |             |
|---|-------------|-------------|-------------|
| C | -0.85448900 | 0.03791400  | 1.45502300  |
| C | 0.47692900  | 0.44301400  | 1.50778600  |
| C | 1.27761600  | 0.45365300  | 0.35534200  |
| C | 0.72444400  | 0.03445200  | -0.84159500 |
| C | -0.60415600 | -0.44618300 | -0.89420600 |
| C | -1.42670400 | -0.38426000 | 0.26059800  |
| H | -1.45579100 | 0.05522800  | 2.35818100  |
| H | 0.90239700  | 0.76379200  | 2.45290000  |

|   |             |             |             |
|---|-------------|-------------|-------------|
| H | 1.31872400  | 0.02756000  | -1.74976600 |
| H | -1.07017300 | -0.60174900 | -1.85937000 |
| C | -2.87702900 | -0.76458400 | 0.18643100  |
| H | -3.05833300 | -1.34236000 | -0.72573400 |
| H | -3.12703900 | -1.40690700 | 1.03684000  |
| C | -3.81506700 | 0.45908100  | 0.19940800  |
| H | -3.61582300 | 1.01940400  | 1.12070500  |
| C | -5.27038600 | -0.00416900 | 0.21637000  |
| H | -5.47366100 | -0.64497600 | 1.07793100  |
| H | -5.95056200 | 0.84987200  | 0.25776100  |
| H | -5.49904500 | -0.57286400 | -0.69058800 |
| C | -3.55078700 | 1.37650400  | -0.99382700 |
| H | -2.52744000 | 1.76033400  | -0.99138000 |
| H | -3.70641300 | 0.83402900  | -1.93255600 |
| H | -4.23110100 | 2.23129300  | -0.98273800 |
| C | 2.72127000  | 0.92772500  | 0.41602100  |
| H | 2.96153000  | 1.14431900  | 1.45969900  |
| C | 2.96581800  | 2.16309900  | -0.44730100 |
| H | 2.31804500  | 2.97511700  | -0.11516600 |
| H | 4.00459200  | 2.48775300  | -0.37166900 |
| H | 2.74992400  | 1.95083100  | -1.49535600 |
| C | 3.61291900  | -0.22226100 | -0.00952300 |
| O | 4.18610300  | -0.30739200 | -1.06515900 |
| O | 3.67280400  | -1.17924700 | 0.92687600  |
| H | 4.21652000  | -1.90727700 | 0.59189100  |
| O | -0.26547000 | -2.46185600 | -0.84899900 |
| H | 0.21387700  | -2.47934400 | -0.00648400 |

TS39

|   |             |             |            |
|---|-------------|-------------|------------|
| C | -0.82946000 | -1.03529700 | 1.10585000 |
| C | 0.50371200  | -0.70855900 | 1.37740000 |
| C | 1.27006400  | -0.03383200 | 0.44524900 |



|   |             |             |             |
|---|-------------|-------------|-------------|
| C | 0.66130300  | 0.36955200  | -0.77456500 |
| C | -0.65476400 | -0.05669100 | -1.06749300 |
| C | -1.42298900 | -0.72495400 | -0.12279300 |
| H | -1.41116100 | -1.55803900 | 1.85826200  |
| H | 0.94318000  | -1.00093000 | 2.32482300  |
| H | 1.28944100  | 0.73054100  | -1.58033300 |
| H | -1.07991600 | 0.19152200  | -2.03472700 |
| C | -2.86394400 | -1.05965500 | -0.41036000 |
| H | -2.94460100 | -1.46903600 | -1.42225200 |
| H | -3.20950600 | -1.83520400 | 0.28179600  |
| C | -3.79529600 | 0.16117000  | -0.29432900 |
| H | -3.41607800 | 0.93196000  | -0.97701600 |
| C | -3.80113200 | 0.72881000  | 1.12421000  |
| H | -2.80420800 | 1.04188600  | 1.44402300  |
| H | -4.46417600 | 1.59465300  | 1.19088900  |
| H | -4.15906300 | -0.02594500 | 1.83271100  |
| C | -5.20989500 | -0.21907100 | -0.72839700 |
| H | -5.22085600 | -0.60736900 | -1.74974400 |
| H | -5.61449900 | -0.99211100 | -0.06720000 |
| H | -5.87820300 | 0.64411200  | -0.68390600 |
| C | 2.73640200  | 0.26439700  | 0.69759200  |
| H | 2.98938100  | -0.12192500 | 1.68738300  |
| C | 3.08377800  | 1.74895500  | 0.60302800  |
| H | 2.50985000  | 2.30799800  | 1.34127500  |
| H | 4.14889400  | 1.89571100  | 0.78970000  |
| H | 2.84308900  | 2.14317600  | -0.38364200 |
| C | 3.53968000  | -0.54102400 | -0.30874000 |
| O | 4.01740700  | -0.10569500 | -1.32493400 |
| O | 3.63388500  | -1.83054000 | 0.04221900  |
| H | 4.11403400  | -2.30636500 | -0.65168700 |
| O | 0.18666600  | 2.30310300  | -0.36559700 |
| H | -0.64402100 | 2.13761800  | 0.10624600  |

## TS40

|   |             |             |             |
|---|-------------|-------------|-------------|
| C | -0.99622100 | -0.20594400 | 1.39280100  |
| C | 0.32214400  | 0.23286100  | 1.52672300  |
| C | 1.13525300  | 0.37551900  | 0.41383500  |
| C | 0.62332800  | 0.00108600  | -0.85563300 |
| C | -0.73417700 | -0.37418200 | -0.97754600 |
| C | -1.54623200 | -0.50583200 | 0.13776400  |
| H | -1.61380400 | -0.30911100 | 2.27971500  |
| H | 0.70999300  | 0.47530100  | 2.50997500  |
| H | 1.18084800  | 0.25532300  | -1.74856400 |
| H | -1.12809800 | -0.59620100 | -1.96356800 |
| C | -2.99368500 | -0.90869100 | 0.02095000  |
| H | -3.16997500 | -1.35896800 | -0.96194300 |
| H | -3.21615500 | -1.67399400 | 0.77164500  |
| C | -3.96860900 | 0.26836000  | 0.20743900  |
| H | -3.78055800 | 0.70727600  | 1.19516200  |
| C | -5.40824100 | -0.24204600 | 0.17094500  |
| H | -5.58009600 | -0.99984200 | 0.93941200  |
| H | -6.11723500 | 0.57369700  | 0.33035400  |
| H | -5.62641900 | -0.69203600 | -0.80302100 |
| C | -3.74942200 | 1.34749800  | -0.85207100 |
| H | -2.74331800 | 1.76989300  | -0.79846100 |
| H | -3.88730000 | 0.92735100  | -1.85428500 |
| H | -4.46670000 | 2.16198700  | -0.72635400 |
| C | 2.54380800  | 0.91940900  | 0.53339500  |
| H | 2.75780200  | 1.06219100  | 1.59504000  |
| C | 2.70967900  | 2.24306000  | -0.21497400 |
| H | 2.00154100  | 2.97564300  | 0.17418000  |
| H | 3.72164600  | 2.63032000  | -0.08715400 |
| H | 2.52823900  | 2.11220100  | -1.28240100 |
| C | 3.53065700  | -0.11636500 | 0.02275300  |
| O | 4.06947400  | -0.08869900 | -1.05307000 |

|   |            |             |             |
|---|------------|-------------|-------------|
| O | 3.75592500 | -1.07629100 | 0.92780700  |
| H | 4.32846600 | -1.74608900 | 0.52657100  |
| O | 1.46932600 | -1.85997500 | -0.99340000 |
| H | 0.93364400 | -2.28361900 | -0.30527700 |

TS41

|   |             |             |             |
|---|-------------|-------------|-------------|
| C | 1.23207900  | -0.91346500 | -1.04487900 |
| C | -0.09907500 | -0.62308500 | -1.32826100 |
| C | -0.89851500 | 0.03128100  | -0.39236100 |
| C | -0.33757700 | 0.38045200  | 0.83672300  |
| C | 0.99173000  | 0.08256900  | 1.11889500  |
| C | 1.79930100  | -0.56565700 | 0.18226200  |
| H | 1.83852500  | -1.42367600 | -1.78721200 |
| H | -0.52088000 | -0.90901400 | -2.28635300 |
| H | -0.94394400 | 0.88552600  | 1.58268100  |
| H | 1.41074500  | 0.36064700  | 2.08091000  |
| C | 3.25444600  | -0.84800800 | 0.45755800  |
| H | 3.44462000  | -0.78716000 | 1.53491100  |
| H | 3.49160300  | -1.87027200 | 0.14526600  |
| C | 4.20797700  | 0.12125000  | -0.26544700 |
| H | 4.00359100  | 0.04802800  | -1.34070700 |
| C | 5.65767500  | -0.29262300 | -0.01830000 |
| H | 5.84020700  | -1.31732100 | -0.35167200 |
| H | 6.34901900  | 0.36718800  | -0.54802000 |
| H | 5.89169200  | -0.23742500 | 1.04983800  |
| C | 3.97432600  | 1.56574500  | 0.17433600  |
| H | 2.95579100  | 1.89466400  | -0.04407600 |
| H | 4.13652400  | 1.66426900  | 1.25325000  |
| H | 4.66643800  | 2.24203000  | -0.33327100 |
| C | -2.34353500 | 0.37615100  | -0.71312300 |
| H | -2.59345400 | -0.05561800 | -1.68505000 |
| C | -2.57024300 | 1.88696100  | -0.73197100 |

|   |             |             |             |
|---|-------------|-------------|-------------|
| H | -1.88818200 | 2.34281600  | -1.45110300 |
| H | -3.59488100 | 2.12603600  | -1.01463100 |
| H | -2.37129400 | 2.31665100  | 0.25139200  |
| C | -3.23343500 | -0.32122200 | 0.30456400  |
| O | -3.55632500 | 0.19744100  | 1.40440400  |
| O | -3.16677900 | -1.65940400 | 0.18920100  |
| H | -3.57198500 | -2.06109400 | 0.97051800  |
| O | -4.88428800 | 0.14323100  | -0.31724200 |
| H | -5.49593600 | -0.31851500 | 0.28243500  |

·OH

|   |            |            |             |
|---|------------|------------|-------------|
| O | 0.00000000 | 0.00000000 | 0.10817500  |
| H | 0.00000000 | 0.00000000 | -0.86540300 |

OH<sup>-</sup>

|   |            |            |             |
|---|------------|------------|-------------|
| O | 0.00000000 | 0.00000000 | 0.10678000  |
| H | 0.00000000 | 0.00000000 | -0.85424300 |

H<sub>2</sub>O

|   |            |             |             |
|---|------------|-------------|-------------|
| O | 0.00000000 | 0.00000000  | 0.11762800  |
| H | 0.00000000 | 0.76018100  | -0.47051000 |
| H | 0.00000000 | -0.76018100 | -0.47051000 |

HO<sub>2</sub>

|   |             |             |            |
|---|-------------|-------------|------------|
| O | 0.05492000  | -0.59696800 | 0.00000000 |
| H | -0.87871600 | -0.88064600 | 0.00000000 |
| O | 0.05492000  | 0.70704800  | 0.00000000 |

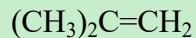

|   |             |             |             |
|---|-------------|-------------|-------------|
| C | 0.00004100  | 1.45827700  | -0.00000200 |
| H | -0.92663900 | 2.02255300  | -0.00011700 |
| H | 0.92675800  | 2.02249200  | 0.00015100  |
| C | 0.00000000  | 0.12539300  | -0.00000800 |
| C | 1.27149500  | -0.67887800 | 0.00001000  |
| H | 2.15495500  | -0.03966700 | 0.00086600  |
| H | 1.30919400  | -1.33116900 | 0.87792300  |
| H | 1.31004800  | -1.32973400 | -0.87896000 |
| C | -1.27153500 | -0.67881500 | 0.00000600  |
| H | -2.15496500 | -0.03956500 | -0.00064200 |
| H | -1.30942900 | -1.33090000 | -0.87806900 |
| H | -1.30993200 | -1.32987600 | 0.87881400  |

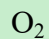

|   |            |            |             |
|---|------------|------------|-------------|
| O | 0.00000000 | 0.00000000 | 0.59418100  |
| O | 0.00000000 | 0.00000000 | -0.59418100 |

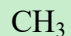

|   |             |             |            |
|---|-------------|-------------|------------|
| C | 0.00002700  | 0.00001400  | 0.00000000 |
| H | 0.97562200  | 0.46193100  | 0.00000000 |
| H | -0.88802500 | 0.61381700  | 0.00000000 |
| H | -0.08776000 | -1.07583200 | 0.00000000 |

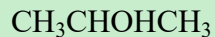

|   |             |             |             |
|---|-------------|-------------|-------------|
| C | 0.00231100  | 0.04123500  | 0.36652500  |
| H | -0.00949000 | 0.09777700  | 1.46201200  |
| C | 1.34105000  | -0.50713300 | -0.08959600 |
| H | 2.15534200  | 0.13691200  | 0.24671900  |
| H | 1.49878500  | -1.50826300 | 0.31585000  |

|   |             |             |             |
|---|-------------|-------------|-------------|
| H | 1.36818100  | -0.56516800 | -1.18088900 |
| C | -1.16125800 | -0.81953600 | -0.10262600 |
| H | -2.11593500 | -0.39730700 | 0.22152400  |
| H | -1.16144700 | -0.88574200 | -1.19369900 |
| H | -1.08079700 | -1.82812000 | 0.30889000  |
| O | -0.09966600 | 1.36615400  | -0.16517000 |
| H | -0.94993000 | 1.73328700  | 0.09512900  |

CH<sub>3</sub>CH=CH<sub>2</sub>

|   |             |             |             |
|---|-------------|-------------|-------------|
| C | 0.13373300  | 0.45785000  | -0.00002300 |
| H | 0.16809700  | 1.54536500  | -0.00000200 |
| C | 1.27639800  | -0.22213800 | 0.00001900  |
| H | 2.23615400  | 0.28158200  | 0.00003400  |
| H | 1.28552200  | -1.30816600 | -0.00007900 |
| C | -1.23038000 | -0.16388200 | -0.00000800 |
| H | -1.80089000 | 0.15249900  | -0.87749300 |
| H | -1.16718500 | -1.25334600 | -0.00084800 |
| H | -1.80020500 | 0.15108700  | 0.87846500  |

(CH<sub>3</sub>)<sub>2</sub>C=CHOOH

|   |             |             |             |
|---|-------------|-------------|-------------|
| C | 0.30600000  | -0.54769500 | -0.19844400 |
| H | 0.52525600  | -1.60931500 | -0.25583200 |
| C | -0.91097200 | -0.04307700 | -0.00827000 |
| H | 3.10832800  | -0.46679400 | -0.21241400 |
| C | -2.09797700 | -0.95910200 | 0.08421100  |
| H | -1.80760000 | -2.00911400 | 0.02983700  |
| H | -2.62936000 | -0.79031600 | 1.02523700  |
| H | -2.80448600 | -0.75255100 | -0.72510400 |
| C | -1.18470200 | 1.43036900  | 0.07918100  |
| H | -0.26665400 | 2.01426400  | 0.11995800  |
| H | -1.76774300 | 1.75840200  | -0.78692000 |

|   |             |             |             |
|---|-------------|-------------|-------------|
| H | -1.78540100 | 1.64364900  | 0.96766300  |
| O | 2.45530200  | -0.16052100 | 0.43204500  |
| O | 1.38889400  | 0.27662200  | -0.41985600 |

NH<sub>3</sub>

|   |             |             |             |
|---|-------------|-------------|-------------|
| N | 0.00000000  | 0.00000000  | 0.11498400  |
| H | 0.00000000  | 0.93979500  | -0.26829500 |
| H | -0.81388600 | -0.46989700 | -0.26829500 |
| H | 0.81388600  | -0.46989700 | -0.26829500 |

CH<sub>3</sub>OH

|   |             |             |             |
|---|-------------|-------------|-------------|
| C | 0.66679000  | -0.01989400 | 0.00000400  |
| H | 1.08916800  | 0.98410500  | -0.00123800 |
| H | 1.01679600  | -0.54940000 | -0.89037500 |
| H | 1.01700900  | -0.54731900 | 0.89154000  |
| O | -0.74778100 | 0.12312800  | 0.00000600  |
| H | -1.14146200 | -0.75304600 | 0.00000300  |

C<sub>2</sub>H<sub>5</sub>OH

|   |             |             |             |
|---|-------------|-------------|-------------|
| C | -0.08202000 | 0.54878800  | -0.00006100 |
| H | -0.14502300 | 1.18897000  | 0.88644200  |
| H | -0.14487900 | 1.18892500  | -0.88661400 |
| O | -1.15020400 | -0.39633900 | -0.00013500 |
| H | -1.98424100 | 0.08123200  | 0.00097300  |
| C | 1.22063800  | -0.22229600 | 0.00006400  |
| H | 2.06905500  | 0.46448400  | -0.00003200 |
| H | 1.28749700  | -0.85580900 | 0.88695000  |
| H | 1.28751500  | -0.85604200 | -0.88665700 |

HCOOH

|   |             |             |             |
|---|-------------|-------------|-------------|
| C | -0.13051800 | 0.40010900  | -0.00002200 |
| O | -1.12869800 | -0.26537800 | 0.00001300  |
| O | 1.10725600  | -0.08928400 | -0.00000200 |
| H | -0.11040700 | 1.49481200  | 0.00006800  |
| H | 1.06504800  | -1.05817500 | -0.00001700 |

CH<sub>3</sub>COOH

|   |             |             |             |
|---|-------------|-------------|-------------|
| C | -0.08903200 | 0.12165400  | 0.00002900  |
| O | -0.62678800 | 1.20012500  | -0.00013000 |
| O | -0.78674400 | -1.02552700 | 0.00004500  |
| H | -1.73077000 | -0.81016000 | -0.00001900 |
| C | 1.38904700  | -0.12207300 | 0.00005300  |
| H | 1.66032700  | -0.70506100 | 0.88123600  |
| H | 1.66031800  | -0.70542100 | -0.88089300 |
| H | 1.91828400  | 0.82636900  | -0.00013600 |



**Text S2.**

The energy barrier of the single electron transfer process was calculated by

$$\Delta G = \frac{(\lambda + \Delta G_{\text{SET}})^2}{4\lambda} \quad (13)$$

$$\lambda = \Delta E_{\text{SET}} - \Delta G_{\text{SET}} \quad (14)$$

where  $\Delta G_{\text{SET}}$  is the Gibbs free energy change for single electron transfer reaction,  $\lambda$  is the reorganization energy related to solute and solvent rearrangements,  $\Delta E_{\text{SET}}$  is the nonadiabatic energy change between reactants and vertical products (i.e., the energies of products are calculated at the same geometries of reactants with a change of charge and spin multiplicity).

### Text S3.

The free energies  $\Delta G(T)$  and energy barrier  $\Delta G^*(T)$  in solution phase were calculated by

$$G(\text{solv}) = G(\text{gas})(T) + G^{\text{solv}}(T) + \Delta G_{1M}(T) \quad (1)$$

$$G(\text{gas})(T) = E_0(\text{gas})(T) + G_{\text{corrected}}(T) \quad (2)$$

$$G^{\text{solv}}(T) = E_1(\text{solv})(T) - E_1(\text{gas})(T) \quad (3)$$

$$\Delta G(T) = \sum_{\text{Products}} G(\text{solv}) - \sum_{\text{reactants}} G(\text{solv}) \quad (4)$$

$$\Delta G^*(T) = (E_0 + G_{\text{corrected}})_{TS} - \sum_{\text{reactants}} G(\text{solv}) \quad (5)$$

where  $G(\text{solv})(T)$  is the free energy in solution phase;  $G(\text{gas})(T)$  is the free energy in gas phase;  $G^{\text{solv}}(T)$  is the solvation free energy;  $E_0(\text{gas})(T)$  is the total electronic energy in gas phase computed using CBS-QB3 method;  $G_{\text{corrected}}(T)$  is the thermal correction to Gibbs free energy computed at M06-2X-D3/6-311+g(d,p) level;  $E_1(\text{solv})(T)$  is the single point energy computed under the solvent model using CBS-QB3 method;  $E_1(\text{gas})(T)$  is the single point energy computed in the gas phase using CBS-QB3 method.

#### Text S4.

Based on the transition state theory (TST), the rate constants were calculated by

$$K^{TST} = \sigma \kappa \frac{k_B T}{h} e^{-\frac{\Delta G^{0,\ddagger}}{RT}} \quad (6)$$

$$\Delta G^{0,\ddagger}(T) = G_{TS}^0(T) - G_{Reactant}^0(T) \quad (7)$$

$$\kappa = \frac{\frac{\pi\beta}{\alpha}}{\alpha \cdot \sin\left(\frac{\pi\beta}{\alpha}\right)} + \frac{\beta}{\alpha - \beta} e^{(\beta - \alpha)V_0} \quad (\beta < \alpha) \quad (8)$$

$$\kappa = \alpha V_0 = \beta V_0 \quad (\beta = \alpha) \quad (9)$$

$$\kappa = \frac{\beta}{\beta - \alpha} [e^{(\beta - \alpha)V_0} - 1] \quad (\beta > \alpha) \quad (10)$$

$$\alpha = \frac{2\pi}{h\nu^\ddagger} \quad (11)$$

$$\beta = \frac{1}{k_B T} \quad (12)$$

where  $k_B$  and  $h$  are the Boltzmann and Planck constants, respectively;  $\sigma$  is the reaction path degeneracy;  $R$  is the gas constant;  $T$  is the temperature;  $\kappa$  is Skodje-Truhlar tunneling factor;  $V_0$  is the barrier height;  $\nu^\ddagger$  is the imaginary frequency.

The one-dimensional Wigner function was used for curvature correction of tunneling effect. The resonance frequency correction coefficient was set as 0.967 at M06-2X-D3/6-311+g(d,p) level.
